## 1 **DNA Methylation Atlas of the Mouse Brain at Single-Cell Resolution**

2 Hanqing Liu<sup>1,2\*</sup>, Jingtian Zhou<sup>1,3\*</sup>, Wei Tian<sup>1</sup>, Chongyuan Luo<sup>1,4,5</sup>, Anna Bartlett<sup>1</sup>, Andrew  
3 Aldridge<sup>1</sup>, Jacinta Lucero<sup>6</sup>, Julia K. Osteen<sup>6</sup>, Joseph R. Nery<sup>1</sup>, Huaming Chen<sup>1</sup>, Angeline Rivkin<sup>1</sup>,  
4 Rosa G Castanon<sup>1</sup>, Ben Clock<sup>7</sup>, Yang Eric Li<sup>8</sup>, Xiaomeng Hou<sup>9</sup>, Olivier B. Poirion<sup>9</sup>, Sebastian  
5 Preissl<sup>9</sup>, Carolyn O'Connor<sup>10</sup>, Lara Boggeman<sup>10</sup>, Conor Fitzpatrick<sup>10</sup>, Michael Nunn<sup>1</sup>, Eran A.  
6 Mukamel<sup>11</sup>, Zhuzhu Zhang<sup>1</sup>, Edward M. Callaway<sup>12</sup>, Bing Ren<sup>8,9</sup>, Jesse R. Dixon<sup>7</sup>, M. Margarita  
7 Behrens<sup>6</sup>, Joseph R. Ecker<sup>1,4†</sup>

8 <sup>1</sup>Genomic Analysis Laboratory, The Salk Institute for Biological Studies, La Jolla, CA 92037

9 <sup>2</sup>Division of Biological Sciences, University of California San Diego, La Jolla, CA 92093

10 <sup>3</sup>Bioinformatics and Systems Biology Program, University of California San Diego, La Jolla, CA  
11 92093

12 <sup>4</sup>Howard Hughes Medical Institute, The Salk Institute for Biological Studies, 10010 N. Torrey  
13 Pines Road, La Jolla, CA 92037;

14 <sup>5</sup>Department of Human Genetics, University of California Los Angeles, Los Angeles, CA 90095

15 <sup>6</sup>Computational Neurobiology Laboratory, The Salk Institute for Biological Studies, La Jolla, CA,  
16 92037

17 <sup>7</sup>Peptide Biology Laboratory, The Salk Institute for Biological Studies, La Jolla, CA 92037

18 <sup>8</sup>Ludwig Institute for Cancer Research, 9500 Gilman Drive, La Jolla, CA 92093, USA

19 <sup>9</sup>Center for Epigenomics, Department of Cellular and Molecular Medicine, Institute of Genomic  
20 Medicine, Moores Cancer Center, University of California San Diego, School of Medicine, La  
21 Jolla, CA, 92037

22 <sup>10</sup>Flow Cytometry Core Facility, The Salk Institute for Biological Studies, La Jolla, CA 92037

23 <sup>11</sup>Department of Cognitive Science, University of California, San Diego, La Jolla, CA 92037

24 <sup>12</sup>Systems Neurobiology Laboratories, The Salk Institute for Biological Studies, La Jolla, CA  
25 92037

26 †Correspondence: [ecker@salk.edu](mailto:ecker@salk.edu)

27 \*These authors contributed equally

## 28 **Summary**

29 Mammalian brain cells are remarkably diverse in gene expression, anatomy, and function, yet  
30 the regulatory DNA landscape underlying this extensive heterogeneity is poorly understood. We  
31 carried out a comprehensive assessment of the epigenomes of mouse brain cell types by  
32 applying single nucleus DNA methylation sequencing to profile 110,294 nuclei from 45 regions  
33 of the mouse cortex, hippocampus, striatum, pallidum, and olfactory areas. We identified 161  
34 cell clusters with distinct spatial locations and projection targets. We constructed taxonomies of  
35 these epigenetic types, annotated with signature genes, regulatory elements, and transcription  
36 factors. These features indicate the potential regulatory landscape supporting the assignment of  
37 putative cell types, and reveal repetitive usage of regulators in excitatory and inhibitory cells for  
38 determining subtypes. The DNA methylation landscape of excitatory neurons in the cortex and  
39 hippocampus varied continuously along spatial gradients. Using this deep dataset, an artificial  
40 neural network model was constructed that precisely predicts single neuron cell-type identity  
41 and brain area spatial location. Integration of high-resolution DNA methylomes with  
42 single-nucleus chromatin accessibility data allowed prediction of high-confidence  
43 enhancer-gene interactions for all identified cell types, which were subsequently validated by  
44 cell-type-specific chromatin conformation capture experiments. By combining multi-omic  
45 datasets (DNA methylation, chromatin contacts, and open chromatin) from single nuclei and  
46 annotating the regulatory genome of hundreds of cell types in the mouse brain, our DNA  
47 methylation atlas establishes the epigenetic basis for neuronal diversity and spatial organization  
48 throughout the mouse brain.

## 49 **Introduction**

50 Epigenomic dynamics is associated with cell differentiation and maturation in the mammalian  
51 brain, and plays an essential role in regulating neuronal functions and animal behavior<sup>1-3</sup>.  
52 Cytosine DNA methylation (5mC) is a stable covalent modification that persists in post-mitotic  
53 cells throughout their lifetime, and is critical for proper gene regulation<sup>2,4,5</sup>. In mammalian  
54 genomes, cytosine methylation predominantly occurs at CpG sites, showing dynamic patterns at  
55 regulatory elements with tissue and cell-type specificity<sup>2,6-8</sup>, modulating binding affinity of  
56 transcription factors (TF)<sup>9,10</sup>, and controlling gene transcription<sup>11</sup>. As a unique signature of

57 neuronal cells, non-CpG (CH) cytosines are also abundantly methylated in the mouse and  
58 human brain<sup>2</sup>, which can directly affect DNA binding of MeCP2 methyl-binding protein  
59 responsible for Rett Syndrome<sup>12-14</sup>. mCH levels at gene bodies are anti-correlated with gene  
60 expression and show a remarkable diversity across neuronal cell types<sup>7,8</sup>.

61 Deeper understanding of epigenomic diversity in the mouse brain not only provides a  
62 complementary approach to transcriptome-based profiling methods to identify all brain cell types  
63 but additionally allows genome-wide prediction of the regulatory DNA sequences and  
64 transcriptional networks that underlie this diversity. Our previous studies demonstrated the utility  
65 of studying brain cell-type and regulatory diversity using single nucleus methylome sequencing  
66 (snmC-seq)<sup>8,15</sup>. In this study, we use snmC-seq2<sup>16</sup> to conduct thorough methylome profiling with  
67 detailed spatial dissection in the adult postnatal day 56 (P56) mouse brain (Fig. 1a). In Li et al.  
68 (Companion Manuscript # 11), the same tissue samples were also profiled in parallel using  
69 single nucleus ATAC-seq (snATAC-seq) to identify genome-wide accessible chromatin<sup>17</sup>,  
70 providing complementary epigenomic information to aid in cell-type specific regulatory genome  
71 annotation. Moreover, to further study cis-regulatory elements and their potential targeting  
72 genes across the whole genome, we applied a multi-omic assay sn-m3C-seq<sup>18</sup> to profile  
73 methylome and chromatin conformation in the same cells.

74 The deep epigenomic datasets described here provide a detailed and comprehensive census of  
75 the diversity of cell-types across mouse brain regions, allowing prediction of cell-type-specific  
76 regulatory elements as well as their candidate target genes and upstream TFs. Highlights of the  
77 findings of our study include:

- 78 ● Single nucleus methylome sequencing of 110,294 cells from the 45 dissected regions  
79 across cortex, hippocampus, striatum, pallidum, and olfactory areas of the mouse brain  
80 provides the largest single-cell base-resolution DNA methylation dataset.
- 81 ● A robust single cell methylome analysis framework identifies 161 predicted mouse brain  
82 subtypes. The relationship between subtypes in distinct brain areas provides novel  
83 insights into anatomical cell/sub-structure associations.
- 84 ● Comparing subtype-level methylomes allows identification of 3.5M cell-type-specific  
85 differentially CG methylated regions (CG-DMR) that cover ~ 50% (1,240 Mb) of the  
86 mouse genome.

- 87 • Differentially methylated TF genes and binding motifs can be associated with branches  
88 in subtype phylogeny, allowing the prediction of cell-type gene regulatory programs  
89 specific for each developmental lineage.
- 90 • Integrative analysis with chromatin accessibility based cell clusters validate most  
91 methylome-derived subtypes, allowing prediction of 1.6M enhancer-like DMRs (eDMR)  
92 across cell subtypes.
- 93 • Identify cis-regulatory interactions between enhancers and genes with computational  
94 prediction and single-cell chromatin conformation profiling (in hippocampus).
- 95 • A continuous three-dimensional spatial methylation gradient was observed in cortical  
96 excitatory and dentate gyrus granule cells, with region-specific TFs and motifs found  
97 associated with the gradients.
- 98 • An artificial neural network model constructed using this deep dataset precisely predicts  
99 single neuron cell-type identity and brain area spatial location using only its methylome  
100 profile as input.

## 101 **Results**

### 102 **A single cell DNA methylome atlas of 45 mouse brain regions**

103 We used single-nucleus methylcytosine sequencing 2 (snmC-seq2)<sup>16</sup> to profile genome-wide  
104 cytosine DNA methylation at single-cell resolution across four major brain structures: cortex,  
105 hippocampus (HIP), striatum and pallidum (or cerebral nuclei, CNU), and olfactory areas (OLF)  
106 (Fig. 1d-g) using adult male C57BL/6 mice (age P56-63). In total we analyzed 45 dissected  
107 regions in two replicates (Extended Data Fig. 1, Supplementary Table 2).  
108 Fluorescence-activated nuclei sorting (FANS) of antibody-labeled nuclei was applied to capture  
109 NeuN positive (NeuN<sup>+</sup>, 92%) neurons, while also sample a smaller number of NeuN negative  
110 (NeuN<sup>-</sup>, 8%) non-neuronal cells (Fig. 1a). In total, we profiled the DNA methylomes of 110,294  
111 single nuclei yielding, on average, 1.5 million stringently filtered reads/cell (mean  $\pm$  SD:  $1.5 \times 10^6$   
112  $\pm 5.8 \times 10^5$ ), covering  $6.2 \pm 2.6\%$  of the mouse genome per cell. In each cell, we reliably  
113 quantified DNA methylation for  $95 \pm 4\%$  of the mouse genome in 100kb bins and  $81 \pm 8\%$  of  
114 gene bodies (Fig. 1i). In parallel, we performed single-nucleus ATAC-seq (snATAC-seq)<sup>17</sup> on  
115 nuclei from the same samples to identify sites of accessible chromatin (see below and Li et al.,  
116 companion manuscript # 11).

117 Based on the DNA methylome profiles in both CpG sites (CG methylation or mCG hereafter)  
118 and non-CpG sites (CH methylation or mCH) in 100kb bins throughout the genome, we  
119 performed a three-level iterative clustering analysis to categorize the epigenomic cell  
120 populations (Fig. 1b, c). After quality control and preprocessing (see Methods), in the first level  
121 (cell class), we clustered 103,982 cells into 67,472 (65%) excitatory neurons, 28,343 (27%)  
122 inhibitory neurons, and 8,167 (8%) non-neurons. The portion of non-neurons is determined by  
123 the FANS of NeuN<sup>+</sup> nuclei (Supplementary Table 3, Extended Data Fig. 2b). The second round  
124 of iterative analysis of each cell class identified 41 major types in total (cluster size range  
125 95-11,919, median 1,819 cells), and the third round separated these major types further into 161  
126 cell subtypes (cluster size range 12-6,551, median 298 cells). Each subtype can be  
127 distinguished from all others based on: 1) a supervised model that reproduces the cluster label  
128 with > 0.9 cross-validated accuracy; and 2) at least 5 differentially methylated genes between  
129 each pair of subtypes (see Methods, and Extended Data Fig. 2, Supplementary Table 4 for  
130 subtype names and signature genes). All subtypes are highly conserved across replicates  
131 (Extended Data Fig. 2d), and replicates from the same brain region are co-clustered compared  
132 to samples from other brain regions (Extended Data Fig. 2e-g).

133 The spatial distribution of each cell type is assessed based on where the cells were dissected  
134 from (Supplementary Table 6). Here we used the Uniform Manifold Approximation and  
135 Projection (UMAP)<sup>19</sup> to visualize epigenetic differences based on cell location (Fig. 1b, Extended  
136 Data Fig. 3) and major cell type (Extended Data Fig. 2a). Major non-neuronal types have a  
137 similar distribution across brain regions (Fig. 1h), with the exception of Adult Neuron Progenitors  
138 (ANP). We found two subtypes of ANP presumably corresponding to neuron precursors in the  
139 subgranular zone of the dentate gyrus (DG)<sup>20</sup> (“ANP anp-dg”, 121 cells) and the rostral  
140 migratory stream (RMS)<sup>21</sup> in CNU and OLF (“ANP anp-olf-cnu”, 210 cells). Major excitatory  
141 neuron types from isocortex, OLF, and HIP formed separate subtypes, with some exceptions  
142 potentially due to overlaps in dissected regions (see “Potential Overlap” column in  
143 Supplementary Table 2). Cells from isocortex were assigned to subtypes based on their  
144 projection types<sup>8,22,23</sup>. The Intratelencephalic (IT) neurons from all cortical regions contain four  
145 major types corresponding to the laminar layers (L2/3, L4, L5, and L6), with additional subtypes  
146 in each layer that differ across cortical regions. We also identified major types from cortical  
147 subplate structures, including the claustrum (CLA) and endopiriform nucleus (EP) from isocortex  
148 and OLF dissections.

149 GABAergic inhibitory neurons from isocortex and HIP cluster together into five major types, but  
150 most HIP neurons are then separated from isocortical neurons at the subtype level, in  
151 agreement with a companion transcriptomic study<sup>24</sup>. Intriguingly, in one major GABAergic type  
152 marked by low methylation at the gene *Unc5c* (suggesting high RNA expression), cells from HIP  
153 and isocortex remain to be co-clustered at subtype levels. The isocortex cells in this cluster  
154 display hypo-mCH in the gene body of both *Lhx6* and *Adarb2*, corresponding to the previously  
155 reported “Lamp5-Lhx6” cluster in transcriptome studies<sup>22,25,26</sup>. The close relationship between  
156 this cell type and HIP interneurons was also reported in a single-cell transcriptomic study in  
157 marmoset<sup>27</sup>. In contrast with excitatory neurons, subtypes of isocortical GABAergic neurons do  
158 not separate by cortical region. Interneurons from CNU and OLF group into nine major types  
159 and many subtypes which further separate by region (see vignette below), indicating substantial  
160 spatial diversity among CNU and OLF interneurons. In the next section, we provide several  
161 analytic vignettes to illustrate the unprecedented level of neuronal subtype and spatial diversity  
162 observed in their DNA methylomes.

### 163 **Neuron subtype vignettes**

#### 164 *Methylome similarity between Indusium Griseum and Hippocampal region CA2 neuron subtypes*

165 Nearly all hippocampal excitatory neurons formed their own clusters separately from cells in  
166 other brain regions (Fig. 1h), except the IG-CA2 neurons (745 cells, three subtypes; IG:  
167 Indusium griseum, CA: Cornu Ammonis) (Fig. 2c). Several markers of the hippocampal region  
168 CA2<sup>28</sup> (e.g., *Pcp4*<sup>29</sup>, *Cacng5*<sup>30</sup>, *Ntf3*<sup>31</sup>) were marked by low gene body mCH (Fig. 2d) in IG-CA2  
169 subtypes. However, one subtype “IG-CA2 Xpr1” (subtype 1 in Fig. 2c, 152 cells) was located in  
170 the Anterior Cingulate Area (ACA, 72 cells) and Lateral Septal Complex (LSX, 71 cells), which  
171 are anatomically distinct from the hippocampus (Extended Data Fig. 1). In-situ hybridization  
172 (ISH) data from the Allen Brain Atlas (ABA) of *Ntf3* (Fig. 2d, S4c) indicates that those cells  
173 potentially come from the IG region<sup>32</sup> (Fig. 2e), which is a thin layer of gray matter lying dorsal to  
174 the corpus callosum at the base of the anterior half of the cingulate cortex, included in the ACA  
175 and LSX dissection regions (Fig. 2c, 3D model). With the power of single-cell epigenomic  
176 profiling, we are able to classify cells from this region without additional dissection. Moreover the  
177 similarity of their DNA methylomes indicates the possible functional and/or developmental

178 relationship between the CA2 and IG excitatory neurons. Finally, the hypo-mCG regions  
179 surrounding the marker genes like *Ntf3* (Extended Data Fig. 4b) identify candidate  
180 cell-type-specific enhancers which may further our understanding of how specific gene  
181 expression programs are regulated in these structures.

### 182 *Methylation signatures of striatal medium spiny neurons located in patch compartments*

183 A major GABAergic inhibitory cell type in the striatum, the *Drd1+* medium spiny neuron  
184 (MSN-D1) from the caudoputamen (CP, dorsal) and nucleus accumbens (ACB, ventral), is  
185 further separated into four subtypes (Fig. 2f, S4d). Two subtypes “MSN-D1 *Plxnc1*” (subtype 3  
186 in Fig.2f) and “MSN-D1 *Ntn1*” (subtype 4 in Fig.2f), mainly (79%) from the ACB, are further  
187 separated by location along the anterior-posterior axis (Extended Data Fig. 4e, based on  
188 dissection), indicating spatial diversity may exist in addition to the canonical dorsal-ventral  
189 gradient of the striatum<sup>33,34</sup>. “MSN-D1 *Khdrbs3*” and “MSN-D1 *Hrh1*” subtypes are mostly (94%)  
190 from CP dissections, one of them marked by gene *Khdrbs3* and its potential regulatory elements  
191 (Fig. 2g, h, Extended Data Fig. 4f) corresponds to the neurochemically defined patch<sup>35</sup>  
192 compartments in CP. Here the methylome profiling data provides evidence of previously unseen  
193 spatial epigenetic diversity in the striatum D1 neurons, which is also observed in the other major  
194 type MSN-D2 (*Drd2+*) of the striatum (Extended Data Fig. 4g, e, i).

### 195 *Spatial and projection specificity of extra-telencephalic (ET) neuron subtypes*

196 We found that cortical excitatory subtypes have distinct spatial distributions. For example,  
197 subtypes of L5-ET consist of cells from different cortical regions (Fig. 2i, k). This is further  
198 confirmed by integrating our snmC-seq2 data with data from neurons with defined projections  
199 from a parallel study using Epi-Retro-Seq (Companion Manuscript # 10)<sup>36</sup> (Fig. 2j).  
200 Epi-Retro-Seq uses retrograde viral labeling to select neurons projecting to specific target brain  
201 regions followed by methylome analysis of their epigenetic subtypes. To further infer the  
202 projection target of L5-ET cells profiled in our study, we performed co-clustering on the  
203 integrated datasets and calculated the overlap between unbiased (snmC-seq2) and targeted  
204 (Epi-Retro-Seq) profiling experiments (Extended Data Fig. 4m). Interestingly, some subtypes  
205 identified from the same cortical area show different projection specificity. For example, in the  
206 L5-ET neurons, SSp and MOp neurons were mainly enriched in three subtypes marked by  
207 *Kcnh1*, *Tmtc2*, and *Nectin1*, respectively. However, medulla projecting neurons in the MOp and

208 SSp only integrate with the subtype marked with *Kcnh1* (Fig. 2l), suggesting that the subtypes  
209 identified in unbiased methylome profiling have distinct projection specificity.

#### 210 *Consensus epigenomic profiles of brain cell subtypes*

211 Integrating single-cell datasets collected using different molecular profiling modalities (e.g.  
212 snRNA-seq, snmC-seq2, snATAC-seq) can help to establish a consensus cell type atlas<sup>23,37</sup>.  
213 Using a mutual nearest neighbor based approach<sup>38,39</sup> (see Methods), we integrated the  
214 methylome data with the chromatin accessibility data profiled using snATAC-seq on the same  
215 brain samples from a parallel study (Li et al., Companion Manuscript # 11). As visualized by the  
216 ensemble UMAP, after integration the two modalities validated each other at the level of subtype  
217 cluster assignment (Fig. 2m, n, Extended Data Fig. 5a). We then performed co-clustering of the  
218 integrated data and calculated Overlap Scores (OS) between the original methylation subtypes  
219 (m-types) and the chromatin accessibility subtypes (a-types) (Fig. 2o, Extended Data Fig. 5b).  
220 The OS describes the level of co-clustering of two groups of cells, where a higher value means  
221 the two groups are more similarly distributed across co-clusters (see Methods and  
222 Supplementary Table 7). The high overlap of CG-DMRs and open chromatin peaks in the  
223 hippocampus also confirmed the correct match of cell-type identities (Fig. 2p).

#### 224 **Regulatory hierarchy of neuronal subtypes**

225 Having developed a consensus map of cell types based on their DNA methylomes, we further  
226 explored the gene regulatory relationship between neuronal subtypes. We constructed two  
227 phylogeny trees for 68 excitatory types (Extended Data Fig. 6a) and 77 inhibitory types  
228 (Extended Data Fig. 6b) respectively, based on the gene body mCH level of 2,503 differentially  
229 methylated genes (CH-DMGs) between every pair of clusters. The taxonomy tree structures  
230 represent the similarities of these discrete subtypes, and may reflect the developmental history  
231 of neuronal type specification<sup>22,25</sup>.

232 A unique advantage of single-neuron methylome profiling is that it captures the information of  
233 both cell-type-specific gene expression and predicted regulatory events. Specifically, gene body  
234 mCH is predictive of gene expression in neurons<sup>2,7,8</sup>, while CG-DMRs indicate cell-type specific  
235 regulatory elements, and TFs whose motifs enriched in these CG-DMRs predict the crucial  
236 regulators of the cell type<sup>6-8</sup>. We used both CH-DMGs and CG-DMRs to further annotate the



237 tree and explore the features specifying cell subtypes (Exc: Fig. 3a-c, Inh: Extended Data Fig.  
238 6c, d).

239 To better understand which genes contribute to cell type specifications in the branches of the  
240 tree, we calculated a branch-specific “methylation impact score” for each gene that summarises  
241 all of the pairwise comparisons related to that branch (Fig. 3d; see Methods). The impact score  
242 ranges from 0 to 1, with a higher score predicting stronger functional relevance to the branch.  
243 With impact scores > 0.3, a total of 6,038 unique genes were assigned to branches within the  
244 excitatory phylogeny (5,975 in inhibitory), including 406 TF genes (412 in inhibitory).

245 Key TFs determine the neuronal cell-type identity by targeting downstream genes through the  
246 binding to regulatory DNA elements during brain development<sup>40</sup>. Timed expression of these TFs  
247 and their co-regulators throughout the neuron's lifespan is critical to maintain cell-type  
248 identity<sup>40-42</sup>. To better understand what regulatory elements and TFs contribute to cell-type  
249 specification in the tree, we annotated branches of the tree with TF motif usage. We first  
250 identified 3.9 million DMRs across all the cell types, with an average size of  $624 \pm 176$  bp (mean  
251  $\pm$  SD), covering 50.0% of the genome CpG sites spanning 1,240 Mb in total (see Methods). We  
252 next scanned 719 known TF binding motifs from the JASPAR database<sup>43</sup> across these DMRs  
253 and performed motif enrichment analyses using all pairwise DMRs identified between neuronal  
254 subtypes (Exc: Fig. 3c, Inh: Extended Data Fig. 6d). Similar to the analysis of DMGs, the  
255 pairwise enriched motifs were assigned to branches on the subtype phylogeny using their  
256 impact scores.

257 This analysis revealed a possible regulatory role for several TFs assigned to the upper nodes of  
258 the phylogeny. For example, motifs from the ROR(NR1F) family were assigned to the branch  
259 that separates superficial layer IT neurons from deeper layer IT neurons (Fig. 3h, node 9),  
260 whereas motifs from the CUX family were assigned to the L2/3-IT branch separating from  
261 L4/5-IT neurons (Fig. 3h, node 11). Both families contain known members, for example *Cux1*,  
262 *Cux2*<sup>44</sup>, *Rorb*<sup>45</sup> that show laminar expression in the corresponding layers and regulate cortical  
263 layer differentiation during development.

264 After impact score assignment, each branch of this phylogeny was associated with multiple TF  
265 genes and motifs, which potentially function in combination to shape cell-type identities<sup>46</sup> (Fig.

266 3g, h). As an example, we focused on two brain structures of interests: the claustrum (CLA) and  
267 the Endopiriform Nucleus (EP)<sup>47,48</sup>. Single excitatory neurons from these two structures were  
268 included in the dissection of several cortical and piriform cortex regions (Supplementary Table  
269 6). At the major-cell-type level, two distinct clusters are marked by *Npsr1* (EP) or *B3gat2* (CLA),  
270 and the known EP/CLA marker TF *Nr4a2*<sup>47,49</sup> were observed to be significantly hypomethylated  
271 in both clusters compared to the others. Accordingly, the NR4A2 motif is also associated with a  
272 branch that splits CLA neurons from L6-IT neurons (Fig. 3g, h, node 6). On another branch  
273 separating EP from CLA and L6-IT neurons, several TFs including NF-1 family gene *Nfia* and  
274 *Nfib*, and RFX family gene *Rfx3*, together with corresponding motifs (Fig. 3g, 3h, node 5) rank  
275 near the top. Our findings suggest that these TFs may function together with *Nr4a2*, potentially  
276 separating EP neurons from CLA and L6-IT neurons.

277 Beyond identifying specific cell subtype characteristics, we hypothesized that ranking of genes  
278 or motifs by methylation variation may provide a route toward understanding their relative  
279 importance in cell type diversification and/or function. Thus, for each gene or motif, we  
280 calculated a total impact (TI) score to summarize their variation among the subtypes, using all  
281 the branch specific impact scores (see Methods). Genes or motifs with higher TI score impact  
282 more branches of the phylogeny, thus are predicted to have higher importance in distinguishing  
283 multiple subtypes. Intriguingly, by comparing the TI scores of genes and motifs calculated from  
284 the inhibitory and excitatory phylogenies, we found more TF genes and motifs having large TI  
285 scores in both cell classes than specific to either one (Extended Data Fig. 6i). For instance,  
286 *Bcl11b* distinguishes “OLF-Exc” and Isocortex IT neurons in the excitatory lineage, and  
287 distinguishes “CGE-Lamp5” and “CGE-Vip” in the inhibitory lineage. Similarly, *Satb1* separates  
288 L4-IT from L2/3-IT, and MGE from CGE in excitatory and inhibitory cells, respectively. These  
289 findings indicate broad repurposing of TFs for cell type specification among distinct  
290 developmental lineages.

291 In contrast, we also find TF genes and motifs only having large TI scores in one cell class  
292 (Extended Data Fig. 6i). For example, *Tshz1* gene body mCH shows a striking difference of  
293 diversity between excitatory and inhibitory cells (Extended Data Fig. 6h), suggesting that it may  
294 function in shaping inhibitory subtypes, but not excitatory subtypes. Similarly, bHLH DNA  
295 binding motifs show much higher TI scores for excitatory subtypes compared with inhibitory  
296 (Extended Data Fig. 6i). While genes in this TF family such as *Neurod1/2* have long been

297 known to participate in excitatory neuron development, they have not been reported to regulate  
298 GABAergic neuron differentiation<sup>50</sup>.

### 299 **Defining regulatory interaction between enhancers and genes at the cell type level**

300 To systematically identify enhancer-like regions in specific cell types, we predicted  
301 enhancer-DMRs (eDMR) by integrating matched DNA methylome and chromatin accessibility  
302 profiles of 161 subtypes using the REPTILE algorithm<sup>51</sup> (Fig. 4a). We identified 1,612,198  
303 eDMR (34% of total DMRs), 73% of which overlapped with separately identified snATAC peaks  
304 (Fig. 4b). Fetal-enhancer DMRs (feDMR, eDMRs identified across developing time points) of  
305 forebrain bulk tissues<sup>6</sup> show high (88%) overlap with eDMRs. Surprisingly, the eDMRs also  
306 cover 74% of the feDMRs from other fetal tissues<sup>6</sup>, indicating extensive reuse of enhancer-like  
307 regulatory elements across mammalian tissue types (Fig. 4b).

308 Next, we examined the relationship between the cell type signature genes and their potential  
309 regulatory elements. After regressing out the global methylation level, we calculated the partial  
310 correlation between all DMG-DMR pairs within 1 Mb distance, using methylation levels across  
311 145 neuronal subtypes (see Methods). Non-neuronal subtypes were not included in this  
312 analysis due to the large difference in the global methylation level compared to neurons. We  
313 identified a total of 1,038,853 (64%) eDMR that correlated with at least one gene (correlation >  
314 0.3 with empirical  $P$  value <  $1e-4$ , two-sided test, Extended Data Fig. 7a). Notably, for those  
315 strongly positive-correlated DMR-DMG pairs (correlation > 0.5), the DMRs are largely (63%)  
316 within 100kb to the TSSs of the corresponding genes, but depleted from  $\pm$  1kb (Fig. 4c,  
317 Extended Data Fig. 7b), whereas for the negatively correlated DMR-DMG pairs, only 11% of  
318 DMRs are found within 100kb of the TSS (Extended Data Fig. 7c).

319 eDMR-DMG correlation analysis predicts regulatory interactions between enhancers and genes  
320 at subtype resolution. Using the gene-enhancer interactions predicted by this correlation  
321 analysis, we assigned eDMRs to their target genes, and calculated the percentage of overlap  
322 with feDMR. We found that these percentages vary dramatically among genes (Fig. 4d). For  
323 example, in *Bcl11b*, an early developmental TF gene<sup>52</sup>, 63% of the positively correlated eDMRs  
324 overlap with forebrain feDMRs (Fig. 4f, first row). However, for *Tle4*, a gene known to be  
325 functional in L6-CT<sup>53</sup> and MSN-D1/D2 neurons, the percentage of eDMR that overlapped with

326 feDMRs was only 20% (Fig. 4d). Interestingly, when further classifying *Tle4* correlated eDMR  
327 into three subgroups using K-means clustering (k=3, see Methods), we identified subgroups  
328 with different cell-type-specificity (Fig. 4f, second row. Extended Data Fig. 7d). One group (G2)  
329 of elements that displayed little diversity during development in bulk data showed highly specific  
330 mCG and open chromatin signals in MSN-D1/D2 neurons, while another group (G3) is specific  
331 to L6-CT neurons. These two groups of DMRs suggest possible alternative regulatory elements  
332 usage to regulate the same gene in different cell-types although further experiments are  
333 required to validate this hypothesis.

334 Together, these analyses indicate that previously defined developmental regulatory elements  
335 from bulk tissues are limited in terms of the cell type resolution. For those broadly effective  
336 regulatory elements (e.g., feDMRs correlated with *Bcl11b*) that also have been identified in bulk  
337 tissues, single-cell profiling allows us to carefully chart their cell type specificity into subtype  
338 level. In addition, we identified many novel regulatory elements (e.g., eDMRs correlated with  
339 *Tle4* in MSN-D1/D2) that show more restricted specificity, providing abundant candidates for  
340 further pursuing enhancer-driven AAVs<sup>54-56</sup> that target fine cell types.

#### 341 **Single-nucleus multi-omic profiling of chromatin contact and DNA methylation validates** 342 **gene-enhancer interactions**

343 Distal enhancers typically regulate gene expression by physical interaction with promoters<sup>57</sup>.  
344 Therefore, to examine whether our correlation-based predictions of enhancer-gene associations  
345 are supported by physical chromatin contacts, we generated single-nucleus methylation and  
346 chromosome conformation capture sequencing (sn-m3C-seq)<sup>18</sup> data for 5,142 single nuclei from  
347 the DG and CA (152k contacts per cell on average). We assigned each of these cells to one of  
348 the 161 subtypes based on their methylome, using a supervised model trained with >100k  
349 snmC-Seq2 cells. By merging the contact matrices of all single cells belonging to the same  
350 methylation-defined subtype, we generated contact maps for eight major cell types that include  
351 more than 100 cells. In total, 19,151 chromosome loops were identified in at least one of the  
352 cell-types at 25kb resolution (range from 1,173 to 12,614).

353 Since sn-m3C-seq data identified structural interactions between genes and regulatory  
354 elements, we next asked whether these interactions were consistent with the predictions from

355 eDMR-DMG correlation analysis. Using DG and CA1 as examples (the neuronal types with  
356 highest coverage), a notably higher correlation was observed between enhancers and genes at  
357 loop anchors compared to random enhancer-gene pairs after controlling for genomic distance  
358 (Fig. 4g;  $P$  value=5.9e-74 for DG and 3.0e-158 for CA1, two-sided Wilcoxon rank-sum tests).  
359 Reciprocally, the enhancer-gene pairs showing the stronger correlation of methylation were  
360 more likely to be found linked by chromosome loops or within the same looping region (Fig. 4h,  
361 Extended Data Fig. 7f). We also compared the concordance of methylation patterns between  
362 genes and enhancers linked by different interaction-based methods, and found the pairs linked  
363 by loop anchors or closest genes had the highest correlation of methylation (Extended Data Fig.  
364 7g). Together, these analyses validate the physical proximity of co-associated, hypomethylated  
365 enhancer-gene pairs predicted by our correlation based method in specific cell types.

366 In addition, we observed significant cell type specificity of 3D genome structures. The major cell  
367 types could be distinguished on UMAP embedding based on chromosome interaction at 1 Mb  
368 resolution (Fig. 4i), indicating the dynamic nature of genome architecture across cell types.  
369 Among the 19,151 chromosome loops at 25 kb resolution, 48.7% showed significantly different  
370 contact frequency between cell types (Fig. 4j). eDMRs were highly enriched at these differential  
371 loop anchors (Fig. 4k;  $p < 0.005$ , permutation test). mCG levels at distal cis-elements are typically  
372 anti-correlated with enhancer activity<sup>6</sup>. Thus, we hypothesized that enhancers at differential loop  
373 anchors might also be hypomethylated in the corresponding cell-type. Indeed, using the loops  
374 identified in DG granule cells and CA1 as an example, we observed that in DG, enhancers at  
375 the anchors of DG specific loops were hypomethylated compared to enhancers at the anchors  
376 of CA1 specific loops ( $P$  value=2.9e-103, two-sided Wilcoxon rank-sum test); the opposite  
377 scenario was found in CA1 (Fig. 4l;  $P$  value=3.5e-5, two-sided Wilcoxon rank-sum test).

378 Many differential loops were observed near the marker genes of the corresponding cell type.  
379 For example, *Foxp1*, a highly expressed TF in CA1 but not DG<sup>58</sup>, has chromosome loops  
380 surrounding its gene body in CA1 but not DG (Fig. 4m). eDMRs and open chromatin were  
381 observed at these loop anchors (Fig. 4m). Intriguingly, three loops in CA1 anchored at the TSS  
382 of the same transcript of *Foxp1* (Fig. 4m, box 2-4). Stronger demethylation and chromatin  
383 accessibility were also observed at the same transcript compared to the others (Fig. 4m, view  
384 E). These epigenetic patterns might suggest a specific transcript of *Foxp1* (*Foxp1*-225) is  
385 selectively activated in CA1. In contrast, *Lrrtm4*, a DG marker gene encoding a presynaptic

386 protein that mediates excitatory synapse development in granule cells<sup>59</sup>, shows extensive  
387 looping to distal elements in DG but not CA1 (Extended Data Fig. 7h). Notably, 34 genes  
388 showed alternative loop usage, 20 of which expressed in both DG and CA1 (CPM > 1). *Grm7* is  
389 an example where its TSS interacts with an upstream enhancer in DG but with gene-body  
390 enhancers in CA1 (Extended Data Fig. 7i).

### 391 **Spatial gradients in intra-telencephalic (IT) excitatory neurons**

392 IT neurons from different cortical areas are typically classified into major types corresponding to  
393 their laminar locations: L2/3, L4, L5, and L6 (Fig. 5a). In agreement with the correlation between  
394 transcription<sup>22</sup> and DNA methylation, we found that IT neurons show hypomethylation of the  
395 marker genes defined in Tasic et al.<sup>22</sup> in the corresponding layers (Extended Data Fig. 8c). For  
396 example, the *Rorb*<sup>+</sup> L4 cells show unique gene body hypomethylation in both somatomotor (MO)  
397 and somatosensory areas (SS) (Extended Data Fig. 8c). These findings suggest that although  
398 the MO lacks a cytoarchitectural visible L4<sup>60</sup>, there is a population of IT neurons that are  
399 epigenetically similar to L4 neurons in SS. The presence of a putative L4 neuron population in  
400 MO is also supported by transcriptomics<sup>23</sup> and neuronal connectivity<sup>60</sup>. Furthermore,  
401 unsupervised UMAP embedding (Fig. 5a) reveals a continuous gradient of IT neurons  
402 resembling the medial-lateral distribution of the cortical areas (Fig. 5b), strongly suggesting that  
403 the cortical arealization information is well preserved in the DNA methylome.

404 To systematically explore the spatial gradient of DNA methylation patterns, we remerge the cells  
405 into spatial groups based on their cortical layer and anatomical regions. A phylogenetic tree was  
406 generated using the mCH level of highly variable 100kb chromosome bins of these spatial  
407 groups' centroids (see Methods). The phylogeny split the cells into four laminar layer groups,  
408 followed by cortical area separation within each layer (Fig. 5c). This provides a clear structure  
409 for calculating the methylation total impact score of layer-related or region-related DMGs and TF  
410 binding motifs separately (Fig. 5d, see Methods). In brief, the top layer-related TFs included  
411 most of the known laminar marker genes together with their DNA binding motifs (Fig. 5d), while  
412 some of them show regional specific methylation differences between layers. For example,  
413 *Cux1*, a top-ranked TF marker gene for L2/3 and L4 neurons, is hypomethylated in MO and SS,  
414 but is hypermethylated in L2/3 of other regions we sampled, in agreement with patterns from  
415 in-situ hybridization<sup>61</sup>. *Cux2*, a gene from the same TF family, does not show the same regional

416 specificity (Extended Data Fig. 8c). We also identified many additional TFs having cortical  
417 region specificity (Fig. 5e, f). For example, *Etv6* is only hypomethylated in medial dissection  
418 regions, while *Zic4* is hypermethylated in those regions across layers. In contrast, *Rora* shows  
419 anterior-posterior methylation gradient only in the L4 and L5 cells. Together, these observed  
420 methylome spatial gradients demonstrated the value of our dataset for further exploring the  
421 cortical arealization with cell-type resolution.

## 422 **Spatial gradients in dentate gyrus granule cells**

423 Another striking spatial gradient was observed in granule cells from DG. UMAP embedding of  
424 granule cells displayed continuous global mCH and mCG level gradients that correlated with  
425 their dorsal-ventral location. Granule cells from the ventral DG show higher global CG and CH  
426 methylation compared to cells from the dorsal DG (Fig. 5g). To investigate the biological  
427 significance of these gradients, we identified 219,498 gradient CG-DMRs by grouping DG cells  
428 according to their global mCH level. Among them, 139,387 DMRs are positively correlated with  
429 global mCH, and 80,111 are negatively correlated DMRs (Fig. 5h). Positively or negatively  
430 correlated DMRs showed significant enrichment in two different sets of genes (245 pos. corr.;  
431 183 neg. corr.) which include TF genes such as *Tcf4* and *Rfx3* compared to the genome  
432 background (Fig. 5i-j, see Methods). Based on Gene Ontology analysis, the negatively  
433 correlated DMRs are enriched in genes related to synaptic functions (Extended Data Fig. 8d),  
434 while the positively correlated DMRs are enriched in developmental related genes (Extended  
435 Data Fig. 8e). Together, these results indicate a continuous methylation gradient exists in the  
436 dorsal-ventral axis of the DG granule layers, supporting an intra-cell-type molecular shift that  
437 parallels the known functional and anatomical differences in dorsal-ventral DG<sup>62,63</sup> that are  
438 possibly controlled via gradient DNA methylation<sup>64</sup>.

439 Next, we investigated whether the global dynamic of methylation is correlated with changes in  
440 3D genome architecture. By plotting the interaction strength against the genomic distance  
441 between the anchors (decay curve), a higher proportion of short-range contacts and smaller  
442 proportion of long-range contacts were observed in the groups with higher global mCH (Fig. 5k).  
443 This might indicate a more compact nuclear structure in these groups. The genome is organized  
444 into specific 3D features with different levels of resolution, including compartments, domains,  
445 and loops. We tested the differences of these features across DG cells grouped based on their

446 global mCH levels. Although compartment strengths were not correlated with these methylation  
447 changes (Extended Data Fig. 8f), the number of intra-domain contacts was positively correlated  
448 with global mCH across single cells (Fig. 5l), which is concordant with the patterns observed in  
449 the contact frequency decay curves. Interestingly, after normalizing the effect of decay, we found  
450 the insulation scores at domain boundaries were significantly lower in the groups with high  
451 global mCH levels (Fig. 5m; all  $p < 1e-10$ , two-sided Wilcoxon signed-rank test), which suggests  
452 that the domain structures might be more condensed over flanking regions in these cell groups.

### 453 **Deep neural network learning of cell identity and spatial location**

454 To further test the extent that spatial and cell-type information is encoded in a single neuron's  
455 DNA methylome, we built a multi-task deep Artificial Neural Network (ANN) using cell-level  
456 methylome profiles in this study (Fig. 6a). Specifically, mCH rates of non-overlapping 100kb bins  
457 from 94,383 neurons were used to train and test the network with five-fold cross-validation. The  
458 ANN was able to predict subtype identity and spatial location simultaneously for each testing  
459 cell with 95% and 89% accuracies, respectively (Fig. 6b-d). Importantly, the location prediction  
460 accuracy using DNA methylation is significantly higher than only using the spatial distribution  
461 information of each subtype (overall accuracy increased by 38%, Extended Data Fig. 9b),  
462 suggesting that spatial diversity is well-preserved in the neuronal DNA methylome. We did,  
463 however, notice errors in location prediction in a few cell types, most notably in MGE and CGE  
464 derived inhibitory neurons (Fig. 6e, Extended Data Fig. 9b). This finding is consistent with  
465 previous transcriptome based studies<sup>22</sup>, suggesting these inhibitory neurons do not display  
466 strong cortical region specificity.

467 Next, we selected the features (100kb bins) that capture most spatial information (Fig. 6f, see  
468 Methods), and found that genes related to neuronal system development are highly enriched in  
469 these bins (Fig. 6g, h). Many cell type marker genes are also located in these bins, such as  
470 *Foxp2* (Fig. 6f). In addition to distinguishing L6-CT neurons from other cell types, *Foxp2* shows  
471 notably mCH difference among different dissected regions in L6-CT (Fig. 6l), indicating the  
472 extensive impact of neuron spatial origin on their methylomes.



## 473 **Discussion**

474 In this study, we describe the generation and analysis of a comprehensive single-cell DNA  
475 methylation atlas for the mouse brain, encompassing over 110,000 methylomes; the largest  
476 methylation dataset for any organism to date. By profiling of 45 brain regions, a total of 161  
477 subtypes: 68 excitatory, 77 inhibitory, and 16 non-neuronal subtypes were classified using the  
478 three-levels of iterative clustering. These subtypes are associated with a total of 24,208  
479 CH-DMGs and 3.9M CG-DMRs, covering 50% (1,240 Mb) of the mouse genome. Through  
480 integration with snATAC-seq (Li et al. Companion Manuscript # 11), we matched the chromatin  
481 accessibility clusters to each of the methylome subtypes and used the combined epigenomic  
482 information to predict 1.5M active-enhancer-like eDMRs, including 72% cell-type-specific  
483 elements that were missed from previous tissue level bulk studies<sup>6,65</sup>.

484 To describe cell-type specificity of genes and TF binding motifs in the context of cell type  
485 phylogeny, we defined a metric called the methylation impact score. This metric aggregates  
486 pairwise DMGs and DMRs between subtypes, and assigns them to branches of a cell type  
487 phylogeny. These assignments allow us to describe cell-type specificity at different levels of the  
488 phylogeny, potentially relating to different stages of their neuronal developmental lineages. We  
489 found that many known TF genes and their corresponding DNA-binding motifs were  
490 co-associated with the same branch in the phylogeny, supporting the biological significance of  
491 this approach. An important outcome of this analysis is the discovery of many novel TFs with  
492 high impact scores, providing a rich source of candidate TFs for future study.

493 To study the associations of eDMRs and their targeting genes, we first established the  
494 eDMR-gene landscape via correlation between the mCH rate of genes and mCG rate of DMRs.  
495 Furthermore, in the hippocampus, we also generated high-resolution single-cell 3D chromatin  
496 conformation and DNA methylome from the same cells using sn-m3C-seq. With this multi-omic  
497 dataset, we obtained cell-type-specific loops in eight cell types. The physical loops and  
498 eDMR-gene correlation loops together linked candidate enhancers to their target genes in  
499 specific cell types.

500 Through the analyses of single-cell methylome from detailed spatial brain region dissections,  
501 our brain-wide epigenomic dataset reveals extraordinary spatial diversity encoded in the DNA  
502 methylomes of neurons. The iterative clustering analysis separates fine-grained spatial  
503 information, which is accurately reproduced by the ANN trained on the single-cell methylome  
504 profiles. Moreover, the ANN also reveals additional spatial specifications within most of the  
505 subtypes, indicating continuous spatial DNA methylation gradients widely exist among cell  
506 types. The spatial gradients observed for excitatory IT neurons within distinct cortical areas are  
507 of special interest. During cortex development, glutamatergic neurons are regionalized by a  
508 proto map formed from an early developmental gradient of TF expression<sup>66,67</sup>. Similarly we  
509 observed that many TF genes and their corresponding DNA binding motifs showed gradients of  
510 DNA methylation in adult IT neurons from distinct cortical regions. Additionally, we found  
511 intra-subtype methylation gradients in DG granule cells. These CG-DMR are enriched in  
512 essential synaptic genes, suggesting the existence of a methylation gradient in the  
513 dorsal-ventral axis in the DG granule layer<sup>64</sup>.

514 Overall, we present the first single-cell resolution DNA methylomic mouse brain atlas with  
515 detailed spatial dissection and subtype level classification. Our analysis highlights the power of  
516 this dataset for characterizing cell types with both gene activity information in the coding regions  
517 and the regulatory elements in the non-coding region. This comprehensive epigenomic dataset  
518 provides a valuable resource for answering fundamental questions about gene regulation in  
519 specifying cell type spatial diversity and provides the raw material to develop new genetic tools  
520 for targeting specific cell types and functional testing of them.

## 521 **Acknowledgments**

522 We thank Dr. Yupeng He for the advice on the methylpy and REPTILE analysis. We thank Dr.  
523 Terrence Sejnowski for the advice on the ANN analysis. This work is supported by NIMH  
524 U19MH11483 to J.R.E. and E.M.C. The Flow Cytometry Core Facility of the Salk Institute is  
525 supported by funding from NIH-NCI CCSG: P30 014195. J.R.E is an investigator of the Howard  
526 Hughes Medical Institute.

527 **Author Contributions**

528 J.R.E., H.L., B.R., M.M.B., C.L., J.R.D. conceived the study. H.L., J.Z., W.T. analyzed the  
529 snmC-seq data and drafted the manuscript. J.R.E., C.L., E.A.M., J.R.D., M.M.B. edited the  
530 manuscript. J.R.E., H.L., M.M.B., A.B., J.L., S.P. coordinated the research. M.M.B., A.B., A.A.,  
531 H.L., J.L., J.R.N., A.R., J.K.O., C.O., L.B., C.F., C.L., J.R.E. generated the snmC-seq2 data.  
532 J.R.D., B.C., A.B., J.L., J.Z., A.A., J.K.O., C.L., J.R.N., C.O., L.B., C.F., R.G.C., M.M.B., J.R.E.  
533 generated the sn-m3C-seq data. S.P., M.M.B., X.H., J.L., O.B.P., Y.E.L., J.K.O., B.R. generated  
534 the snATAC-seq data. Z.Z., J.Z., E.M.C., M.M.B., J.R.E., A.B., A.A., J.R.N., C.O., L.B., C.F.,  
535 R.G.C., A.R. generated the Epi-Retro-Seq data. H.L., H.C., E.A.M., M.N., C.L. contributed to  
536 data archive/infrastructure. J.R.E. supervised the study.

537 **Competing interests**

538 J.R.E serves on the scientific advisory board of Zymo Research Inc.

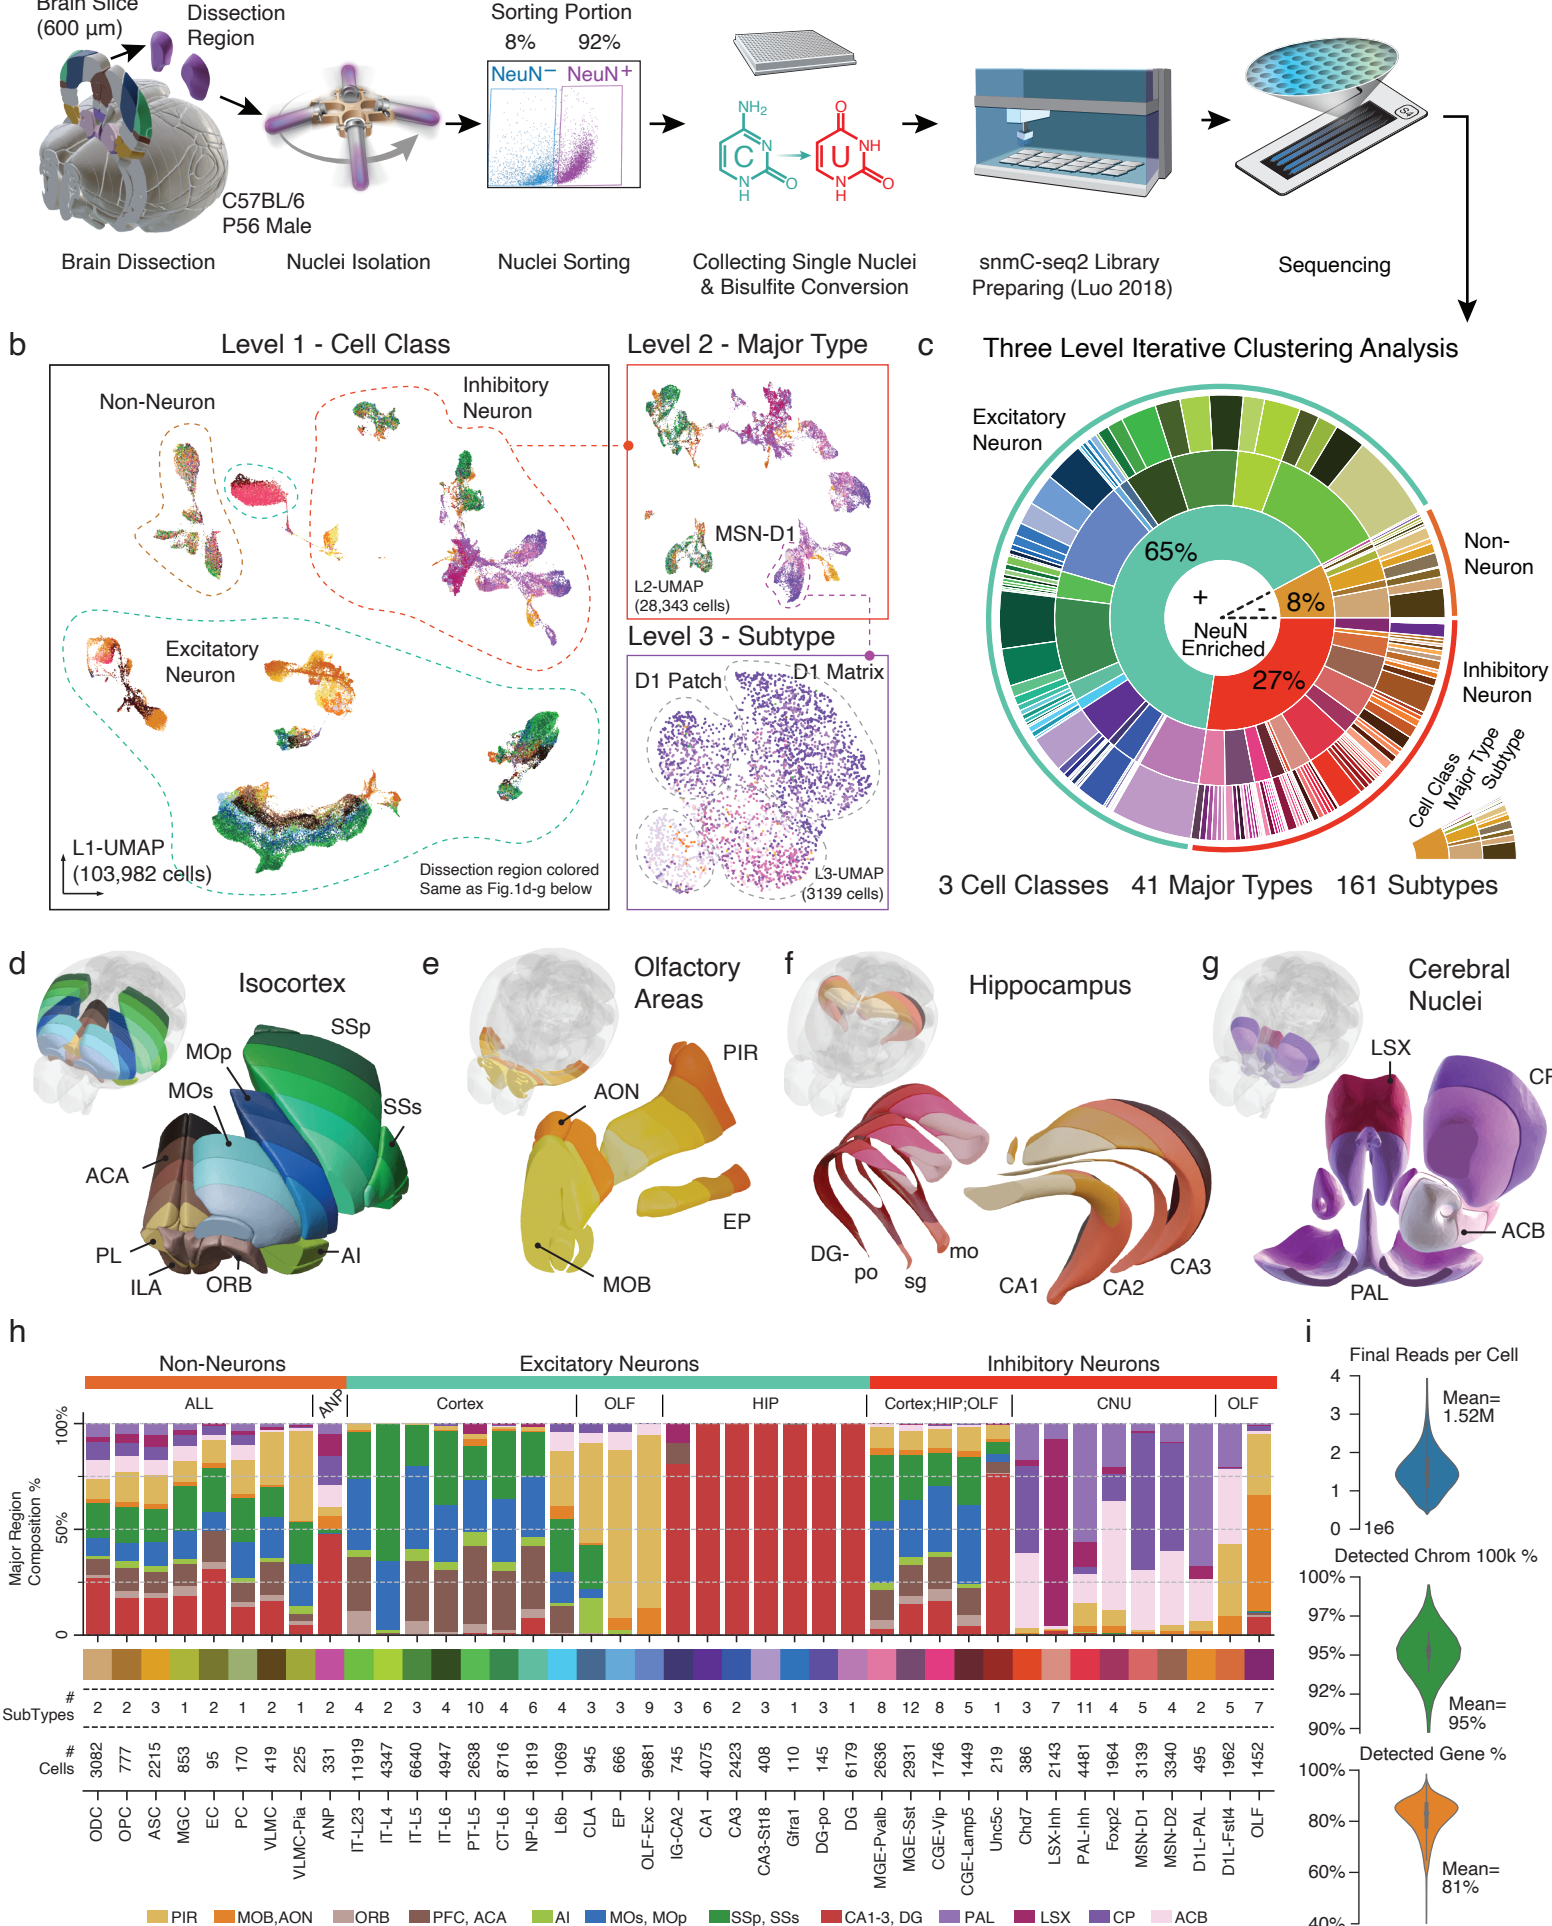

Figure 1

539 **Figure 1. A survey of single-cell DNA methylomes in the mouse brain.**

540 **a**, The workflow of dissection, FANS, and snmC-seq2 library preparation. **b**, Level1 UMAP  
541 (L1-UMAP) is colored by the dissection region; the color palette is the same as **(d-g)**. Panels  
542 show examples of Level 2 and Level 3 UMAP embeddings from iterative analyses. **c**, Sunburst  
543 of three-level iterative clustering. From inner to outer: L1 Cell Classes, L2 Major Types, and L3  
544 Subtypes. **d-g**, Brain 3D dissection models of Isocortex (**d**), olfactory areas (**e**), hippocampus  
545 (**f**), and cerebral nuclei (**g**) colored by 45 dissection regions (see Extended Data Fig. 1 for the  
546 detail labels). **h**, An integrated overview of brain region composition, subtype, and cell numbers  
547 of the major types. **i**, The number of final pass QC reads, the percentage of nonoverlapping  
548 chromosome 100kb bins detected, and the percentage of GENCODE vm22 genes detected per  
549 cell.

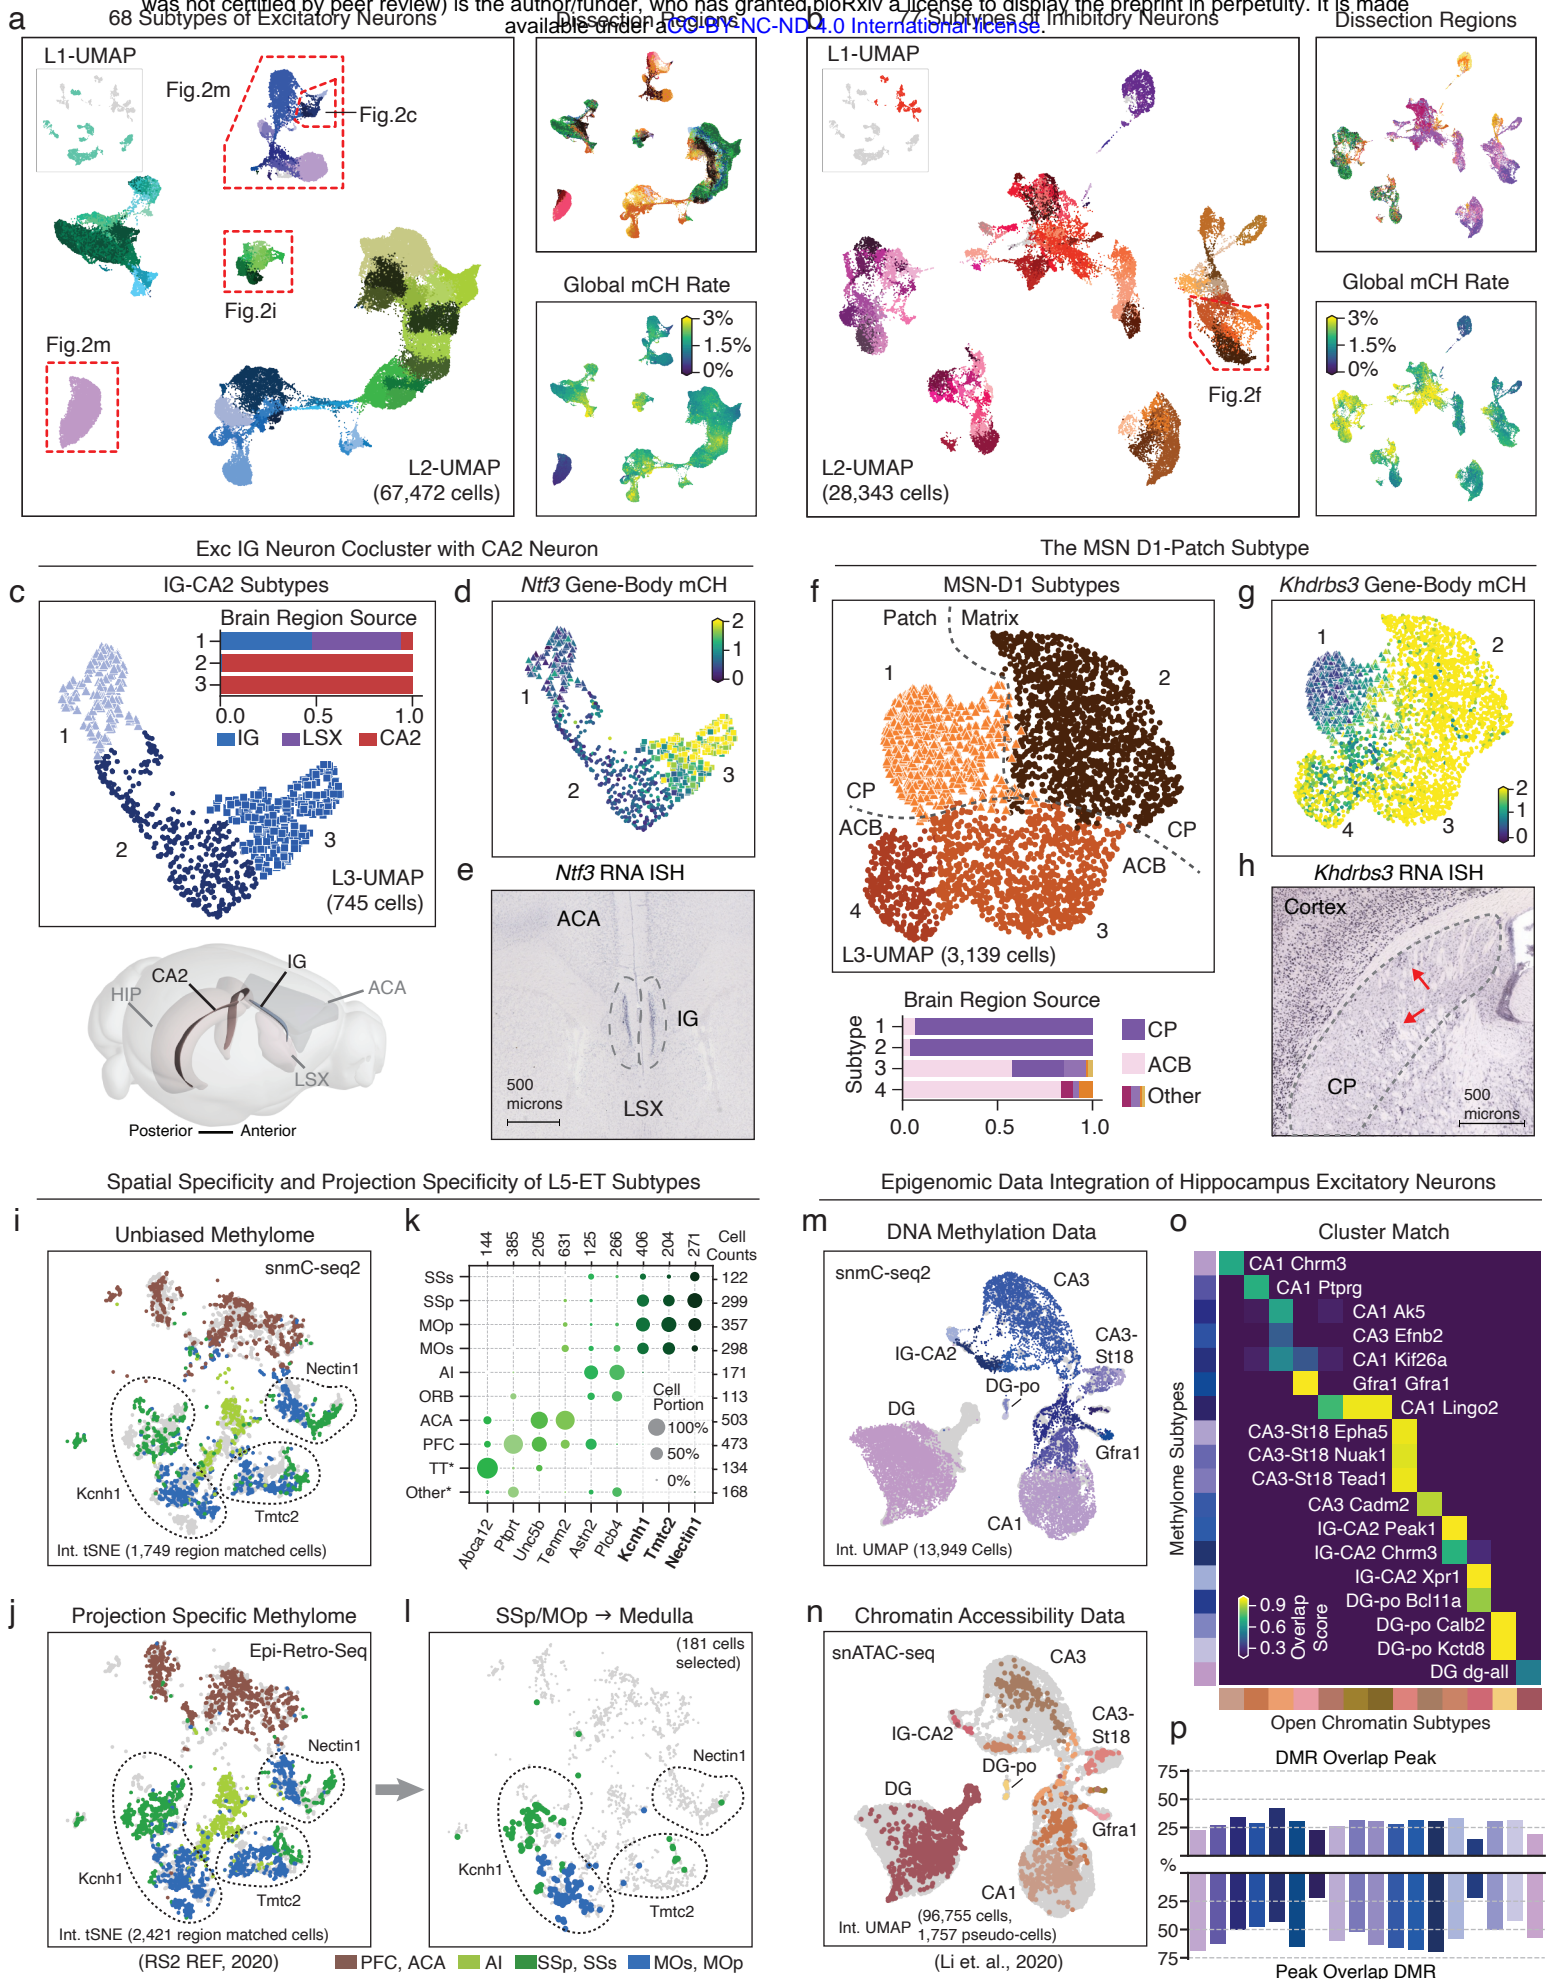

Figure 2

550 **Figure 2. Cellular and spatial epigenomic diversity of neurons.**

551 **a, b**, Level 2 UMAP of excitatory neurons (**a**) and inhibitory neurons (**b**), colored by subtypes,  
552 dissection regions, and global mCH rate. **c**, Level 3 UMAP of IG-CA2 neurons colored by  
553 subtypes. Barplot showing sub-region composition of the subtypes: 1) “Xpr1”, 2) “Chrm3”, and 3)  
554 “Peak1”. The 3D model below illustrates these regions’ spatial relationships. **d, e**, mCH rate and  
555 an ISH experiment from the Allen brain atlas (ABA) of the *Ntf3* gene. **f**, Level 3 UMAP of  
556 MSN-D1 neurons colored by subtypes. Barplot showing sub-region composition of the subtypes:  
557 1) “Khdrbs3”, 2) “Hrh1” 3) “Plxnc1” and 4) “Ntn1”. **g, h**, mCH rate (**g**) and an ISH experiment  
558 from ABA (**h**) of the *Khdrbs3* gene. **i, j**, Integration t-SNE on L5-ET cells profiled by snmC-seq2  
559 (**i**) and Epi-Retro-Seq (**j**), colored by matched dissection regions in both studies. The positions  
560 of three SSp/MOp enriched subtypes are circled and labeled by their marker gene, see  
561 Extended Data Fig. 4i for the full subtype labels. **k**, L5-ET subtype spatial composition, each  
562 column sum to 100%. **l**, Medulla projecting neurons from SSp/MOp dissections profiled by  
563 Epi-Retro-Seq. **m, n**, Integration UMAP of the hippocampus excitatory neurons profiled by  
564 snmC-seq2 (**m**) and snATAC-seq (**n**, showing pseudo-cells). **o**, Overlap score matrix matching  
565 the open chromatin subtypes to the methylome subtypes. **p**, Overlap of subtype matched DMR  
566 and ATAC peaks (see Methods).

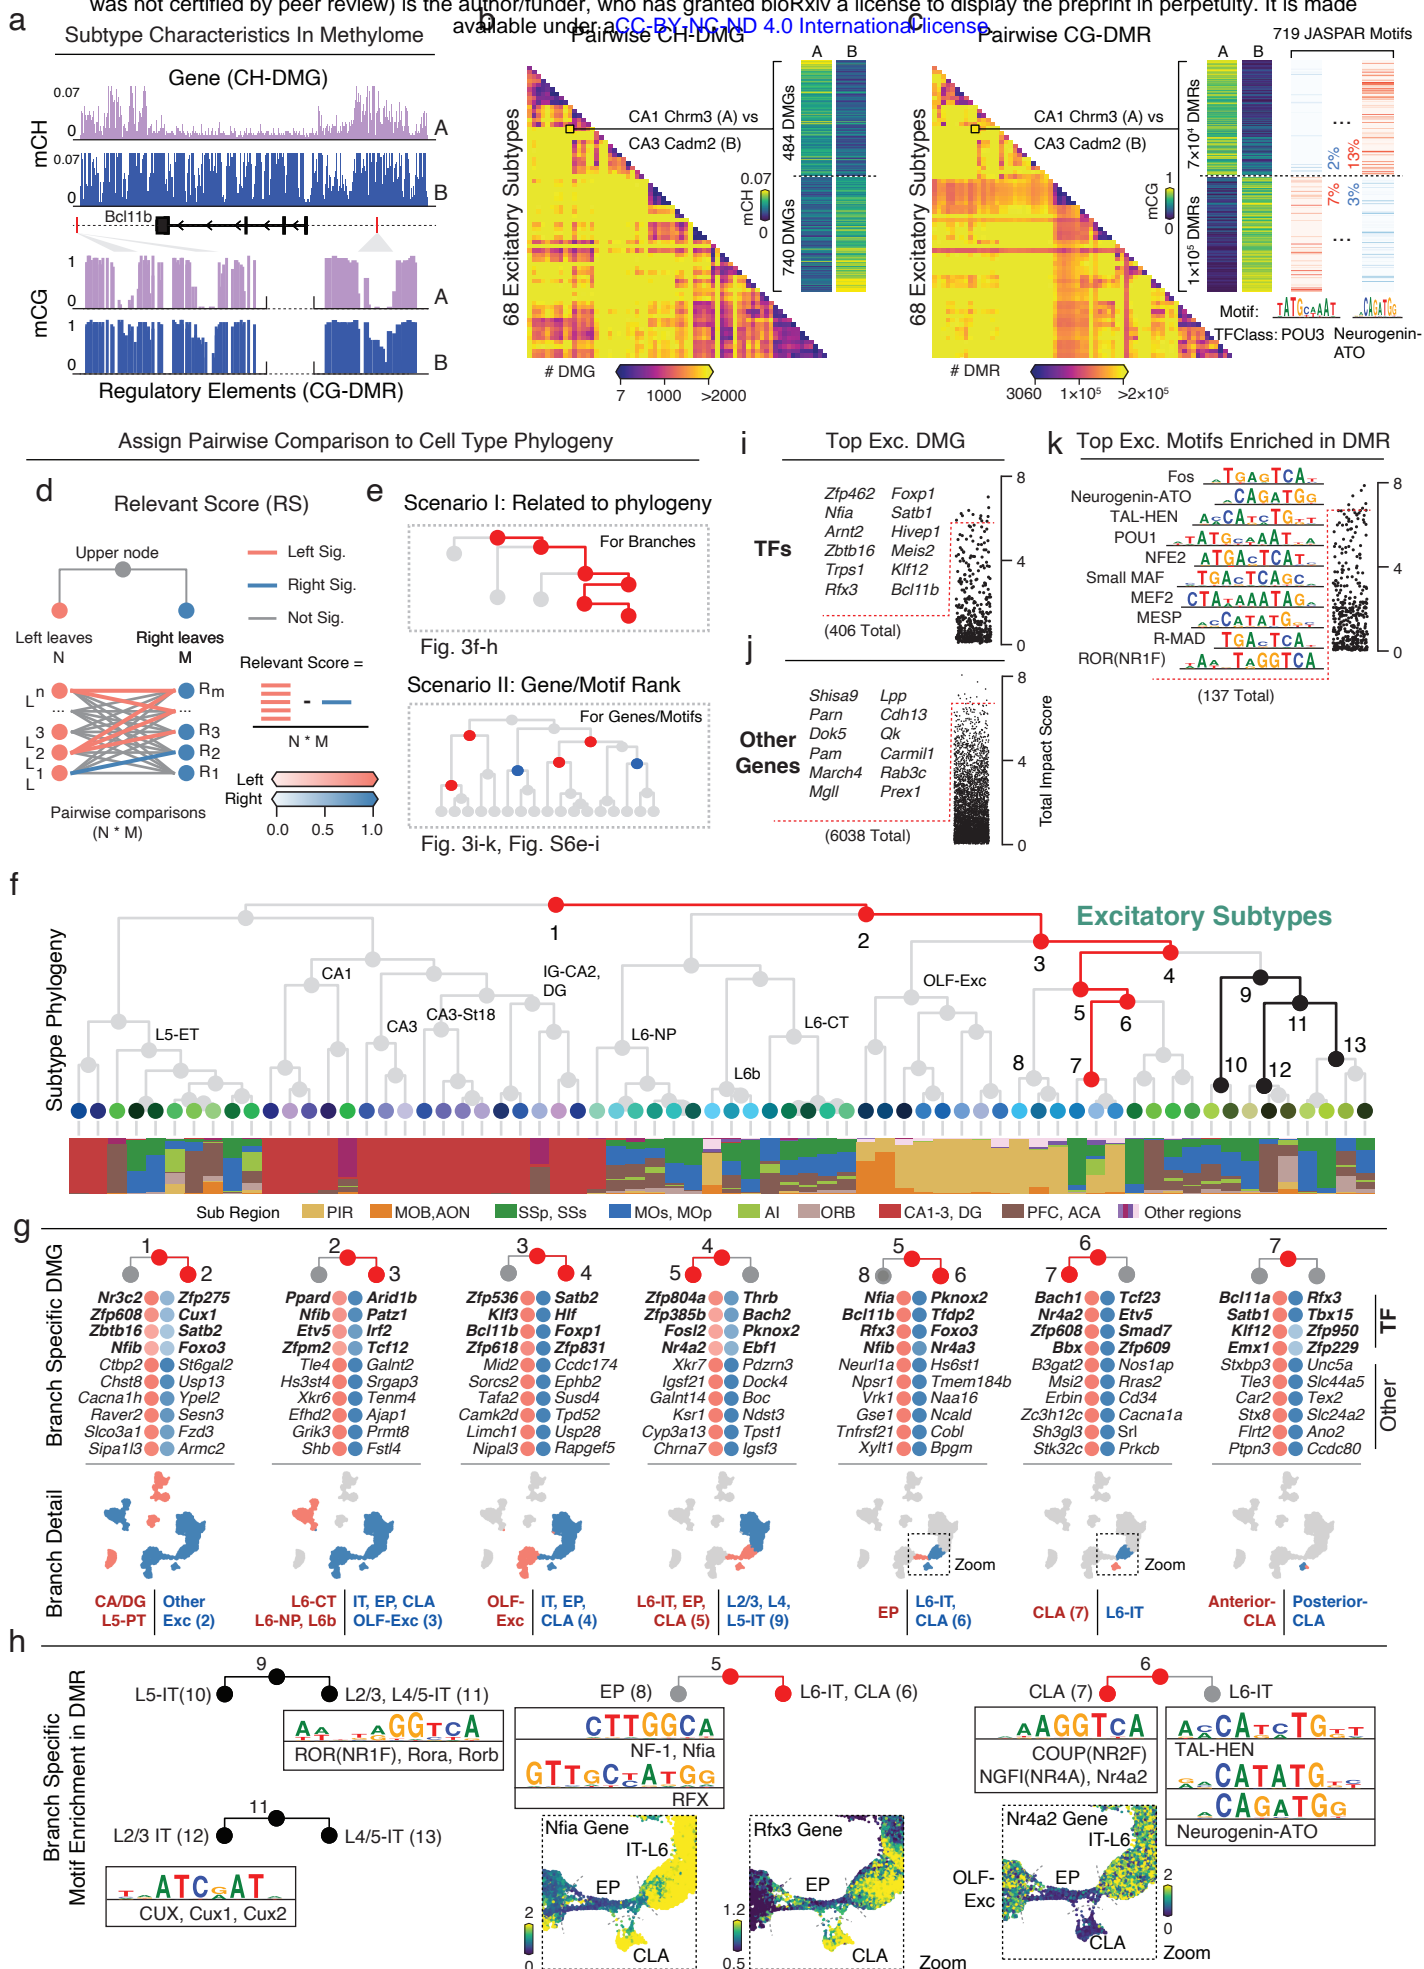

Figure 3



567 **Figure 3. Relating genes and regulatory elements to cell subtype phylogeny.**

568 **a**, Genome browser schematic of the two characteristics contained in the methylome profiles.  
569 Genes used here are *Bcl11b*, with mCH and mCG rates from “CA1 Chrm3” (A) and “CA3  
570 *Cadm2*” (B). **b, c**, Pairwise CH-DMG (**b**) or CG-DMR (**c**) counts heatmap between 68 excitatory  
571 subtypes. The detailed example from the same cluster pair as in (**a**). In each DMR set, we  
572 further scan the occurrence of 719 JASPAR motifs, two differentially enriched motifs from POU3  
573 and Neurogenin-ATO family are shown for the example pair in (**c**). **d-e**, Schematic of impact  
574 score calculation (**d**) and two scenarios of discussing impact scores (**e**). **f**, Excitatory subtype  
575 phylogeny tree. Leaf nodes are colored by subtypes, and the barplot shows subtype  
576 composition. The numbered nodes correspond to the panels below. **g**, Top impact scores of  
577 ranked genes for the left and right branches of node 1-7. Top four TF genes are in bold, followed  
578 by other protein-coding genes. The scatter plot below shows the L2-UMAP of excitatory cells  
579 (from Fig. 2a) colored by cells involved in each branch. **h**, Branch specific TF motif families. The  
580 zoomed UMAP plots show particular TF genes in those families, whose differential mCH rate  
581 concordant with their motif enrichment. **i-k**, Total impact of TFs (**i**), TF motifs (**k**), and other  
582 protein-coding genes (**j**). Top ranked items are listed on the left.

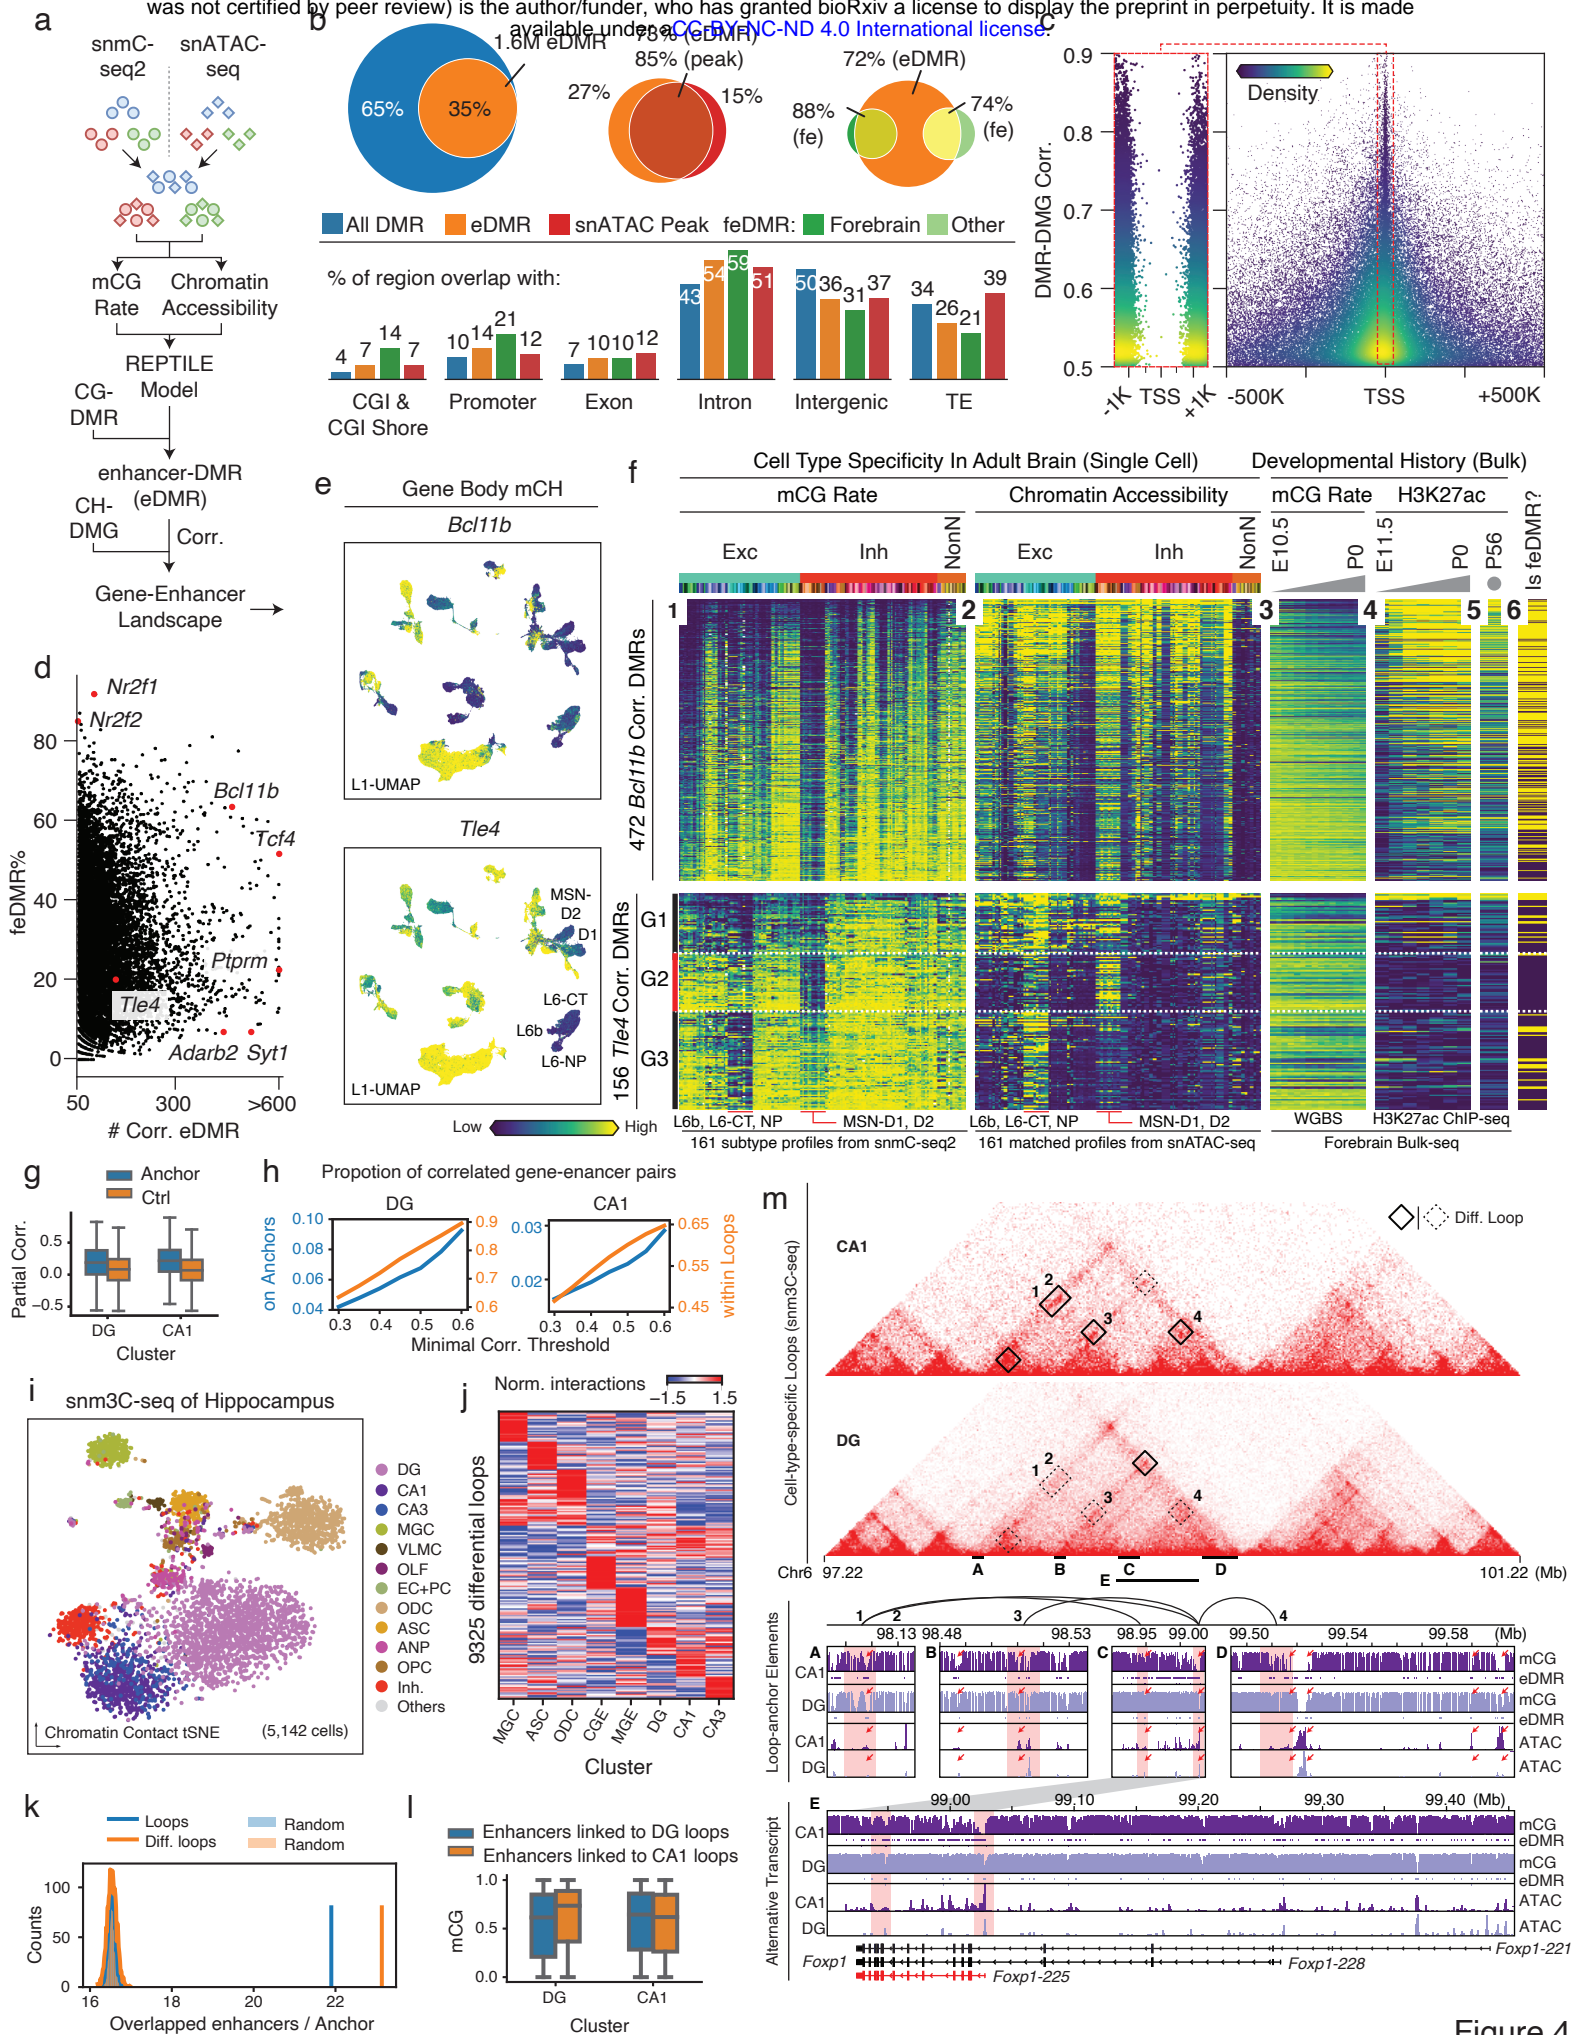

Figure 4

583 **Figure 4. Gene-enhancer landscapes in neuronal subtypes.**

584 **a**, Schematic of enhancer calling using matched DNA methylome and chromatin accessibility  
585 subtype profiles. The REPTILE algorithm was deployed followed by building the gene-enhancer  
586 landscape through their methylation correlation. **b**, Overlap of regulatory elements identified in  
587 this study, and other epigenomic studies (snATAC-seq peaks from Li. et al, Companion  
588 Manuscript 11; fetal enhancer DMRs<sup>6</sup>). **c**, DMR-DMG correlation (y-axis) and the distance  
589 between DMR center and gene TSS (x-axis), each point is a DMR-DMG pair colored by kernel  
590 density. **d**, Percentage of positively correlated eDMR that overlap with forebrain feDMR (from  
591 He et al.<sup>6</sup>). Each point is a gene, while x-axis is the number of positively correlated eDMRs to  
592 each gene. **e**, The gene body mCH rate of *Bcl11b* (top) and *Tle4* (bottom) gene. **f**, The predicted  
593 enhancer landscape of *Bcl11b* (top) and *Tle4* (bottom). Each row is a correlated eDMR to the  
594 gene, columns from left to right are: (1) mCG rate and (2) ATAC FPKM in 161 subtypes; (3) bulk  
595 developing forebrain tissue mCG rate<sup>6</sup> and (4) H3K27ac FPKM<sup>68</sup>; (5) adult frontal cortex  
596 H3K27ac<sup>2</sup>; and (6) is a feDMR or not<sup>6</sup>. **g**, Partial correlation between mCG of enhancers and  
597 mCH of genes on separated loop anchors of DG (left) and CA1 (right) compared to random  
598 anchors with comparable distance (n=4,171, 4,036, 4,326, 5,133). **h**, Proportion of loop  
599 supported enhancer-gene pairs among those linked by correlation analyses surpassing different  
600 correlation thresholds. **i**, t-SNE of sn-m3C-seq cells (n=5,142) colored by clusters. Cluster labels  
601 were predicted using the model trained with snmC-Seq data, and some major cell-types were  
602 merged. **j**, Interaction level of 9,325 differential loops in eight clusters at 25kb resolution. Values  
603 shown are z-score normalized across rows and columns. **k**, Number of enhancers per loop  
604 anchor (blue) or per differential loop anchor (orange) compared to randomly selected 25kb  
605 regions across the genome. The permutation was repeated for 2,000 times. **l**, mCG of  
606 enhancers linking to DG specific loops (blue, n=13,854) and CA1 specific loops (orange,  
607 n=14,373) in DG (left) or CA1 (right). **m**, Comprehensive epigenomic signatures surrounding  
608 *Foxp1*. The triangle heatmap shows CA1 and DG chromatin contacts with differential loops  
609 labeled with black boxes; the next genome browser section shows detail mCG and ATAC  
610 profiles near four CA1-specific loops' anchors, with red rectangles indicate loop anchor and red  
611 arrows indicate notable regulatory elements; genome browser image depicts the mCG and  
612 ATAC profiles at the *Foxp1* gene. The elements of boxplots in (**g**) and (**l**) are defined as: center  
613 line, median; box limits, first and third quartiles; whiskers, 1.5× interquartile range.



614 **Figure 5. Brain-wide spatial gradients of DNA methylation.**

615 **a**, L1-UMAP for cortex IT neurons colored by dissection regions. **b**, 2-D layout of twenty-one  
616 dissection regions profiled in this study, colored by dissection regions. **c**, IT spatial group  
617 phylogeny. The top three nodes separate four layers, and downstream nodes separate  
618 dissection regions (see Extended Data Fig. 8a for details). **d**, **e**, The top layer (**d**) and dissection  
619 region (**e**) related TFs and JASPAR motifs ranked by total impact score (see Methods). **f**, Gene  
620 body mCH rate of TF genes in (**e**) using the same layout as (**b**). **g**, L3-UMAPs for DG granule  
621 cells colored by cell global mCH rate and dissection regions. **h**, Compound figure showing four  
622 DG gradient cell groups and the two groups of gradient DMR separated by their sign of  
623 correlation to the cell's global mCH level. **i**, **j**, Gradient DMR enriched genes. Red dots indicate  
624 genes with positive (**i**) or negative (**j**) DMR enriched in their gene body. DMRs of *Tcf4* and *Rfx3*  
625 gene. Genome browser view of representative positive and negative correlated DMR enriched  
626 genes respectively. **k**, Interaction frequency decays with increasing genome distances in  
627 different groups. **l**, Correlation between global mCH and proportion of intra-domain contacts  
628 across 1,904 DG cells. **m**, Insulation scores of 9,160 domain boundaries and flanking 100kb  
629 regions.

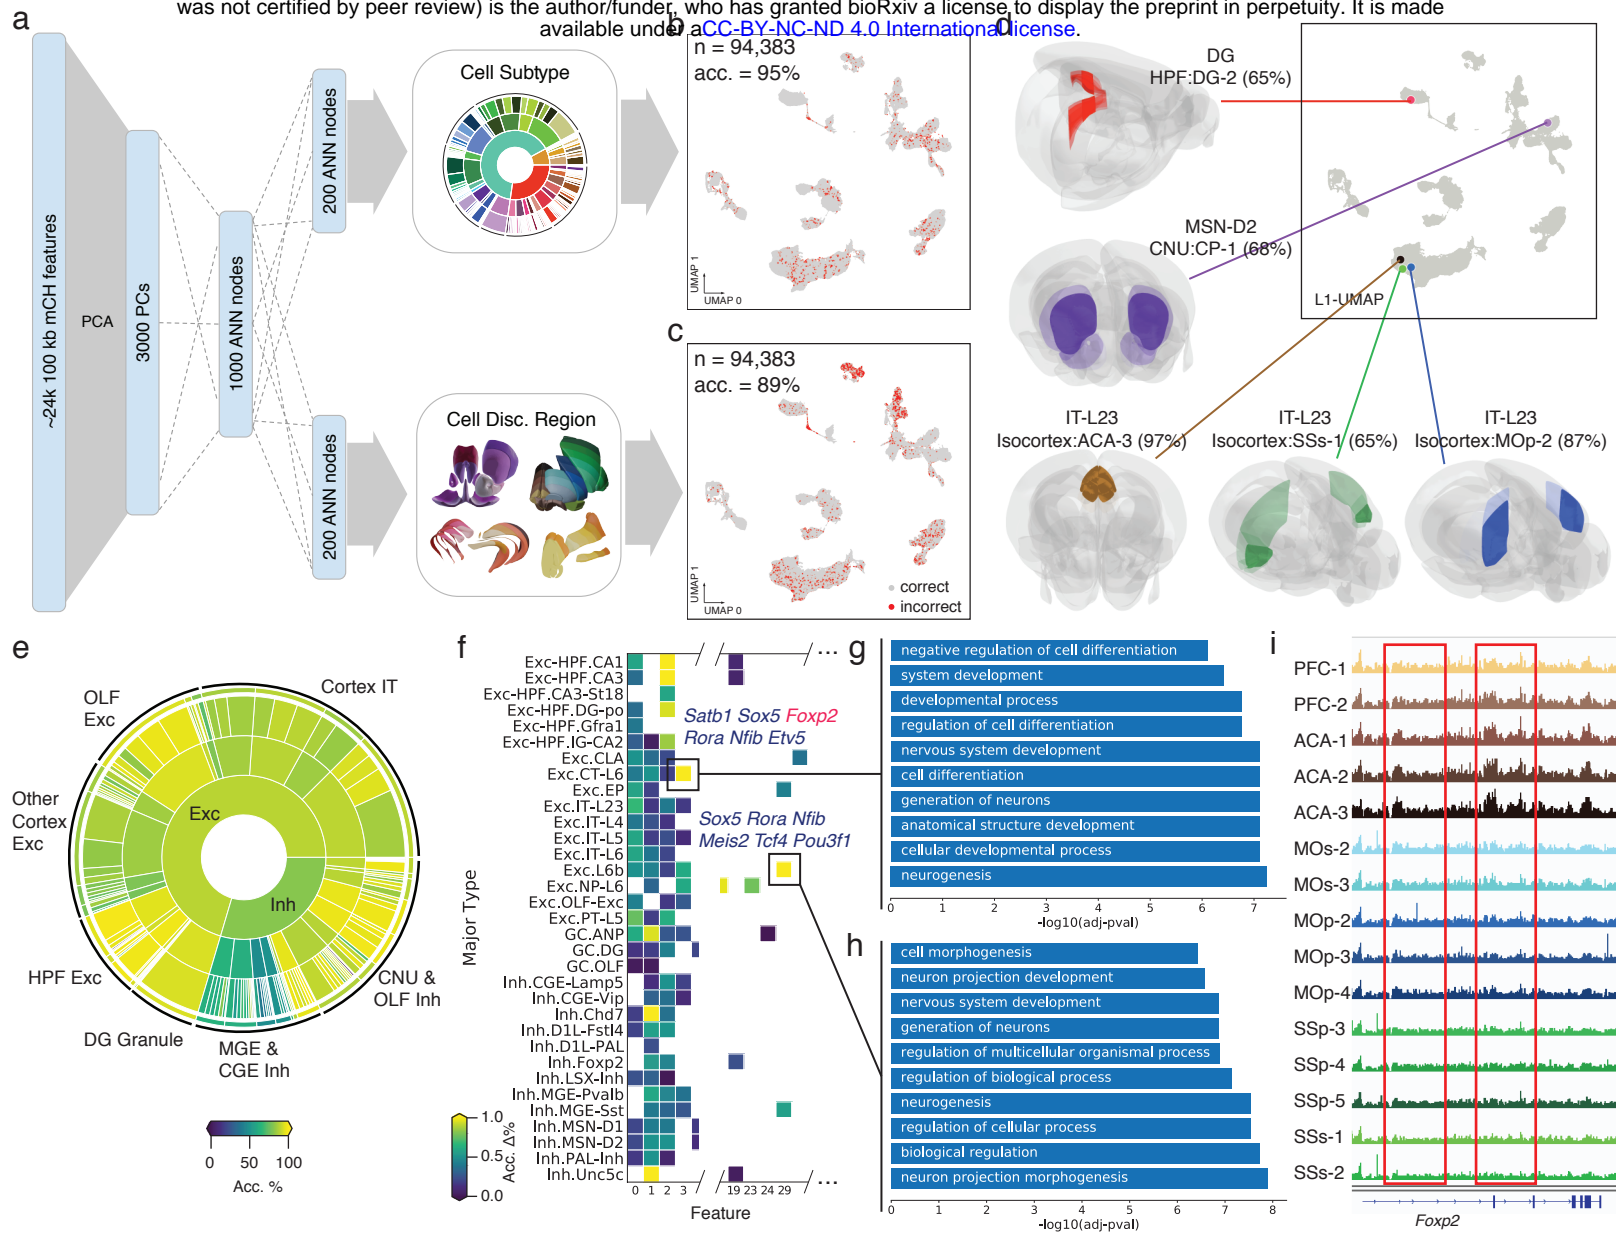

Figure 6

630 **Figure 6. A methylome-based predictive model captures both cellular and spatial**  
631 **characteristics of neurons.**

632 **a**, The architecture of the artificial neural network for predicting both cell-type identity and spatial  
633 origin. **b, c**, Performance of subtype (**b**) and dissection region (**c**) predictions. incorrect  
634 predictions are colored in red on L1 UMAP. **d**, Examples of using the model to predict cell type  
635 identity and spatial location simultaneously. The color intensity denotes the probability that the  
636 cell came from the dissection region. The highest probabilities are shown in brackets. **e**, The  
637 overall predictability of spatial location for each level of neuronal types (see Extended Data Fig.  
638 9b for details). **f**, Feature importance evaluation for spatial origin prediction. **g, h**, GO term  
639 enrichment of top-loading genes of features that are important for predicting the spatial location  
640 of L6-CT (**g**) and L6b (**h**). **i**, Genome browser view of the mCH rate of the *Foxp2* gene in each  
641 cortical dissection region.

## 642 **Methods**

### 643 **Mouse brain tissues**

644 All experimental procedures using live animals were approved by the Salk Institute Animal Care  
645 and Use Committee under protocol number 18-00006. Adult (P56) C57BL/6J male mice were  
646 purchased from Jackson Laboratories and maintained in the Salk animal barrier facility on 12 h  
647 dark-light cycles with food ad-libitum for a maximum of 10 days. Brains were extracted and  
648 sliced coronally at 600  $\mu\text{m}$  from the frontal pole across the whole brain (for a total of 18 slices) in  
649 ice-cold dissection buffer containing 2.5mM KCl, 0.5mM  $\text{CaCl}_2$ , 7mM  $\text{MgCl}_2$ , 1.25mM  $\text{NaH}_2\text{PO}_4$ ,  
650 110mM sucrose, 10mM glucose, and 25mM  $\text{NaHCO}_3$ . The solution was kept ice-cold and  
651 bubbled with 95%  $\text{O}_2$  / 5%  $\text{CO}_2$  for at least 15 min before starting the slicing procedure. Slices  
652 were kept in 12-well plates containing ice-cold dissection buffers (for a maximum of 20 min) until  
653 dissection aided by an SZX16 Olympus microscope equipped with an SDF PLAPO 1XPF  
654 objective. Each brain region was dissected from slices along the anterior-posterior axis  
655 according to the Allen Brain reference Atlas CCFv3<sup>69</sup> (see Extended Data Fig. 1 for the  
656 depiction of a posterior view of each coronal slice). Slices were kept in ice-cold dissection media  
657 during dissection and immediately frozen in dry ice for posterior pooling and nuclei production.  
658 For nuclei isolation, each dissected region was pooled from 6-30 animals, and two biological  
659 replicas were processed for each slice.

### 660 **Nuclei isolation and Fluorescence Activated Nuclei Sorting (FANS)**

661 Nuclei were isolated as previously described<sup>2,8</sup>. Isolated nuclei were labeled by incubation with  
662 1:1000 dilution of AlexaFluor488-conjugated anti-NeuN antibody (MAB377X, Millipore) and a  
663 1:1000 dilution of Hoechst 33342 at 4°C for 1 hour with continuous shaking.  
664 Fluorescence-Activated Nuclei Sorting (FANS) of single nuclei was performed using a BD Influx  
665 sorter with an 85 $\mu\text{m}$  nozzle at 22.5 PSI sheath pressure. Single nuclei were sorted into each  
666 well of a 384-well plate preloaded with 2  $\mu\text{l}$  of Proteinase K digestion buffer (1 $\mu\text{l}$  M-Digestion  
667 Buffer, 0.1 $\mu\text{l}$  20  $\mu\text{g}/\mu\text{l}$  Proteinase K and 0.9 $\mu\text{l}$   $\text{H}_2\text{O}$ ). The alignment of the receiving 384-well  
668 plate was performed by sorting sheath flow into wells of an empty plate and making adjustments  
669 based on the liquid drop position. Single-cell (1 drop single) mode was selected to ensure the  
670 stringency of sorting. For each 384-well plate, columns 1-22 were sorted with NeuN+ (488+)



671 gate, and column 23-24 with NeuN- (488-) gate, reaching an 11:1 ratio of NeuN+ to NeuN-  
672 nuclei.

### 673 **Library preparation and Illumina sequencing**

674 Detailed methods for bisulfite conversion and library preparation were previously described for  
675 snmC-seq<sup>8,16</sup>. The snmC-seq2 and sn-m3C-seq (see below) libraries generated from mouse  
676 brain tissues were sequenced using an Illumina Novaseq 6000 instrument with S4 flowcells and  
677 150 bp paired-end mode.

### 678 **The sn-m3C-seq specific steps of library preparation**

679 Single-nucleus methyl-3C sequencing (sn-m3C-seq) was performed as previously described<sup>18</sup>.  
680 In brief, the same batch of dissected tissue samples from the dorsal dentate gyrus (DG-1 and  
681 DG-2, see Supplementary Table 2), ventral dentate gyrus (DG-3 and DG-4), dorsal  
682 hippocampus (CA-1 and CA-2), and ventral hippocampus (CA-3 and CA-4), were frozen in  
683 liquid nitrogen. The samples were then pulverized while frozen using a mortar and pestle, and  
684 then immediately fixed with 2% formaldehyde in DPBS for 10 minutes. The samples were  
685 quenched with 0.2M Glycine and stored at -80C until ready for further processing. After isolating  
686 nuclei as previously described<sup>18</sup>, nuclei were digested overnight with NlaIII and ligated for 4  
687 hours. Nuclei were then stained with Hoechst 33342 and filtered through a 0.2µM filter and  
688 sorted similarly to the snmC-seq2 samples. Libraries were generated using the snmC-seq2  
689 method.

### 690 **Mouse brain region nomenclature**

691 The mouse brain dissection and naming of anatomical structures in this study followed the Allen  
692 Mouse Brain Atlas<sup>69</sup>. Based on the hierarchical structure of the Allen CCF, we used a three-level  
693 spatial region organization to facilitate description: a. The major region, e.g., isocortex,  
694 hippocampus, b. The sub-region, e.g., MOp, SSp, within isocortex, c. The dissection region,  
695 e.g., MOp-1, MOp-2, within MOp. Supplementary Table 1 contains full names of all  
696 abbreviations used in this study.

### 697 **Analysis stages**

698 The following method sections were divided into three stages. The first stage describes  
699 mapping and generating files in the single-cell methylation-specific data format. The second

700 stage describes clustering, identifying differentially methylated genes (DMG), or integrating  
701 other datasets, which all happened at the single-cell level. The third stage describes the  
702 identification of putative cell-type-specific regulatory elements using cluster-merged  
703 methylomes. Other figure-specific analysis topics may combine results from more than one  
704 stage.

## 705 **STAGE I. MAPPING AND FEATURE GENERATION**

### 706 **Mapping and feature count pipeline**

707 We implemented a versatile mapping pipeline ([cemba-data.rtfid.io](http://cemba-data.rtfid.io)) for all the single-cell  
708 methylome based technologies developed by our group<sup>8,15,16</sup>. The main steps of this pipeline  
709 included: 1) Demultiplexing FASTQ files into single-cell; 2) Reads level QC; 3) Mapping; 4) BAM  
710 file processing and QC; 5) final molecular profile generation. The details of the five steps for  
711 snmC-seq2 were previously described<sup>16</sup>. We mapped all of the reads to the mouse mm10  
712 genome. After mapping, we calculated the methylcytosine counts and total cytosine counts for  
713 two sets of genomic regions in each cell. Non-overlapping chromosome 100kb bins of the  
714 mm10 genome (generated by “bedtools makewindows -w 100000”), were used for clustering  
715 analysis and ANN model training, and the gene body region  $\pm$  2kb defined by the mouse  
716 GENCODE vm22, were used for cluster annotation and integration with other modalities.

### 717 **sn-m3C-seq specific steps or read mapping and chromatin contact analysis**

718 Methylome sequencing reads were mapped following the TAURUS-MH pipeline as previously  
719 described<sup>18</sup>. Specifically, reads were trimmed for Illumina adaptors and then an additional 10bps  
720 was trimmed on both sides. Then R1 and R2 reads were mapped separately to the mm10  
721 genome using bismark with bowtie. The unmapped reads were collected and split into shorter  
722 reads representing the first 40bps, the last 40bps, and the middle part of the original reads (if  
723 read length > 80bp after trimming). The split reads were mapped again using Bismark with the  
724 Bowtie. The reads with MAPQ<10 were removed. To generate the methylation data, the filtered  
725 bam files from split and unsplit R1 and R2 reads were deduplicated with picard and merged into  
726 a single bam file. Methylypy (v1.4.2)<sup>70</sup> was used to generate an allc file from the bam file for  
727 every single cell. To generate the Hi-C contact map, we paired the R1 and R2 bam files where  
728 each read pair represents a potential contact. For generating contact files, read pairs where the  
729 two ends mapped within 1kbp of each other were removed.

## 730 **STAGE II. CLUSTERING RELATED**

### 731 **Single-cell methylome data quality control and preprocessing**

732 **Cell filtering.** We filtered the cells based on these main mapping metrics: 1) mCCC rate < 0.03.  
733 mCCC rate reliably estimates the upper bound of bisulfite non-conversion rate<sup>8</sup>, 2) overall mCG  
734 rate > 0.5, 3) overall mCH rate < 0.2, 4) total final reads > 500,000, 5) bismark mapping rate >  
735 0.5. Other metrics such as genome coverage, PCR duplicates rate, index ratio were also  
736 generated and evaluated during filtering. However, after removing outliers with the main metrics  
737 1-5, few additional outliers can be found.

738 **Feature filtering.** 100kb genomic bin features were filtered by removing bins with mean total  
739 cytosine base calls < 250 or > 3000. Regions that overlap with the ENCODE blacklist<sup>71</sup> were  
740 also excluded from further analysis.

741 **Computation and normalization of the methylation rate.** For CG and CH methylation, the  
742 computation of methylation rate from the methyl-cytosine and total cytosine matrices contains  
743 two steps: 1) prior estimation for the beta-binomial distribution and 2) posterior rate calculation  
744 and normalization per cell.

745 Step 1, for each cell we calculated the sample mean,  $m$ , and variance,  $v$ , of the raw mc rate  
746 ( $mc / cov$ ) for each sequence context (CG, CH). The shape parameters ( $\alpha$ ,  $\beta$ ) of the beta  
747 distribution were then estimated using the method of moments:

$$748 \alpha = m(m(1 - m)/v - 1)$$

$$749 \beta = (1 - m)(m(1 - m)/v - 1)$$

750 This approach used different priors for different methylation types for each cell and used weaker  
751 prior to cells with more information (higher raw variance).

752 Step 2, We then calculated the posterior:  $\hat{m}c = \frac{\alpha + mc}{\alpha + \beta + cov}$  ., We normalized this rate by the cell's  
753 global mean methylation,  $m = \alpha / (\alpha + \beta)$ . Thus, all the posterior  $\hat{m}c$  with 0 cov will be constant 1  
754 after normalization. The resulting normalized  $mc$  rate matrix contains no NA (not available)  
755 value, and features with less cov tend to have a mean value close to 1.

756 **Selection of highly variable features.** Highly variable methylation features were selected  
757 based on a modified approach using the scanpy package `scanpy.pp.highly_variable_genes`  
758 function<sup>72</sup>. In brief, the `scanpy.pp.highly_variable_genes` function normalized the dispersion of a  
759 gene by scaling with the mean and standard deviation of the dispersions for genes falling into a

760 given bin for mean expression of genes. In our modified approach, we reasoned that both the  
761 mean methylation level and the mean cov of a feature (100kb bin or gene) could impact *mc* rate  
762 dispersion. We grouped features that fall into a combined bin of mean and cov. We then  
763 normalized the dispersion within each *mean-cov* group. After dispersion normalization, we  
764 selected the top 3000 features based on normalized dispersion for clustering analysis.

765 **Dimension reduction and combination of different mC types.** For each selected feature, *mc*  
766 rates were scaled to unit variance and zero mean. PCA was then performed on the scaled *mc*  
767 rate matrix. The number of significant PCs was selected by inspecting the variance ratio of each  
768 PC using the elbow method. The CH and CG PCs were then concatenated together for further  
769 analysis in clustering and manifold learning.

## 770 **Consensus clustering**

771 **Consensus clustering on concatenated PCs.** We used a consensus clustering approach  
772 based on multiple Leiden-clustering<sup>73</sup> over K-Nearest Neighbor (KNN) graph to account for the  
773 randomness of the Leiden clustering algorithms. After selecting dominant PCs from PCA in both  
774 mCH and mCG matrix, we concatenated the PCs together to construct a KNN graph using  
775 *scanpy.pp.neighbors* with euclidean distance. Given fixed resolution parameters, we repeated  
776 the Leiden clustering 300 times on the KNN graph with different random starts and combined  
777 these cluster assignments as a new feature matrix, where each single Leiden result is a feature.  
778 We then used the outlier-aware DBSCAN algorithm from the scikit-learn package to perform  
779 consensus clustering over the Leiden feature matrix using the hamming distance. Different  
780 epsilon parameters of DBSCAN are traversed to generate consensus cluster versions with the  
781 number of clusters that range from minimum to the maximum number of clusters observed in  
782 the multiple Leiden runs. Each version contained a few outliers that usually fall into three  
783 categories: 1. Cells located between two clusters that had gradient differences instead of clear  
784 borders, e.g., border of IT layers; 2. Cells with a low number of reads that potentially lack  
785 information in essential features to determine the specific cluster. 3. Cells with a high number of  
786 reads that were potential doublets. The amount of type 1 and 2 outliers depends on the  
787 resolution parameter and is discussed in the choice of the resolution parameter section. The  
788 type 3 outliers were very rare after cell filtering. The supervised model evaluation below then  
789 determined the final consensus cluster version.

790 **Supervised model evaluation on the clustering assignment.** For each consensus clustering  
791 version, we performed a Recursive Feature Elimination with Cross-Validation (RFECV)<sup>74</sup>  
792 process from the scikit-learn package to evaluate clustering reproducibility. We first removed the  
793 outliers from this process, and then we held out 10% of the cells as the final testing dataset. For  
794 the remaining 90% of the cells, we used ten-fold cross-validation to train a multiclass prediction  
795 model using the input PCs as features and *sklearn.metrics.balanced\_accuracy\_score*<sup>75</sup> as an  
796 evaluation score. The multiclass prediction model is based on *BalancedRandomForestClassifier*  
797 from the *imblearn* package that accounts for imbalanced classification problems<sup>76</sup>. After training,  
798 we used the 10% testing dataset to test the model performance using the  
799 *balanced\_accuracy\_score* score. We kept the best model and corresponding clustering  
800 assignments as the final clustering version. Finally, we used this prediction model to predict  
801 outliers' cluster assignments, we rescued the outlier with prediction probability > 0.3, otherwise  
802 labeling them as outliers.

803 **Manifold learning for visualization.** In each round of clustering analysis, the t-SNE<sup>77,78</sup> and  
804 UMAP<sup>19</sup> embedding were run on the PC matrix the same as the clustering input using the  
805 implementation from the scanpy<sup>72</sup> package. The coordinates from both algorithms were in  
806 Supplementary Table 5.

807 **Choice of resolution parameter.** Choosing the resolution parameter of the Leiden algorithm is  
808 critical for determining the final number of clusters. We selected the resolution parameter by  
809 three criteria: 1. The portion of outliers < 0.05 in the final consensus clustering version. 2. The  
810 ultimate prediction model accuracy > 0.9. 3. The average cell per cluster  $\geq 30$ , which controls  
811 the cluster size to reach the minimum coverage required for further epigenome analysis such as  
812 DMR calls. All three criteria prevented the over-splitting of the clusters; thus, we selected the  
813 maximum resolution parameter under meeting the criteria using a grid search.

#### 814 **Pairwise Differential Methylated Gene (DMG) identification**

815 We used a pairwise strategy to calculate DMGs for each pair of clusters within the same round  
816 of analysis. We used the gene body  $\pm 2$ kb regions of all the protein-coding and long non-coding  
817 RNA genes with evidence level 1 or 2 from the mouse GENCODE vm22. We used the per  
818 cluster normalized mCH rate (same as the "Computation and normalization of the methylation  
819 rate" in the clustering step above) to calculate markers between all neuronal clusters. We  
820 compared non-neuron clusters separately using the normalized mCG rate. For each pairwise  
821 comparison, we used the Wilcoxon test to select genes that have a significant decrease

822 (hypo-methylation). Marker gene was chosen based on adjusted P-value  $< 1e-3$  with multitest  
823 correction using Benjamini-Hochberg procedure, delta normalized methylation level change  $<$   
824  $-0.5$  (hypo-methylation), AUROC  $> 0.8$ . We required each cluster to have  $\geq 5$  DMGs compared  
825 to any other cluster. Otherwise, the smallest cluster that did not meet this criterion was merged  
826 to the closest cluster based on cluster centroids euclidean distance in the PC matrix that was  
827 used for clustering. Then the marker identification process was repeated until all clusters found  
828 enough marker genes.

### 829 **Three-level of iterative clustering analysis**

830 Based on the consensus clustering steps described above, we used an iterative approach to  
831 cluster the data into three levels of categories. In the first level termed CellClass, clustering  
832 analysis is done using all cells, and then manually merged into three canonical classes:  
833 excitatory neurons, inhibitory neurons, and non-neurons based on marker genes. Then within  
834 each CellClass, we performed all the preprocessing and clustering steps again to get clusters  
835 for the MajorType level using the same stop criteria. And within each MajorType, we obtained  
836 clusters for the SubType level. All clusters' annotations and relationships are in Supplementary  
837 Table 4.

### 838 **Subtype phylogeny tree**

839 To build the phylogeny tree of subtypes, we selected the top 50 genes that show the most  
840 number of significant changes for each subtypes' pairwise comparisons. We then used the  
841 union of these genes from all subtypes and obtained a total of 2503 unique genes. We  
842 calculated the median mCH rate level of these genes in each subtype and applied bootstrap  
843 resampling based hierarchical clustering with average linkage and the correlation metric using  
844 the R package pvclust<sup>79</sup> (v.2.2).

### 845 **Impact Score and Total Impact Score**

846 We defined the Impact Score (IS) as a way to summarize pairwise comparisons for two subtype  
847 groups, where one group A contains  $M$  clusters, the other group B contains  $N$  clusters. For each  
848 gene or motif, the number of total related pairwise comparisons is  $M \times N$ , the number of  
849 significant comparisons with desired change (hypo-methylation for gene or enrichment for motif)  
850 in group A is  $a$ , and in group B is  $b$ . The IS is then calculated as  $IS_A = \frac{a-b}{M \times N}$  and

851  $IS_B = \frac{b-a}{M \times N}$  for the two directions. For either group, IS ranges from -1 to 1 and 0 means no  
852 impact, 1 means full impact, -1 means full impact in the other group.

853 We explored two scenarios of using the IS to describe cluster characteristics (Fig. 3e). The first  
854 scenario is considering each pair of branches in the subtype phylogeny tree as group A and  
855 group B. Thus the IS can quantify and rank genes or motifs to the upper nodes based on the  
856 leaves' pairwise comparisons (Fig. 3i-h). The second scenario was a summarization of the total  
857 impact for specific genes or motifs regarding the phylogeny tree based on the calculation in the  
858 first scenario. In a subtype phylogeny tree with  $n$  subtypes, the total non-singleton node was  
859  $n-1$ , and each node  $i$  had a height  $h_i$  and associated  $IS_A$  for one of the branches ( $IS_B = -IS_A$ ).  
860 The node height weighted total IS was then calculated by:

$$861 \quad IS_{total} = \sum_{i=1}^{n-1} h_i \cdot |IS_A|$$

862 The larger total IS indicated a gene or motif show more cell-type-phylogeny related significant  
863 changes. The height weight intended to focus on the higher branches (major cell type  
864 separations), but the total IS can also be calculated in a sub-tree or any combination of  
865 interests, to rank gene and motifs most related to that combination (See Figure 5 related  
866 methods about calculating layer and region total IS from the same tree).

### 867 **Integration with snATAC-seq data**

868 A portion of exact same brain tissue sample used in this study for methylome profiling was also  
869 processed with snATAC-seq in a parallel study about chromatin accessibility (Li et al.,  
870 Companion Manuscript # 11). The final high-quality snATAC-seq cells were assigned to 160  
871 chromatin accessibility clusters (a-clusters). The snATAC specific data analysis steps are  
872 described in Li et al. Here, we performed cross-modality data integration and label-transferring  
873 to assign the 160 a-clusters to the 161 methylome subtypes in the following steps:

- 874 1. We manually grouped both modalities into five integration groups (e.g., all IT neurons as  
875 a group) and only performed the integration of cells within the same group to decrease  
876 computation time. These groups were distinct in the clustering steps of both modalities  
877 and can be matched with great confidence using known marker genes. Step 2-6 were  
878 repeated for each group, see Extended Data Fig. 5 for the group design.
- 879 2. We used a similar approach as described above to identify pairwise differential  
880 accessible genes (DAG) between all pairs of snATAC-seq clusters. The cutoff for DAG is  
881 adjusted P-value < 1e-3, fold change > 2, AUROC > 0.8.

- 882 3. We then gather DMGs from related subtypes' comparisons in the same group. Both  
883 DAGs and DMGs were filtered by recurring in > 5 pairwise comparisons. The  
884 intersection of the remaining genes was used as the feature set of integration.
- 885 4. After identifying DAGs using cell level snATAC-seq data, we merged the snATAC-seq  
886 cells into pseudo-cells to increase snATAC-seq data coverage. Within each a-cluster, we  
887 did a K-means clustering ( $K = \# \text{ of cells in that cluster} / 50$ ) on the same PCs that were  
888 used in snATAC-seq clustering. We discarded (about 5% of the cells) small K-means  
889 clusters with < 10 cells and merged each remaining K-means cluster into a pseudo-cell.  
890 Each pseudo-cell had about 50 times more fragments than a single cell.
- 891 5. We then used the MNN based Scanorama<sup>39</sup> method with default parameters to integrate  
892 the snmC-seq cells and snATAC-seq pseudo-cells using genes from 3. After Scanorama  
893 integration, we did co-clustering on the integrated PC matrix using the clustering  
894 approaches described above.
- 895 6. We used the intermediate clustering assignment from 5 to calculate the overlap score  
896 (see the section below) between the original methylome subtypes and the a-clusters. We  
897 used the overlap score > 0.3 to assign snATAC-seq clusters to each methylome subtype.  
898 For those subtypes that have no match under this threshold, we assign the top a-cluster  
899 ranked by the overlap score.

#### 900 **Overlap Score (OS)**

901 We used the overlap score to match a-cluster and methylome subtypes together. The overlap  
902 score range from 0 to 1 was defined as the sum of the minimum proportion of samples in each  
903 cluster that overlapped within each co-cluster<sup>26</sup>. A higher score between one methylome  
904 subtype and one a-cluster indicates they consistently co-clustered within one or more  
905 co-clusters. Besides matching clusters in integration analysis, the OS was also used in two  
906 other cases: 1. To quantify replicates and region overlaps over methylome subtypes (Extended  
907 Data Fig. 2e-g); 2. To quantify the overlap of each L5-ET subtype overlapping with “soma  
908 location” and “projection target” labels from epi-retro-seq cells (Extended Data Fig. 4k) through  
909 integration with the epi-retro-seq dataset.



## 910 **STAGE III. CELL-TYPE-SPECIFIC REGULATORY ELEMENTS**

### 911 **Differentially Methylated Region (DMR) analysis**

912 After clustering analysis, we used the subtype cluster assignments to merge single-cell ALLC  
913 files into the pseudo-bulk level and then used methylpy<sup>70</sup> *DMRfind* function to calculate mCG  
914 DMRs across all clusters. The base calls of each pair of CpG sites were added before analysis.  
915 In brief, the methylpy function used a permutation-based root-mean-square test of  
916 goodness-of-fit to identify differentially methylated sites simultaneously across all samples  
917 (subtypes in this case), and then merge the DMS within 250bp into DMR. We further excluded  
918 DMS calls that have low absolute mCG rate difference by using a robust-mean-based approach.  
919 For each DMR that was merged from the DMS, we order all the samples by their mCG rate and  
920 calculate the robust mean  $m$  using the samples between 25th and 75th percentiles. We then  
921 reassign hypo-DMR and hyper-DMR to each sample when a region met two criteria: 1) the  
922 sample mCG rate of this DMR is lower than  $(m - 0.3)$  for hypo-DMR or  $(m + 0.3)$  for hyper-DMR,  
923 and 2) the DMR is originally a significant hypo- or hyper-DMR in that sample judged by  
924 methylpy. DMRs without any hypo- or hyper-DMR assignment were excluded from further  
925 analyses.

### 926 **Enhancer prediction using DNA methylation and chromatin accessibility**

927 We performed enhancer prediction using the REPTILE<sup>51</sup> algorithm. The REPTILE is a  
928 random-forest-based supervised method that incorporates different sources of epigenomic  
929 profiles with base-level DNA methylation data to learn and then distinguish the epigenomic  
930 signatures of enhancers and genomic background. We trained the model in a similar way as in  
931 the previous studies<sup>6,51</sup> using CG methylation, chromatin accessibility of each subtype, and  
932 mouse embryonic stem cells (mESC). The model was first trained on mESC data and then  
933 predicted a quantitative score we termed enhancer score for each subtype's DMRs. The  
934 positives were 2kb regions centered at the summits of top 5,000 EP300 peaks in mESCs.  
935 Negatives include randomly chosen 5,000 promoters and 30,000 2kb genomic bins. The bins  
936 have no overlap with any positive region or gene promoter<sup>6</sup>.  
937 Methylation and chromatin accessibility profiles in bigwig format for mESC were from the GEO  
938 database (GSM723018). The mCG rate bigwig file was generated from subtype-merged ALLC  
939 files using the ALLCools package (<https://github.com/lhqing/ALLCools>). For chromatin

940 accessibility of each subtype, we merged all fragments from snATAC-seq cells that were  
941 assigned to this subtype in the integration analysis and used “*deeptools bamcoverage*” to  
942 generate CPM normalized bigwig files. All bigwig file bin sizes were 50bp.

### 943 **Motif enrichment analysis**

944 We used 719 motif PWMs from the JASPAR 2020 CORE vertebrates database<sup>43</sup>, where each  
945 motif was able to assign corresponding mouse TF genes. The specific DMR sets used in each  
946 motif enrichment analysis are described in figure specific methods below. For each set of  
947 DMRs, we standardized the region length to the center  $\pm$  250bp and used the FIMO tool from  
948 the MEME suite<sup>80</sup> to scan the motifs in each enhancer with the log-odds score p-value  $< 10^{-6}$  as  
949 the threshold. To calculate motif enrichment, we use the adult non-neuronal mouse tissue  
950 DMRs<sup>65</sup> as background regions unless expressly noted. We subtracted enhancers in the region  
951 set from the background, and then scanned the motifs in background regions using the same  
952 approach. We then used Fisher’s exact test to find motifs enriched in the region set, and the  
953 Benjamini-Hochberg procedure to correct multiple tests. We used the TFClass<sup>81</sup> classification to  
954 group TFs with similar motifs.

### 955 **DMR-DMG partial correlation**

956 To calculate DMR-DMG partial correlation, we used the mCG rate of DMRs and the mCH rate of  
957 DMGs in each neuronal subtypes. We first used linear regression to regress out variance due to  
958 global methylation difference (using `scanpy.pp.regress_out` function), then use the residual  
959 matrix to calculate Pearson correlation between DMR and DMG pairs where the DMR center is  
960 within 1Mb the DMG’s TSSs. To generate the null distribution, we shuffled the subtype orders in  
961 both matrices and recalculated all pairs 100 times.

### 962 **Identification of loops and differential loops from sn-m3C-seq data**

963 After merging the chromatin contacts from cells belonging to the same type, we generated a .hic  
964 file of the cell-type with *Juicer tools pre. HICCUPS*<sup>82</sup> was used to identify loops in each cell-type.  
965 The loops from eight major cell-types were concatenated and deduplicated, and used as the  
966 total samples for differential loop calling. A loop-by-cell matrix was generated, where each  
967 element represents the number of contacts supporting each loop in each cell. The matrix was  
968 used as input of EdgeR to identify differential interactions with ANOVA tests. Loops with FDR  $<$   
969  $1e-5$  and min-max fold-change  $> 2$  were used as differential loops.

## 970 **FIGURE-SPECIFIC METHODS**

### 971 **Figure 1 related**

972 **3D model of dissection regions (Fig. 1d-g).** We created in-silico dissection regions based on  
973 the Allen CCFv3<sup>69</sup> 3D model using blender 2.8 that precisely follows our dissection plan. To  
974 ease visualization of all different regions, we modified the layout and removed some of the  
975 symmetric structures, but all the actual dissections were applied symmetrically to both  
976 hemispheres.

977 **Calculating the genome feature detected ratio (Fig. 1i).** The detected ratio of chromosome  
978 100kb bins and gene bodies is calculated as the percentage of bins with > 20 total cytosine  
979 coverage. Non-overlapping chromosome 100kb bins generated by “bedtools makewindows -w  
980 100000”; gene body definition from the GENCODE vm22 GTF file.

### 981 **Figure 2 related**

982 **Integration with epi-retro-seq L5-ET cells (Fig. 2i-l, Extended Data Fig. 4h-j).** Epi-retro-seq  
983 is an snmC-seq2 based method that combines retrograde AAV labeling (Companion Manuscript  
984 # 11)<sup>36</sup>. The L5-ET cells’ non-overlapping chromosome 100kb bin matrix gathered by the  
985 epi-retro-seq dataset was concatenated with all the L5-ET cells from this study to do  
986 co-clustering and embedding as described in “STAGE II” above. We then calculated the OS  
987 between subtypes in this study and the “soma location” or “projection target” labels of  
988 epi-retro-seq cells. The first OS helped quantify how consistent the spatial location is between  
989 the two studies, the second OS allowed us to impute the projection targets of subtypes in this  
990 study.

### 991 **Figure 3 related**

992 **Pairwise DMR and motif enrichment analysis (Fig. 3c, h).** The total subtype DMRs were  
993 identified as described in “STAGE III” via comparing all subtypes. We then assigned DMRs to  
994 each subtype pair if the DMRs were: 1) significantly hypomethylated in only one of the subtypes;  
995 and 2) the mCG rate difference between the two subtypes > 0.4. Each subtype pair was  
996 associated with two exclusive sets of pairwise DMRs. We carried out motif enrichment analysis  
997 as described in “STAGE III” on each DMR set using the other set as background. Motifs

998 enriched in either direction were then used to calculate the impact score and were associated  
999 with upper nodes of the phylogeny.

#### 1000 **Figure 4 related**

1001 **Overlapping eDMR with genome regions (Fig. 4b).** The cluster-specific snATAC-seq peaks  
1002 were identified in Li et al. (Companion Manuscript # 11). We used “bedtools merge” to  
1003 aggregate the total non-overlap peak regions, and “bedtools intersect” to calculate the overlap  
1004 between peaks and eDMRs. The developing forebrain and other tissue feDMR were identified in  
1005 He et al.<sup>6</sup> using methylC-seq<sup>83</sup> for bulk whole-genome bisulfite sequencing (WGBS-seq). All of  
1006 the genome features used in Fig. 4b were defined as in He et al, except using an updated  
1007 mm10 CGI region and RepeatMaster transposable elements lists (UCSC table browser  
1008 downloaded on 09/10/2019, and the GENCODE vm22 gene annotation).

1009 **Assembly epigenome card (Fig. 4f) of the gene-enhancer landscape.** The eDMRs for each  
1010 gene selected by eDMR-Gene correlation > 0.3. Sections of the heatmaps in Fig. 4f were  
1011 gathered by: 1) mCG rate of each eDMR in 161 subtypes from this study, 2) snATAC  
1012 subtype-level FPKM of each eDMR in the same subtype orders. The subtype snATAC profiles  
1013 were merged from integration results as described in “STAGE II”, 3) mCG rate of each eDMR in  
1014 forebrain tissue during ten developing time points from E10.5 to P0, data from He et al.<sup>6</sup>, 4)  
1015 H3K27ac FPKM of each eDMR in 7 developing time points from E11.5 to P0, data from Gorokin  
1016 et al.<sup>68</sup>, 5) H3K27ac FPKM of each eDMR in P56 frontal brain tissue, data from Lister et al.<sup>2</sup> and  
1017 6) eDMR is overlapped with forebrain feDMR using “bedtools intersect”.

1018 **Embedding of cells with chromosome interactions (Fig. 4i).** scHiCluster<sup>84</sup> was used to  
1019 generate the t-SNE embedding of the sn-m3C-seq cells. Specifically, a contact matrix at 1Mb  
1020 resolution was generated for each chromosome of each cell. Then the matrices were smoothed  
1021 by linear convolution with pad = 1 and random walk with restart probability = 0.5. The top 20th  
1022 percentile of strongest interactions on the smoothed map was extracted, binarized, and used for  
1023 PCA. The first 20 PCs were used for t-SNE.

#### 1024 **Figure 5 related**

1025 **IT layer-dissection-region group DMG and DMR analysis (Fig. 5a-f).** In order to collect  
1026 enough cells for dissection region analysis, we only used the major types (which corresponds to  
1027 L2/3, L4, L5, and L6) of IT neurons. We grouped cells into layer-dissection-region groups and  
1028 kept groups with > 50 cells in further analysis (Extended Data Fig. 8b). We performed pairwise

1029 DMG, DMR, and motif enrichment analysis the same as the subtype analysis in Fig. 3, but using  
1030 the layer-dissection-region group labels. We then built a spatial phylogeny for these groups and  
1031 calculated impact scores based on it. To rank layer-related or dissection-region-related genes  
1032 and motifs separately, we used two sets of the branches (Extended Data Fig. 8a, upper set for  
1033 layers, lower set for regions) in the phylogeny and calculated two total impact scores using  
1034 equations in above.

1035 **DG cell group and gradient DMR analysis (Fig. 5h).** DG cells were grouped into four  
1036 even-sized groups according to cells' global mCH rates, and cutoff thresholds were 0.45%,  
1037 0.55%, and 0.69%. We then randomly chose 400 cells from each group to call gradient-DMRs  
1038 using methods described in "STAGE II". To ensure the DMRs identified between intra-DG  
1039 groups were not due to stochasticity, we also randomly sampled 15 groups of 400 cells from all  
1040 DG cells regardless of their global mCH and called DMR among them as control-DMRs (2,003  
1041 using the same filtering condition). Only 0.04% of gradient-DMRs overlapped with the  
1042 control-DMRs and thus were removed from further analysis. Pearson correlation coefficients  
1043 ( $\rho$ 's) of mCG rates of each gradient-DMR were calculated against a linear sequence [1, 2, 3, 4]  
1044 to quantify the gradient trend. DMRs with  $\rho < -0.75$  or  $\rho > 0.75$  were considered to be significantly  
1045 correlated. Weakly correlated DMRs (10%) were not included in further analysis.

1046 **DMR/DMS enriched genes (Fig. 5i-j).** To investigate the correlated DMR/DMSs enrichment in  
1047 specific gene bodies, we compare the number of DMS and cytosine inside the gene body with  
1048 the number of DMS and cytosine in the  $\pm 1$ Mb regions through Fisher's exact test. We chose  
1049 genes passing both criteria: 1) adjusted P-value  $< 0.01$  with multitest correction using  
1050 Benjamini-Hochberg procedure, and 2) overlap with  $> 20$  DMS. Gene ontology analysis of  
1051 DMR/DMS enriched genes was carried out using GOATOOLS<sup>85</sup> all protein coding genes with  
1052 gene body length  $> 5$ kb were used as background to prevent gene length bias.

1053 **Compartment strength analysis.** We Z-score normalized the total chromosome contacts in  
1054 each 1 Mb bin of DG contact matrix, and the bins with normalized coverage between -1 and 2  
1055 were kept for the analysis. After filtering, the PC1 of genome-wide KR normalized contact matrix  
1056 was used as the compartment score. The score was divided into 50 categories with equal sizes  
1057 from low to high, and bins were assigned into the categories. The intra-chromosomal  
1058 observation/expectation (ove) matrices of each group were used to quantify the compartment  
1059 strength. We computed the average ove values within each pair of categories to generate the  
1060 50x50 saddle matrices. The compartment strength was computed with the average of upper left

1061 and lower right 10x10 matrices divided by the average of upper right and lower left 10x10  
1062 matrices<sup>86</sup>.

1063 **Domain analysis.** We identified 4,580 contact domains at 10kb resolution in DG using  
1064 *Arrowhead*<sup>82</sup>. For bin  $i$ , the insulation score is computed by

$$1065 I_i = \frac{\text{mean}_{i-10 \leq j' < i; i \leq j' < i+10} A_{i'j'}}{\max(\text{mean}_{i-10 \leq j' < i; i-10 \leq j' < i} A_{i'j'}, \text{mean}_{i \leq j' < i+10; i \leq j' < i+10} A_{i'j'})}$$

1066 , where  $A$  is the oved of KR normalized matrices. For each group, insulation scores of domain  
1067 boundaries and 100kb flanking regions were computed and averaged across all boundaries.

1068 **Figure 6 related**

1069 **Prediction model description.** To reduce the computing complexity, we applied principal  
1070 component analysis (PCA) on the dataset of 100kb-bin-mCH features to obtain the first 3,000  
1071 principal components (PCs), which retains ~ 61% variance of the original data. These 3,000  
1072 PCs were then used to train and test the predicting model. We used an artificial neural network  
1073 with two hidden layers to predict cell subtypes and their dissection regions simultaneously (Fig.  
1074 6a). The input layer contains 3,000 nodes, followed by a shared layer with 1,000 nodes. The  
1075 shared layer is further connected simultaneously to two branch hidden layers of the subtype of  
1076 the dissection region, each containing 200 nodes. Branch hidden layers are followed by the  
1077 corresponding one-hot encoding output layers. We used 5-fold cross-validation to assess the  
1078 model performance. During the training, we applied the dropout technique<sup>87</sup> with a dropout rate  
1079  $p=0.5$  on each hidden layer to prevent overfitting. Adam optimization<sup>88</sup> was used to train the  
1080 network with a cross-entropy loss function. The training epoch number and batch size are 10  
1081 and 100, respectively. The training and testing processes were conducted via TensorFlow 2.0<sup>89</sup>.

1082 **Model performance.** For each single cell input, the two output layers generate two probabilistic  
1083 vectors as the prediction results for cell subtypes and dissection regions, respectively. The  
1084 subtype and dissection region label with highest probabilities were used as the prediction results  
1085 for each cell to calculate accuracy. When calculating the cell dissection region accuracy (Fig.  
1086 6c), we defined two kinds of accuracy with different stringency: 1) the exact accuracy using the  
1087 predicted label, and 2) the fuzzy accuracy using predicted labels or its potential overlap  
1088 neighbors. The potential overlap neighbors curated based on Allen CCF (Extended Data Fig.  
1089 9a, Supplementary Table 2) stood for adjacent regions of a particular dissection region. The  
1090 exact accuracy of the ANN model is 69%, and the fuzzy accuracy is 89%. To evaluate how  
1091 much of the dissection region accuracy was improved via ANN, we calculated fuzzy accuracy

1092 just based on naive guesses in each subtype based on the dissection region composition (gray  
1093 dots in Extended Data Fig. 9b).

1094 **Biological feature importance for dissection region prediction.** To assess what DNA  
1095 regions store information of cell spatial origins that is distinguishable using our model, we  
1096 evaluated the PC feature importance by examining how permutation of each PC feature across  
1097 cells affects prediction accuracy. We did five permutations for each feature and used the  
1098 average accuracy decreasing as PC feature importance. For a given cell type, we examined  
1099 genes contained in the 100kb bins with the top 1% PCA factor loadings for the most important  
1100 PC feature.

#### 1101 **Data availability**

1102 Single cell raw and processed data included in this study were deposited to NCBI GEO/SRA  
1103 with accession number GSE132489 and to the NeMO archive: <https://portal.nemoarchive.org/>.  
1104 Cluster merged methylome profiles can be visualized at  
1105 [http://neomorph.salk.edu/mouse\\_brain.php](http://neomorph.salk.edu/mouse_brain.php).

#### 1106 **Code availability**

1107 The mapping pipeline for snmC-seq2 data: <https://cemba-data.readthedocs.io/en/latest/>; The  
1108 ALLCools package for post-mapping analysis and snmC-seq2 related data structure:  
1109 <https://github.com/lhqing/ALLCools>; The jupyter notebooks for reproducing specific analysis:  
1110 [https://github.com/lhqing/mouse\\_brain\\_2020](https://github.com/lhqing/mouse_brain_2020).

#### 1111 **Supplementary Tables**

1112 Supplementary Table 1. Glossary table for all the abbreviations.

1113 Supplementary Table 2. Metadata of the 45 brain dissection regions.

1114 Supplementary Table 3. Summary of cell numbers.

1115 Supplementary Table 4. Cell type names and annotations.

1116 Supplementary Table 5. Cell metadata and manifold learning coordinates.

1117 Supplementary Table 6. Cell type by dissection region cell counts.

1118 Supplementary Table 7. snATAC-seq clusters matching to subtypes.

## 1119 Reference

- 1120 1. Luo, C., Hajkova, P. & Ecker, J. R. Dynamic DNA methylation: In the right place at the right  
1121 time. *Science* **361**, 1336–1340 (2018).
- 1122 2. Lister, R. *et al.* Global epigenomic reconfiguration during mammalian brain development.  
1123 *Science* **341**, 1237905 (2013).
- 1124 3. Fagiolini, M., Jensen, C. L. & Champagne, F. A. Epigenetic influences on brain  
1125 development and plasticity. *Curr. Opin. Neurobiol.* **19**, 207–212 (2009).
- 1126 4. Lavery, L. A. *et al.* Losing Dnmt3a dependent methylation in inhibitory neurons impairs  
1127 neural function by a mechanism impacting Rett syndrome. *Elife* **9**, (2020).
- 1128 5. Li, J., Pinto-Duarte, A., Zander, M., Lai, C. Y. & Osteen, J. Polycomb-mediated repression  
1129 compensates for loss of postnatal DNA methylation in excitatory neurons. *bioRxiv* (2019).
- 1130 6. He, Y. *et al.* Spatiotemporal DNA Methylome Dynamics of the Developing Mammalian  
1131 Fetus. *bioRxiv* 166744 (2017) doi:10.1101/166744.
- 1132 7. Mo, A. *et al.* Epigenomic Signatures of Neuronal Diversity in the Mammalian Brain. *Neuron*  
1133 **86**, 1369–1384 (2015).
- 1134 8. Luo, C. *et al.* Single-cell methylomes identify neuronal subtypes and regulatory elements in  
1135 mammalian cortex. *Science* **357**, 600–604 (2017).
- 1136 9. Yin, Y. *et al.* Impact of cytosine methylation on DNA binding specificities of human  
1137 transcription factors. *Science* **356**, eaaj2239 (2017).
- 1138 10. Zhu, H., Wang, G. & Qian, J. Transcription factors as readers and effectors of DNA  
1139 methylation. *Nat. Rev. Genet.* **17**, 551–565 (2016).
- 1140 11. Stricker, S. H., Köferle, A. & Beck, S. From profiles to function in epigenomics. *Nat. Rev.*  
1141 *Genet.* **18**, 51–66 (2017).



- 1142 12. Gabel, H. W. *et al.* Disruption of DNA-methylation-dependent long gene repression in Rett  
1143 syndrome. *Nature* **522**, 89–93 (2015).
- 1144 13. Chen, L. *et al.* MeCP2 binds to non-CG methylated DNA as neurons mature, influencing  
1145 transcription and the timing of onset for Rett syndrome. *Proc. Natl. Acad. Sci. U. S. A.* **112**,  
1146 5509–5514 (2015).
- 1147 14. Stroud, H. *et al.* Early-Life Gene Expression in Neurons Modulates Lasting Epigenetic  
1148 States. *Cell* **171**, 1151–1164.e16 (2017).
- 1149 15. Luo, C. *et al.* Single nucleus multi-omics links human cortical cell regulatory genome  
1150 diversity to disease risk variants. *bioRxiv* 2019.12.11.873398 (2019)  
1151 doi:10.1101/2019.12.11.873398.
- 1152 16. Luo, C. *et al.* Robust single-cell DNA methylome profiling with snmC-seq2. *Nat. Commun.*  
1153 **9**, 3824 (2018).
- 1154 17. Preissl, S. *et al.* Single-nucleus analysis of accessible chromatin in developing mouse  
1155 forebrain reveals cell-type-specific transcriptional regulation. *Nat. Neurosci.* **21**, 432–439  
1156 (2018).
- 1157 18. Lee, D.-S. *et al.* Simultaneous profiling of 3D genome structure and DNA methylation in  
1158 single human cells. *Nat. Methods* **16**, 999–1006 (2019).
- 1159 19. McInnes, L., Healy, J. & Melville, J. UMAP: Uniform Manifold Approximation and Projection  
1160 for Dimension Reduction. *arXiv [stat.ML]* (2018).
- 1161 20. Zhao, C., Deng, W. & Gage, F. H. Mechanisms and functional implications of adult  
1162 neurogenesis. *Cell* **132**, 645–660 (2008).
- 1163 21. Carleton, A., Petreanu, L. T., Lansford, R., Alvarez-Buylla, A. & Lledo, P.-M. Becoming a  
1164 new neuron in the adult olfactory bulb. *Nat. Neurosci.* **6**, 507–518 (2003).
- 1165 22. Tasic, B. *et al.* Shared and distinct transcriptomic cell types across neocortical areas.

- 1166 *Nature* **563**, 72–78 (2018).
- 1167 23. Yao, Z. *et al.* An integrated transcriptomic and epigenomic atlas of mouse primary motor  
1168 cortex cell types. *bioRxiv* 2020.02.29.970558 (2020) doi:10.1101/2020.02.29.970558.
- 1169 24. Yao, Z. *et al.* A taxonomy of transcriptomic cell types across the isocortex and hippocampal  
1170 formation. *bioRxiv* 2020.03.30.015214 (2020) doi:10.1101/2020.03.30.015214.
- 1171 25. Huang, Z. J. & Paul, A. The diversity of GABAergic neurons and neural communication  
1172 elements. *Nat. Rev. Neurosci.* **20**, 563–572 (2019).
- 1173 26. Hodge, R. D. *et al.* Conserved cell types with divergent features in human versus mouse  
1174 cortex. *Nature* (2019) doi:10.1038/s41586-019-1506-7.
- 1175 27. Krienen, F. M. *et al.* Innovations in Primate Interneuron Repertoire. *bioRxiv* 709501 (2019)  
1176 doi:10.1101/709501.
- 1177 28. Dudek, S. M., Alexander, G. M. & Farris, S. Rediscovering area CA2: unique properties and  
1178 functions. *Nat. Rev. Neurosci.* **17**, 89–102 (2016).
- 1179 29. San Antonio, A., Liban, K., Ikrar, T., Tsyganovskiy, E. & Xu, X. Distinct physiological and  
1180 developmental properties of hippocampal CA2 subfield revealed by using anti-Purkinje cell  
1181 protein 4 (PCP4) immunostaining. *J. Comp. Neurol.* **522**, 1333–1354 (2014).
- 1182 30. Fukaya, M., Yamazaki, M., Sakimura, K. & Watanabe, M. Spatial diversity in gene  
1183 expression for VDCCgamma subunit family in developing and adult mouse brains.  
1184 *Neurosci. Res.* **53**, 376–383 (2005).
- 1185 31. Phillips, H. S., Hains, J. M., Laramée, G. R., Rosenthal, A. & Winslow, J. W. Widespread  
1186 expression of BDNF but not NT3 by target areas of basal forebrain cholinergic neurons.  
1187 *Science* **250**, 290–294 (1990).
- 1188 32. Adamek, G. D., Shipley, M. T. & Sanders, M. S. The indusium griseum in the mouse:  
1189 architecture, Timm’s histochemistry and some afferent connections. *Brain Res. Bull.* **12**,

- 1190 657–668 (1984).
- 1191 33. Heimer, L. & Wilson, R. D. The subcortical projections of the allocortex: similarities in the  
1192 neural connections of the hippocampus, the piriform cortex and the neocortex. Santini M,  
1193 editor. *Perspectives in neurobiology* (1975).
- 1194 34. Voorn, P., Vanderschuren, L. J. M. J., Groenewegen, H. J., Robbins, T. W. & Pennartz, C.  
1195 M. A. Putting a spin on the dorsal-ventral divide of the striatum. *Trends Neurosci.* **27**,  
1196 468–474 (2004).
- 1197 35. Smith, J. B. *et al.* Genetic-Based Dissection Unveils the Inputs and Outputs of Striatal  
1198 Patch and Matrix Compartments. *Neuron* **91**, 1069–1084 (2016).
- 1199 36. Zhang, Z. *et al.* Epigenomic Diversity of Cortical Projection Neurons in the Mouse Brain.  
1200 *bioRxiv* 2020.04.01.019612 (2020) doi:10.1101/2020.04.01.019612.
- 1201 37. Mukamel, E. A. & Ngai, J. Perspectives on defining cell types in the brain. *Curr. Opin.*  
1202 *Neurobiol.* **56**, 61–68 (2019).
- 1203 38. Haghverdi, L., Lun, A. T. L., Morgan, M. D. & Marioni, J. C. Batch effects in single-cell  
1204 RNA-sequencing data are corrected by matching mutual nearest neighbors. *Nat.*  
1205 *Biotechnol.* **36**, 421–427 (2018).
- 1206 39. Hie, B., Bryson, B. & Berger, B. Efficient integration of heterogeneous single-cell  
1207 transcriptomes using Scanorama. *Nat. Biotechnol.* (2019) doi:10.1038/s41587-019-0113-3.
- 1208 40. Deneris, E. S. & Hobert, O. Maintenance of postmitotic neuronal cell identity. *Nat. Neurosci.*  
1209 **17**, 899–907 (2014).
- 1210 41. Kepecs, A. & Fishell, G. Interneuron cell types are fit to function. *Nature* **505**, 318–326  
1211 (2014).
- 1212 42. Paul, A. *et al.* Transcriptional Architecture of Synaptic Communication Delineates  
1213 GABAergic Neuron Identity. *Cell* **171**, 522–539.e20 (2017).

- 1214 43. Fornes, O. *et al.* JASPAR 2020: update of the open-access database of transcription factor  
1215 binding profiles. *Nucleic Acids Res.* (2019) doi:10.1093/nar/gkz1001.
- 1216 44. Cubelos, B. *et al.* Cux1 and Cux2 regulate dendritic branching, spine morphology, and  
1217 synapses of the upper layer neurons of the cortex. *Neuron* **66**, 523–535 (2010).
- 1218 45. Oishi, K., Aramaki, M. & Nakajima, K. Mutually repressive interaction between Brn1/2 and  
1219 Rorb contributes to the establishment of neocortical layer 2/3 and layer 4. *Proc. Natl. Acad.*  
1220 *Sci. U. S. A.* **113**, 3371–3376 (2016).
- 1221 46. Arendt, D. *et al.* The origin and evolution of cell types. *Nat. Rev. Genet.* **17**, 744–757  
1222 (2016).
- 1223 47. Smith, J. B. *et al.* The relationship between the claustrum and endopiriform nucleus: A  
1224 perspective towards consensus on cross-species homology. *J. Comp. Neurol.* **527**,  
1225 476–499 (2019).
- 1226 48. Crick Francis C & Koch Christof. What is the function of the claustrum? *Philos. Trans. R.*  
1227 *Soc. Lond. B Biol. Sci.* **360**, 1271–1279 (2005).
- 1228 49. Puelles, L. Chapter 4 - Development and Evolution of the Claustrum. in *The Claustrum*  
1229 (eds. Smythies, J. R., Edelman, L. R. & Ramachandran, V. S.) 119–176 (Academic Press,  
1230 2014).
- 1231 50. Ross, S. E., Greenberg, M. E. & Stiles, C. D. Basic helix-loop-helix factors in cortical  
1232 development. *Neuron* **39**, 13–25 (2003).
- 1233 51. He, Y. *et al.* Improved regulatory element prediction based on tissue-specific local  
1234 epigenomic signatures. *Proc. Natl. Acad. Sci. U. S. A.* **114**, E1633–E1640 (2017).
- 1235 52. Arlotta, P. *et al.* Neuronal subtype-specific genes that control corticospinal motor neuron  
1236 development in vivo. *Neuron* **45**, 207–221 (2005).
- 1237 53. Allen, T. & Lobe, C. G. A comparison of Notch, Hes and Grg expression during murine

- 1238 embryonic and post-natal development. *Cell. Mol. Biol.* **45**, 687–708 (1999).
- 1239 54. Hrvatin, S. *et al.* PESCA: A scalable platform for the development of cell-type-specific viral  
1240 drivers. *bioRxiv* 570895 (2019) doi:10.1101/570895.
- 1241 55. Mich, J. K. *et al.* Epigenetic landscape and AAV targeting of human neocortical cell classes.  
1242 *bioRxiv* 555318 (2019) doi:10.1101/555318.
- 1243 56. Dimidschstein, J. *et al.* A viral strategy for targeting and manipulating interneurons across  
1244 vertebrate species. *Nat. Neurosci.* **19**, 1743–1749 (2016).
- 1245 57. Dekker, J. & Mirny, L. The 3D Genome as Moderator of Chromosomal Communication. *Cell*  
1246 **164**, 1110–1121 (2016).
- 1247 58. Ferland, R. J., Cherry, T. J., Preware, P. O., Morrissey, E. E. & Walsh, C. A. Characterization  
1248 of Foxp2 and Foxp1 mRNA and protein in the developing and mature brain. *J. Comp.*  
1249 *Neurol.* **460**, 266–279 (2003).
- 1250 59. Siddiqui, T. J. *et al.* An LRRTM4-HSPG complex mediates excitatory synapse development  
1251 on dentate gyrus granule cells. *Neuron* **79**, 680–695 (2013).
- 1252 60. Yamawaki, N., Borges, K., Suter, B. A., Harris, K. D. & Shepherd, G. M. G. A genuine layer  
1253 4 in motor cortex with prototypical synaptic circuit connectivity. *Elife* **3**, e05422 (2014).
- 1254 61. Nieto, M. *et al.* Expression of Cux-1 and Cux-2 in the subventricular zone and upper layers  
1255 II–IV of the cerebral cortex. *J. Comp. Neurol.* **479**, 168–180 (2004).
- 1256 62. Fanselow, M. S. & Dong, H.-W. Are the dorsal and ventral hippocampus functionally distinct  
1257 structures? *Neuron* **65**, 7–19 (2010).
- 1258 63. Cembrowski, M. S., Wang, L., Sugino, K., Shields, B. C. & Spruston, N. Hipposeq: a  
1259 comprehensive RNA-seq database of gene expression in hippocampal principal neurons.  
1260 *Elife* **5**, e14997 (2016).
- 1261 64. Zhang, T.-Y. *et al.* Environmental enrichment increases transcriptional and epigenetic

- 1262 differentiation between mouse dorsal and ventral dentate gyrus. *Nat. Commun.* **9**, 298  
1263 (2018).
- 1264 65. Hon, G. C. *et al.* Epigenetic memory at embryonic enhancers identified in DNA methylation  
1265 maps from adult mouse tissues. *Nat. Genet.* **45**, 1198–1206 (2013).
- 1266 66. Sansom, S. N. & Livesey, F. J. Gradients in the brain: the control of the development of  
1267 form and function in the cerebral cortex. *Cold Spring Harb. Perspect. Biol.* **1**, a002519  
1268 (2009).
- 1269 67. O’Leary, D. D. M., Chou, S.-J. & Sahara, S. Area patterning of the mammalian cortex.  
1270 *Neuron* **56**, 252–269 (2007).
- 1271 68. Gorkin, D. U. *et al.* Systematic mapping of chromatin state landscapes during mouse  
1272 development. *bioRxiv* 166652 (2017) doi:10.1101/166652.
- 1273 69. Allen Institute for Brain Science. Allen Mouse Brain Reference Atlas CCF v3. *Allen Mouse*  
1274 *Brain Reference Atlas CCF v3* <http://atlas.brain-map.org> (2017).
- 1275 70. Schultz, M. D. *et al.* Human body epigenome maps reveal noncanonical DNA methylation  
1276 variation. *Nature* **523**, 212–216 (2015).
- 1277 71. Amemiya, H. M., Kundaje, A. & Boyle, A. P. The ENCODE Blacklist: Identification of  
1278 Problematic Regions of the Genome. *Sci. Rep.* **9**, 9354 (2019).
- 1279 72. Wolf, F. A., Angerer, P. & Theis, F. J. SCANPY: large-scale single-cell gene expression data  
1280 analysis. *Genome Biol.* **19**, 15 (2018).
- 1281 73. Traag, V. A., Waltman, L. & van Eck, N. J. From Louvain to Leiden: guaranteeing  
1282 well-connected communities. *Sci. Rep.* **9**, 5233 (2019).
- 1283 74. Guyon, I., Weston, J., Barnhill, S. & Vapnik, V. Gene Selection for Cancer Classification  
1284 using Support Vector Machines. *Mach. Learn.* **46**, 389–422 (2002).
- 1285 75. Brodersen, K. H., Ong, C. S., Stephan, K. E. & Buhmann, J. M. The Balanced Accuracy

- 1286 and Its Posterior Distribution. in *2010 20th International Conference on Pattern Recognition*  
1287 3121–3124 (2010).
- 1288 76. Lemaître, G., Nogueira, F. & Aridas, C. K. Imbalanced-learn: A Python Toolbox to Tackle  
1289 the Curse of Imbalanced Datasets in Machine Learning. *J. Mach. Learn. Res.* **18**, 1–5  
1290 (2017).
- 1291 77. Maaten, L. van der & Hinton, G. Visualizing Data using t-SNE. *J. Mach. Learn. Res.* **9**,  
1292 2579–2605 (2008).
- 1293 78. Linderman, G. C., Rachh, M., Hoskins, J. G., Steinerberger, S. & Kluger, Y. Fast  
1294 interpolation-based t-SNE for improved visualization of single-cell RNA-seq data. *Nat.*  
1295 *Methods* **16**, 243–245 (2019).
- 1296 79. Suzuki, R. & Shimodaira, H. Pvclust: an R package for assessing the uncertainty in  
1297 hierarchical clustering. *Bioinformatics* **22**, 1540–1542 (2006).
- 1298 80. Grant, C. E., Bailey, T. L. & Noble, W. S. FIMO: scanning for occurrences of a given motif.  
1299 *Bioinformatics* **27**, 1017–1018 (2011).
- 1300 81. Wingender, E., Schoeps, T., Haubrock, M., Krull, M. & Dönitz, J. TFClass: expanding the  
1301 classification of human transcription factors to their mammalian orthologs. *Nucleic Acids*  
1302 *Res.* **46**, D343–D347 (2018).
- 1303 82. Rao, S. S. P. *et al.* A 3D map of the human genome at kilobase resolution reveals principles  
1304 of chromatin looping. *Cell* **159**, 1665–1680 (2014).
- 1305 83. Urich, M. A., Nery, J. R., Lister, R., Schmitz, R. J. & Ecker, J. R. MethylC-seq library  
1306 preparation for base-resolution whole-genome bisulfite sequencing. *Nat. Protoc.* **10**,  
1307 475–483 (2015).
- 1308 84. Zhou, J. *et al.* Robust single-cell Hi-C clustering by convolution- and random-walk-based  
1309 imputation. *Proceedings of the National Academy of Sciences* vol. 116 14011–14018

- 1310 (2019).
- 1311 85. Klopfenstein, D. V. *et al.* GOATOOLS: A Python library for Gene Ontology analyses. *Sci.*  
1312 *Rep.* **8**, 10872 (2018).
- 1313 86. Zhang, H. *et al.* Chromatin structure dynamics during the mitosis-to-G1 phase transition.  
1314 *Nature* **576**, 158–162 (2019).
- 1315 87. Srivastava, N., Hinton, G., Krizhevsky, A., Sutskever, I. & Salakhutdinov, R. Dropout: a  
1316 simple way to prevent neural networks from overfitting. (2014).
- 1317 88. Kingma, D. P. & Ba, J. Adam: A Method for Stochastic Optimization. *arXiv [cs.LG]* (2014).
- 1318 89. Abadi, M. *et al.* Tensorflow: A system for large-scale machine learning. in *12th {USENIX}*  
1319 *Symposium on Operating Systems Design and Implementation ({OSDI} 16)* 265–283  
1320 (2016).



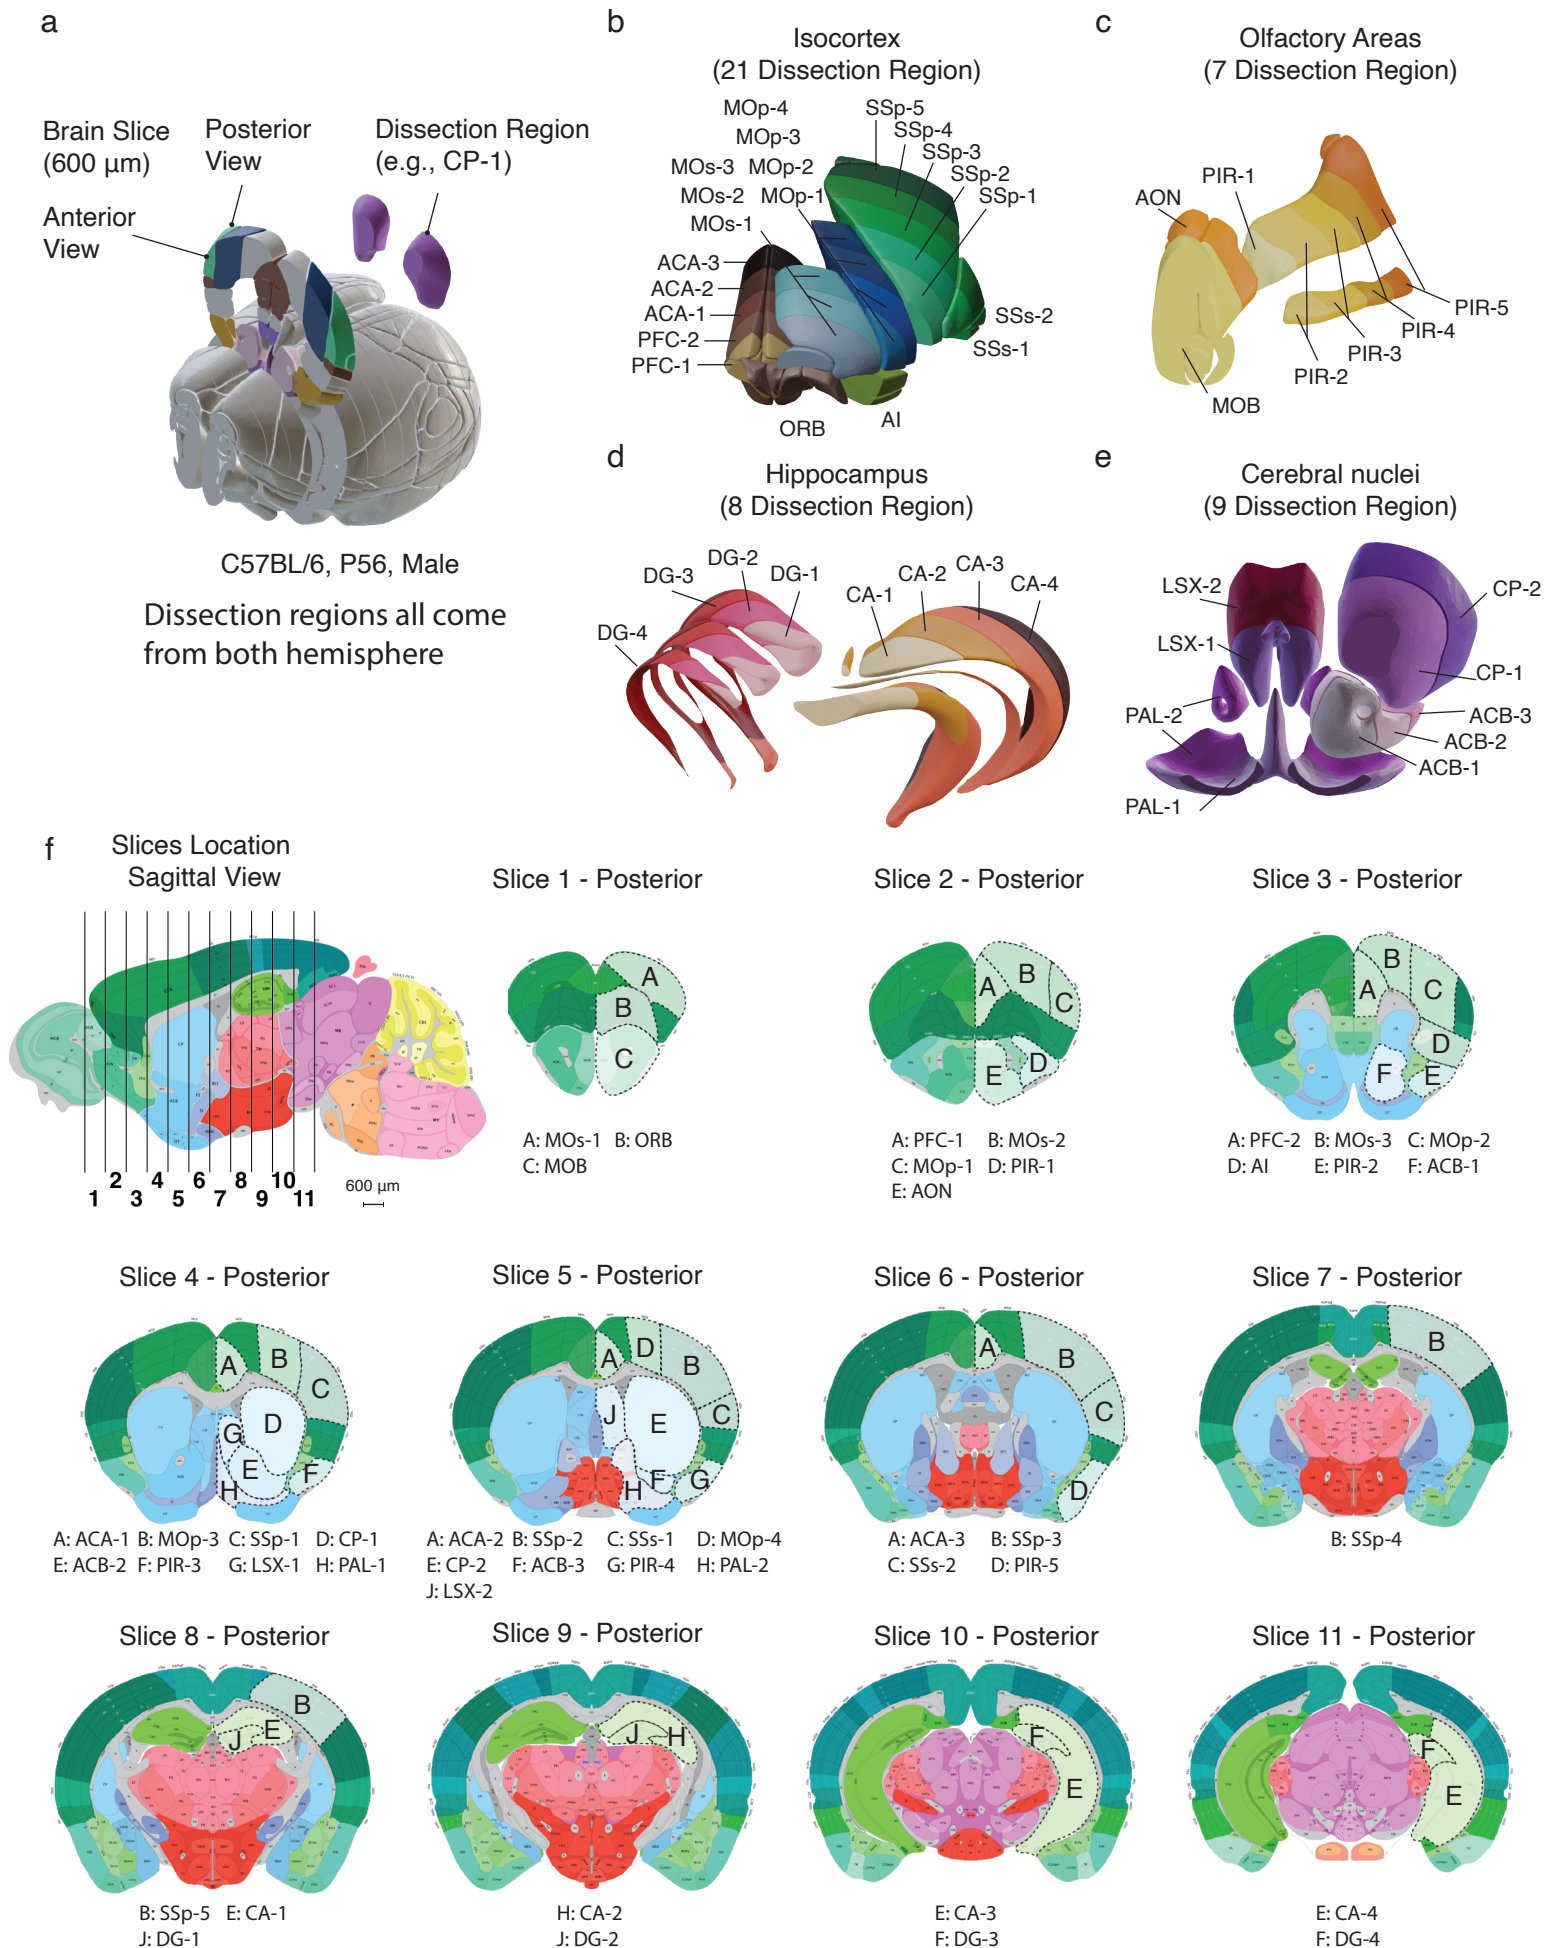

Figure S1

1321 **Extended Data Fig. 1. Brain dissection regions**

1322 **a**, 3D schematic of brain dissection steps. Each P56, male, C57BL/6 mouse brain is dissected  
1323 into 600-micron slices. we then dissect brain regions from both hemispheres within a specific  
1324 slice. **b-e**, 3D adult P56 mouse brain schematic adapted from Allen CCFv3 to display the four  
1325 major brain regions and 45 dissection regions. Each color and the corresponding label  
1326 represents a dissection region. **f**, 2D adult P56 mouse brain atlas adapted from Allen Mouse  
1327 Brain Reference Atlas, the first sagittal image showing the location of each coronal slice,  
1328 followed by 11 posterior view images of all coronal slices, the same 45 dissection regions are  
1329 labeled on the corresponding slice. All coronal images follow the same scale as the sagittal  
1330 image. The posterior view of each slice is the anterior view of the next slice.

a

Major Types on L1-UMAP

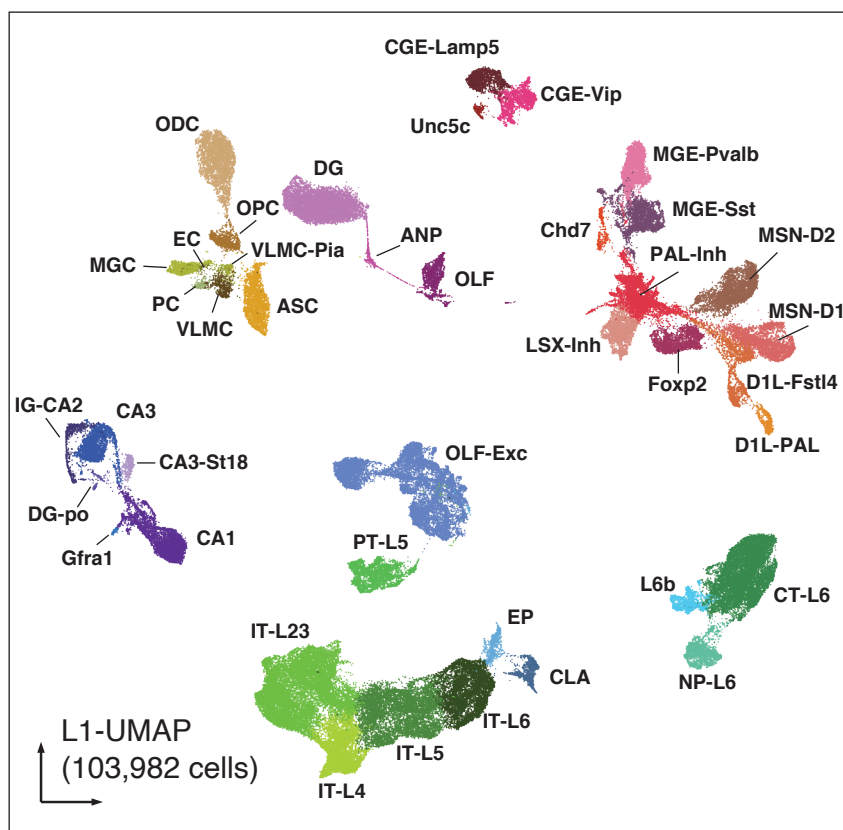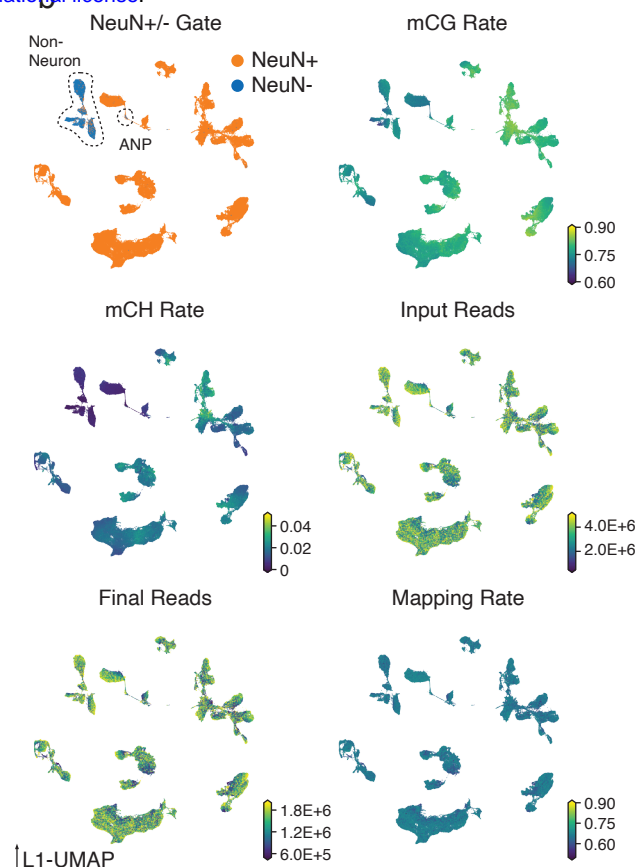

c

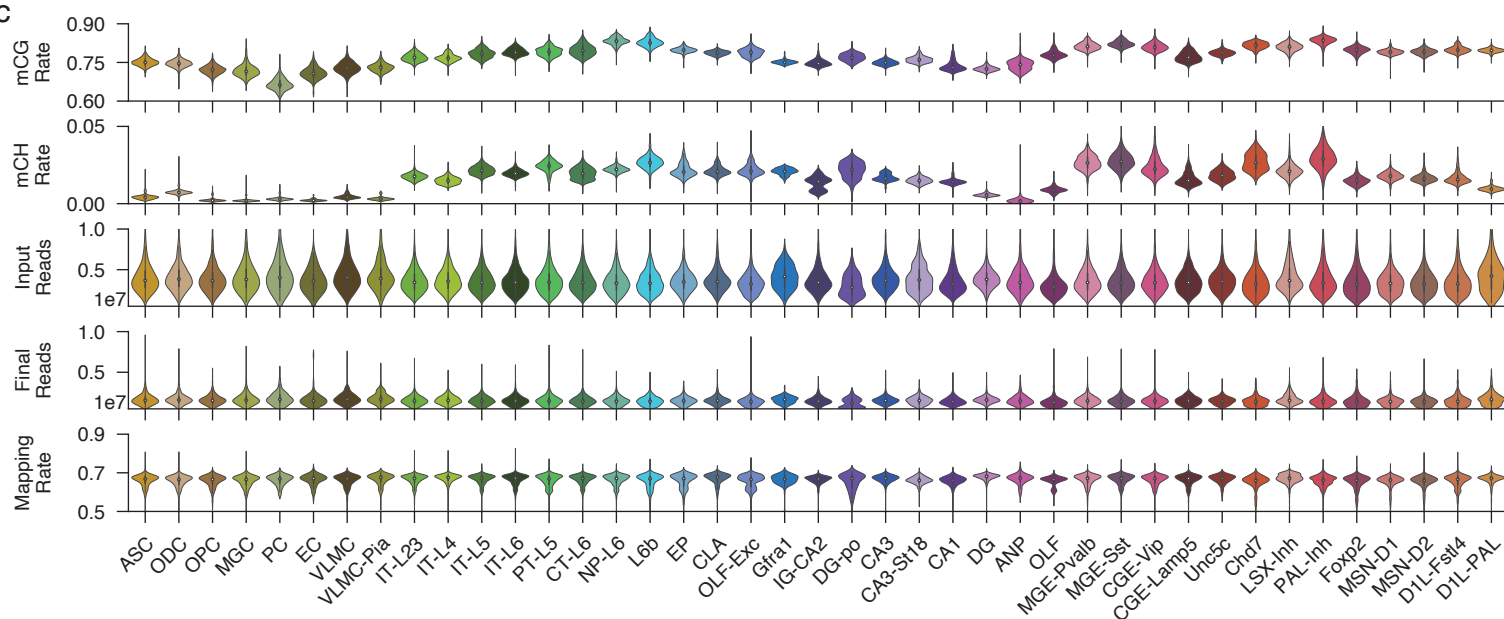

d

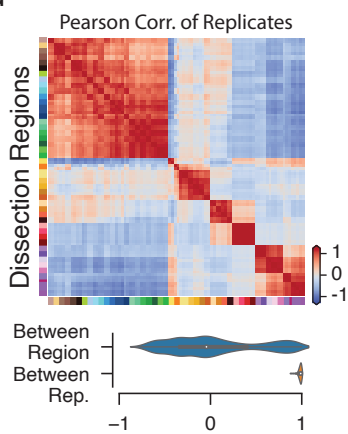

e

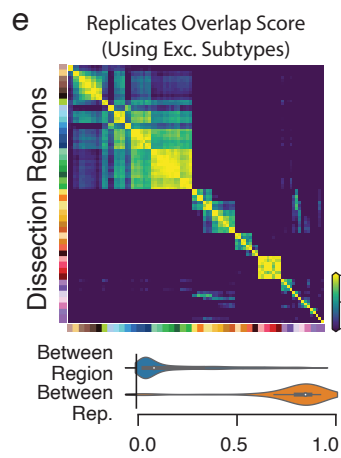

f

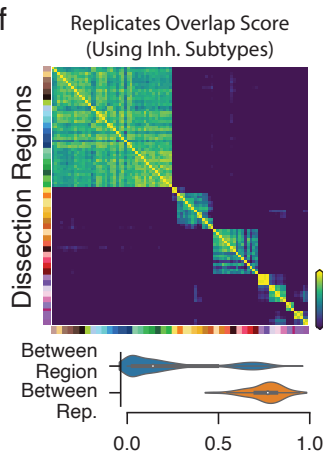

g

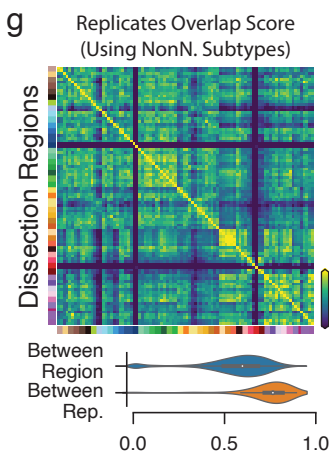

Figure S2

1331 **Extended Data Fig. 2. Major Type labeling and basic mapping metrics of snmC-seq2.**

1332 **a**, L1-UMAP colored and labeled by major cell types. **b**, L1-UMAP colored by NeuN antibody  
1333 FACS gates and other snmC-seq2 key read mapping metrics. **c**, Violin plots for all of the key  
1334 metrics, group by major types. **d**, Heatmap of Pearson correlation between the average  
1335 methylome profiles (mean mCH and mCG rate of all chromosome 100kb bins across all cells  
1336 belong to a replicate sample) of the 92 replicates from 45 brain regions. The violin plot below  
1337 summarizes the value between replicates within the same brain region, or between different  
1338 brain regions. **e-g**, Pairwise overlap score (measuring co-clustering of two replicates) of  
1339 excitatory subtypes (**e**), inhibitory subtypes (**f**), and non-neuronal subtypes (**g**). The violin plots  
1340 summarize the subtype overlap score between replicates within the same brain region, or  
1341 between different brain regions.



1342 **Extended Data Fig. 3. Cell-type composition of dissection regions**

1343 **a-d**, L1-UMAP labeled by major types and partially colored by dissection regions for cells from  
1344 Isocortex (**a**), olfactory areas (**b**), hippocampus (**c**), and cerebral nucleus (**d**). Other cells are  
1345 shown in gray as background. **e**, Similar compound bar plot as Fig. 1h, from top to bottom,  
1346 showing the organization of dissection regions and the major type composition of each  
1347 dissection region.

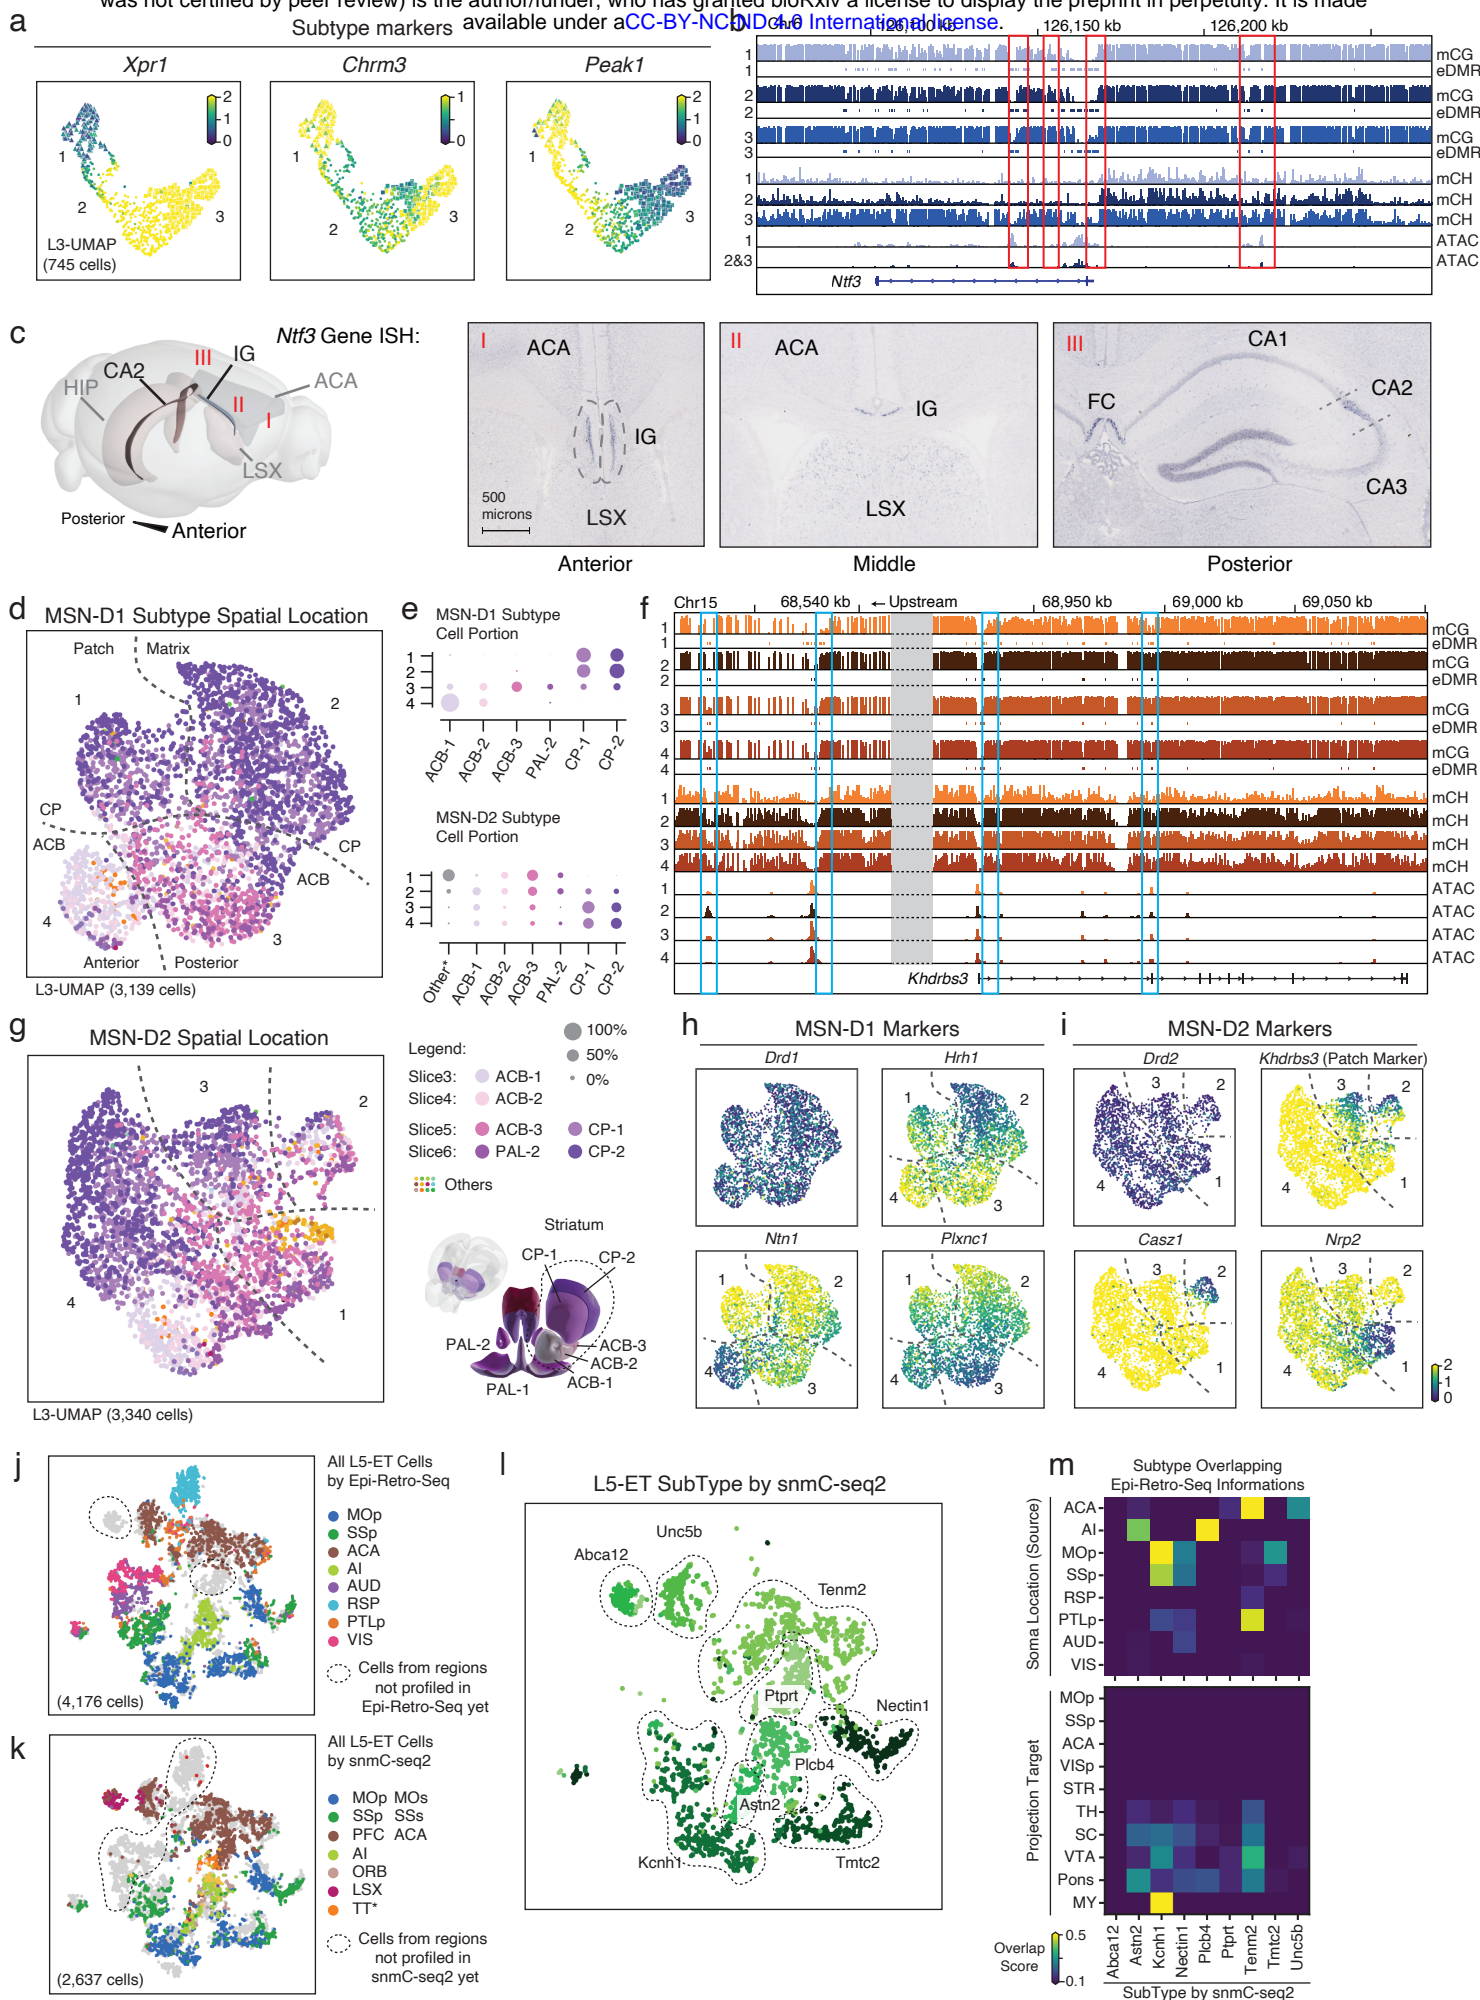

Figure S4

1348 **Extended Data Fig. 4. Supporting details of cellular and spatial diversity of neurons at the**  
1349 **subtype level.**

1350 **a**, mCH Rate of marker genes in IG-CA2 cells. **b**, Methylome and chromatin accessibility  
1351 genome browser view of *Ntf3* genes and its upstream regions. ATAC and eDMR information are  
1352 from Fig.4 analysis. **c**, Three different views of the ISH experiment from ABA, showing the *Ntf3*  
1353 gene expressed in both IG and CA2. **d**, L3-UMAP from MSN-D1 cells colored by subregion. The  
1354 numbers are subtypes marked by hypomethylation of unique genes: 1) *Khdrbs3*, 2) *Hrh1*, 3)  
1355 *Plxnc1*, an 4) *Ntn1*. **e**, The dot plot shows region composition of each subtype of MSN-D1 and  
1356 MSN-D2. **f**, Genome browser view of *Khdrbs3* genes similar to (**b**). **g**, MSN-D2 subtypes  
1357 marked by hypomethylation of unique genes: 1) *Nrp2*, 2) *Casz1*, 3) *Col14a1*, and 4) *Slc24a2*. **h**,  
1358 **i**, mCH Rate of MSN-D1 (**h**) and MSN-D2 (**i**) subtype marker genes. **j**, **k**, Same integration  
1359 t-SNE as Fig. 2i-j colored by the dissection regions, but using all cells that have been profiled by  
1360 Epi-Retro-Seq (**j**) or snmC-seq2 (**k**), cells from brain regions that have only been profiled via  
1361 one of the methods are circled out. **l**, Same t-SNE as (**k**) colored subtypes. **m**, Overlap score  
1362 matrix matching the subtypes to the “Soma Location (source)” and “Projection Target”  
1363 information labels of Epi-Retro-Seq cells.



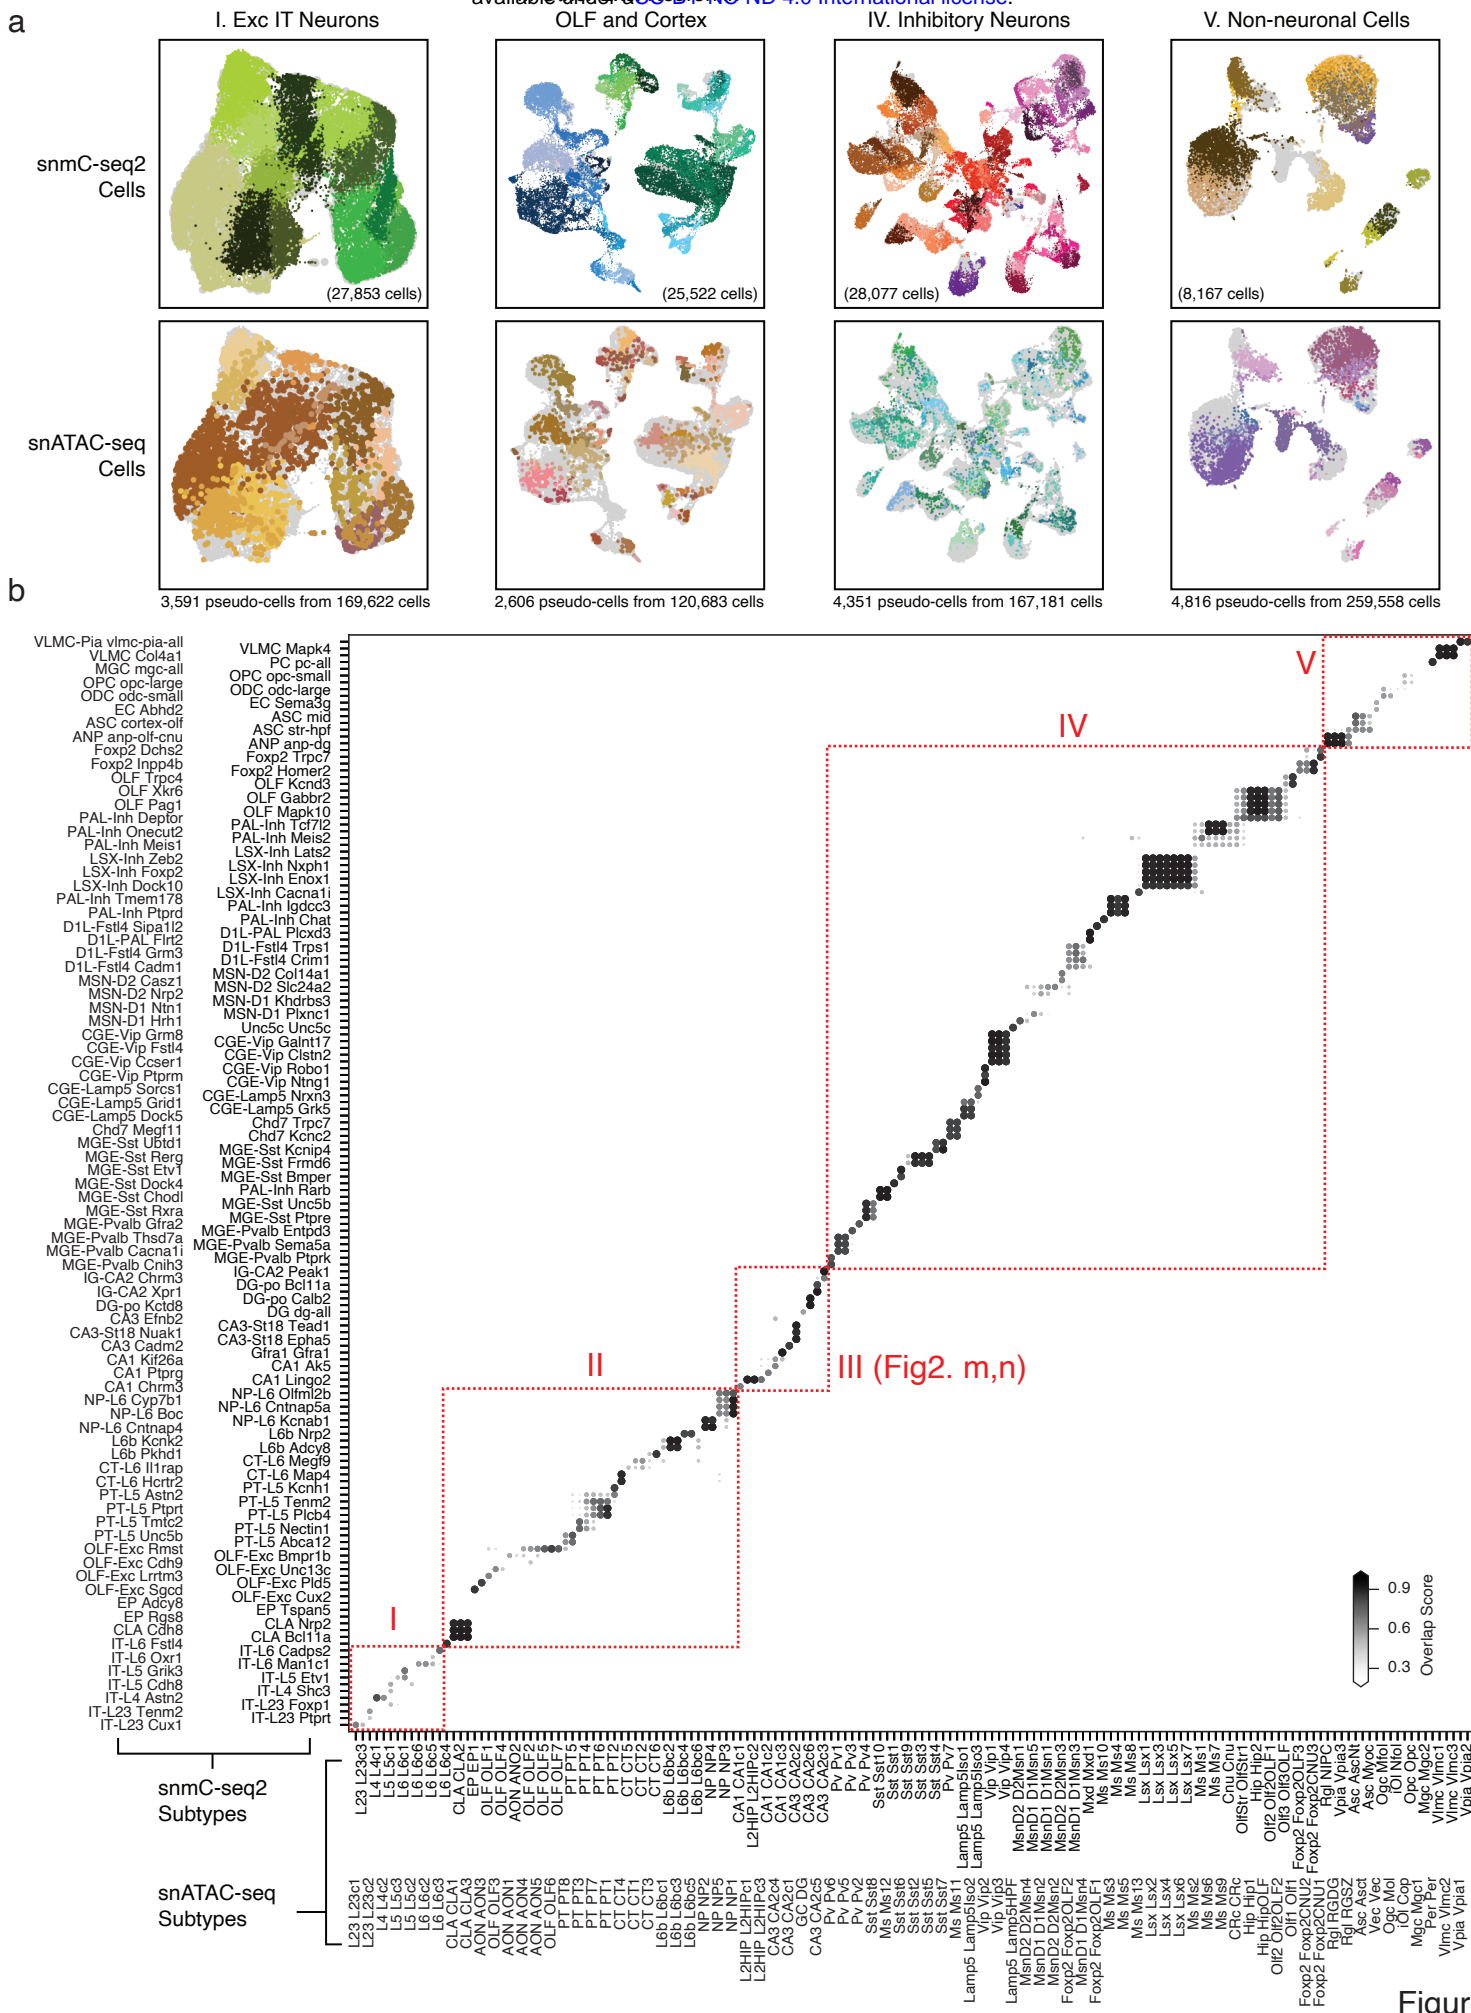

Figure S5

1364 **Extended Data Fig. 5. Integration with snATAC-seq**

1365 **a**, Integration UMAP for snmC-seq2 cells (top row) and snATAC-seq pseudo-cells (bottom row).  
1366 Each panel is colored by subtypes from the corresponding study, the other dataset shown in  
1367 gray in the background. snATAC-seq subtype color token from Li et al., (Companion Manuscript  
1368 # 11). Integration is done in five separate groups, including four shown here and one shown in  
1369 Fig. 2m-n. **b**, Overlap score matrix matching the 160 snATAC-seq subtypes to the 161  
1370 snmC-seq2 subtypes.



1371 **Extended Data Fig. 6. Subtype phylogeny with related gene and motifs**

1372 **a, b**, Subtype phylogeny of excitatory (**a**) and inhibitory (**b**) neurons. Leaf nodes colored by  
1373 subtypes, and the barplot shows subregion composition. **c, d**, Counts heatmap of pairwise  
1374 CH-DMG (**c**) and CG-DMR (**d**) between 77 inhibitory subtypes. **e-g**, Top TFs (**e**), other genes  
1375 (**f**), and enriched motifs (**g**) rank by total impact score based on the inhibitory subtype  
1376 phylogeny. **h**, An example gene *Tshz1* only shows subtype diversity in inhibitory subtypes but  
1377 not excitatory subtypes. **i**, Comparison of the total impact scores calculated from either  
1378 excitatory subtype phylogeny (x-axis) or inhibitory subtype phylogeny (y-axis) for TFs, other  
1379 genes, and enriched motifs.

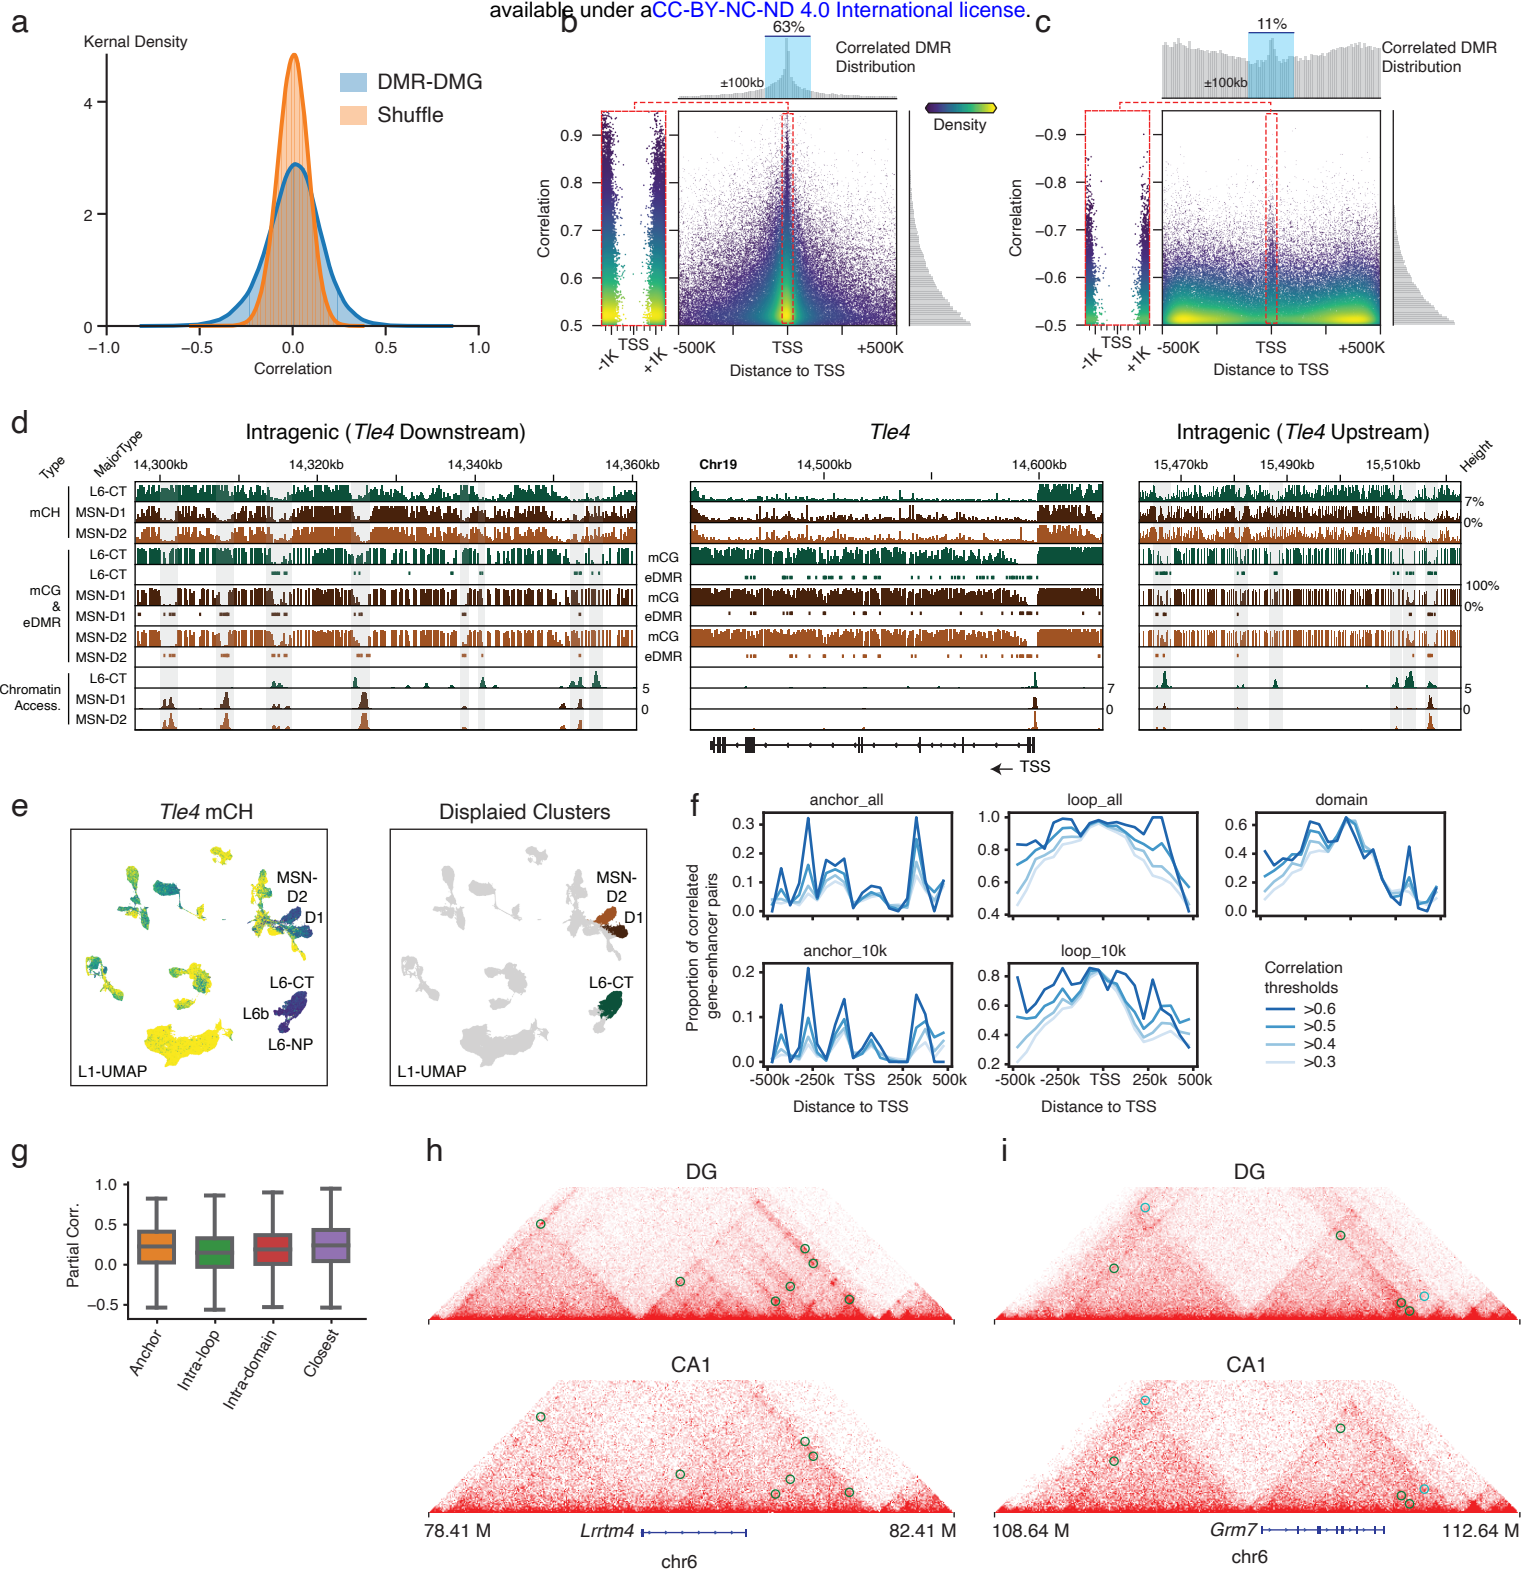

1380 **Extended Data Fig. 7. Gene-Enhancer landscape related**

1381 **a**, Distribution of actual DMR-DMG partial correlation compared to the shuffled null distribution.  
1382 **b, c**, DMR-DMG correlation (y-axis) and the distance between DMR center and gene TSS  
1383 (x-axis), each point is a DMR-DMG pair, color represents points kernel density. The positively  
1384 **(b)** and negatively **(c)** correlated DMRs are shown separately, due to very different genome  
1385 location distributions that are plotted on the top histograms. **d**, detailed view of surrounding  
1386 eDMRs that are correlated with *Tle4* gene body mCH. Alternative eDMRs only appear in either  
1387 L6-CT or MSN-D1/D2 can be seen on both upstream and downstream of the gene. **e**, *Tle4* gene  
1388 body mCH and the major type label on L1-UMAP, paired with **(d)**. **f**, Proportion of loop  
1389 supported enhancer-gene pairs among those linked by correlation analyses surpassing different  
1390 correlation thresholds at each specific distance. **g**, Partial correlation between mCG of  
1391 enhancers and mCH of genes linked by different methods (n=4,171, 127,730, 28,203, 10,058).  
1392 The elements of boxplots are defined as: center line, median; box limits, first and third quartiles;  
1393 whiskers, 1.5× interquartile range. **h, i**, Interaction maps, mCH, mCG, ATAC, and differential  
1394 loops tracks surrounding *Lrrtm4* **(h)** and *Grm7* **(i)**. Circles on the interaction maps represent  
1395 differential loops between DG and CA1, where green represents DG loops, and cyan represents  
1396 CA1 loops.

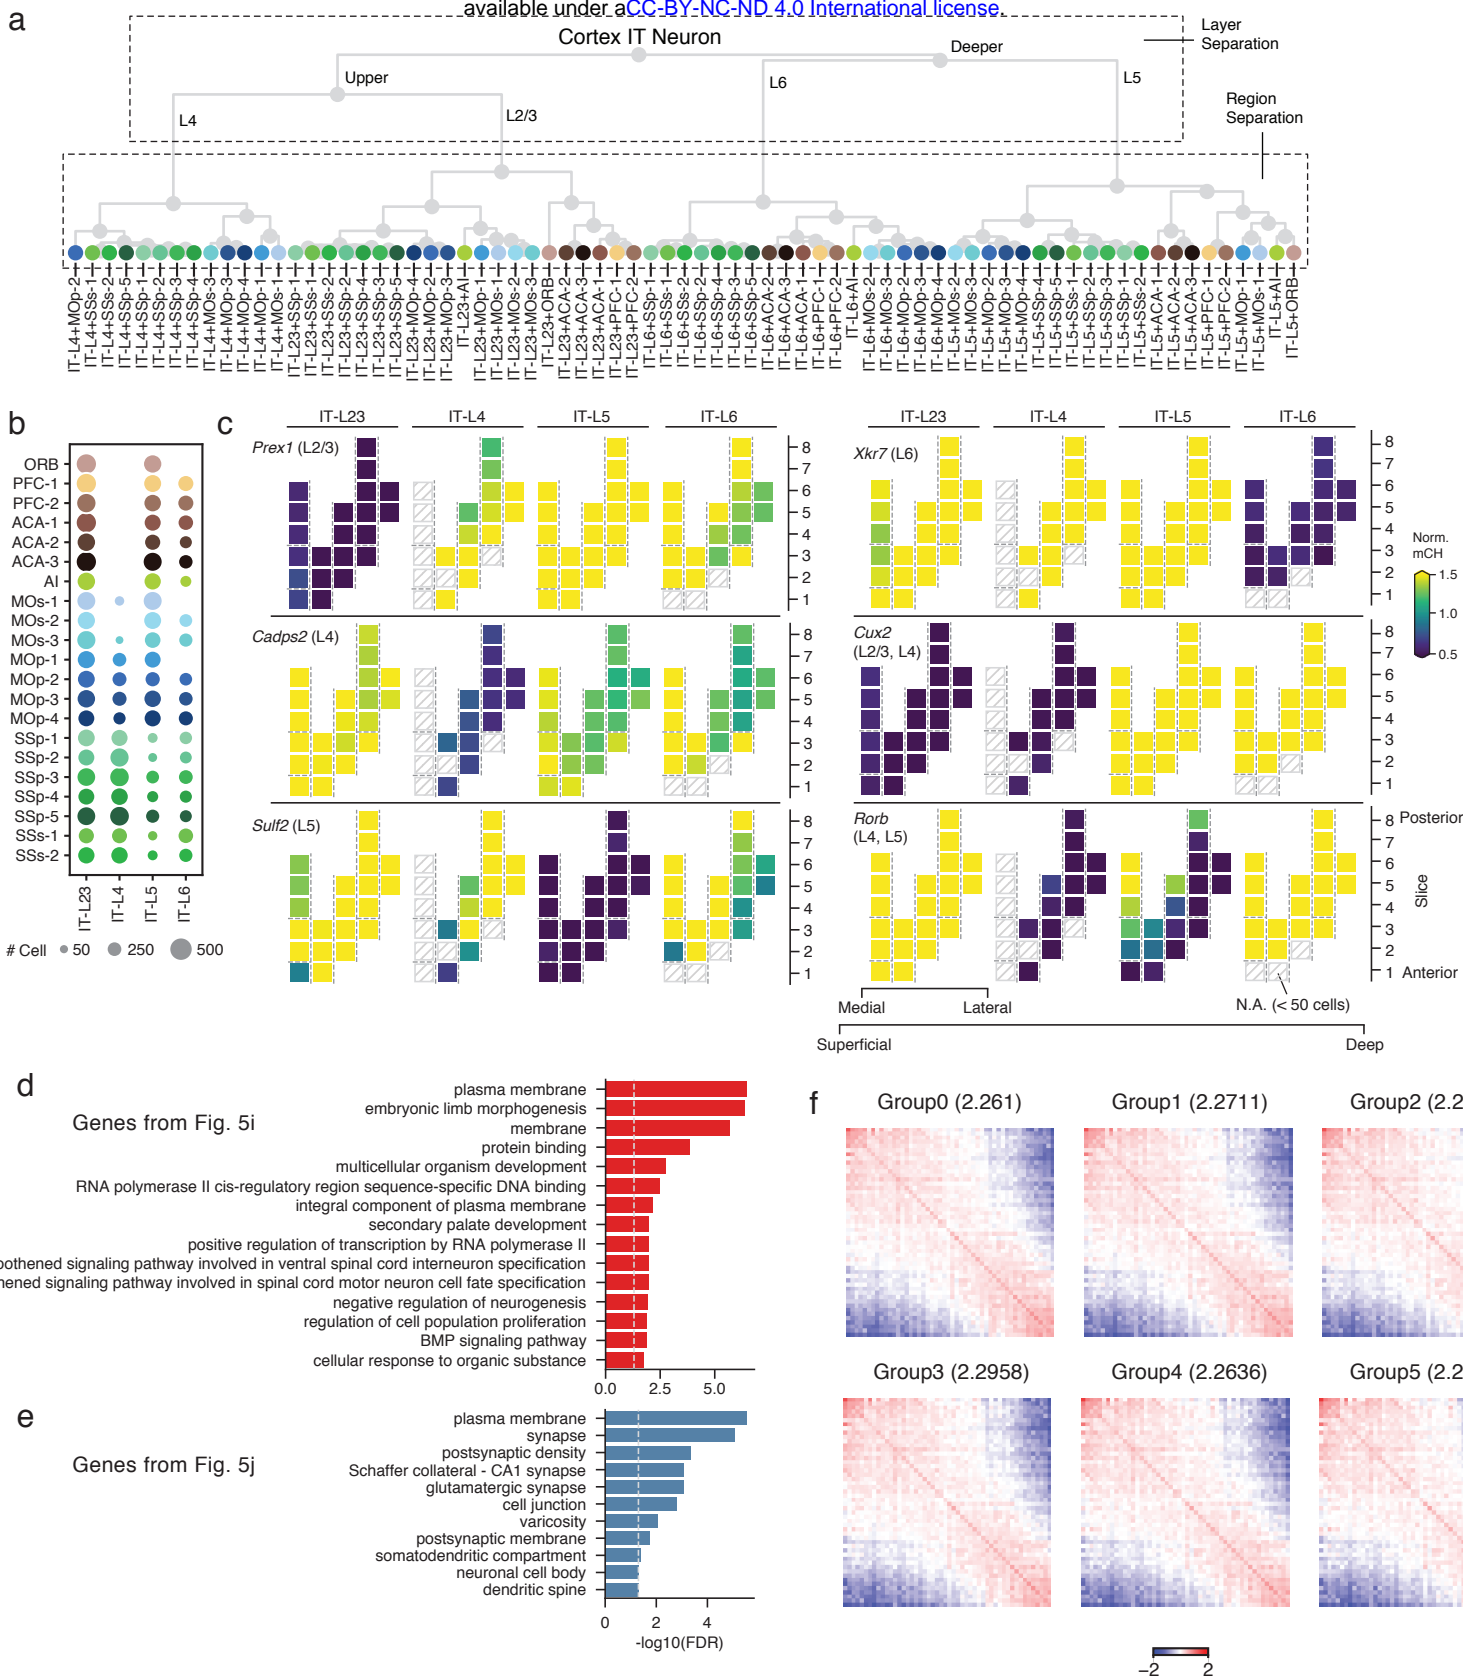

1397 **Extended Data Fig. 8. DNA methylation gradient related**

1398 **a**, Layer-dissection-region cell group phylogeny. **b**, Dot plot sized by the number of cells in each  
1399 layer-dissection-region combination in excitatory IT neurons. Each group needs at least 50 cells  
1400 to be included in the analysis. **c**, Representative marker genes for laminar layers separation.  
1401 Using the same dissection region layout as Fig. 5b. **d**, **e**, Top enriched GO terms for positively  
1402 (**d**) and negatively (**e**) correlated DMR enriched genes. **f**, Saddle plots of different groups of DG  
1403 cells separated by global mCH. Values in the title represent the compartment strengths.



**a**

bioRxiv preprint doi: <https://doi.org/10.1101/2020.04.30.069377>; this version posted April 30, 2020. The copyright holder for this preprint (which was not certified by peer review) is the author/funder, who has granted bioRxiv a license to display the preprint in perpetuity. It is made available under aCC-BY-NC-ND 4.0 International license.

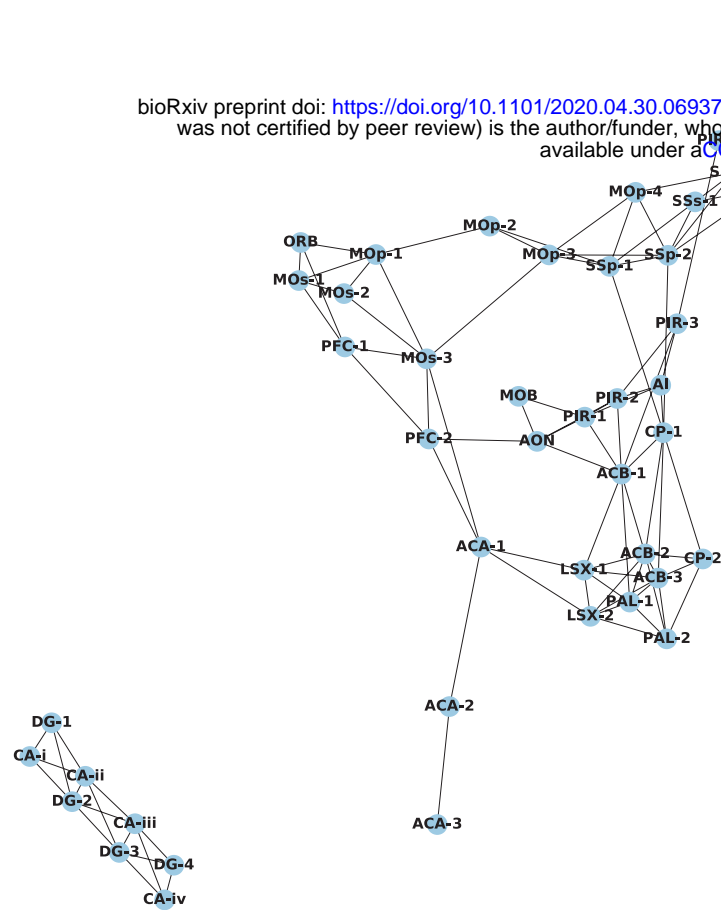**b**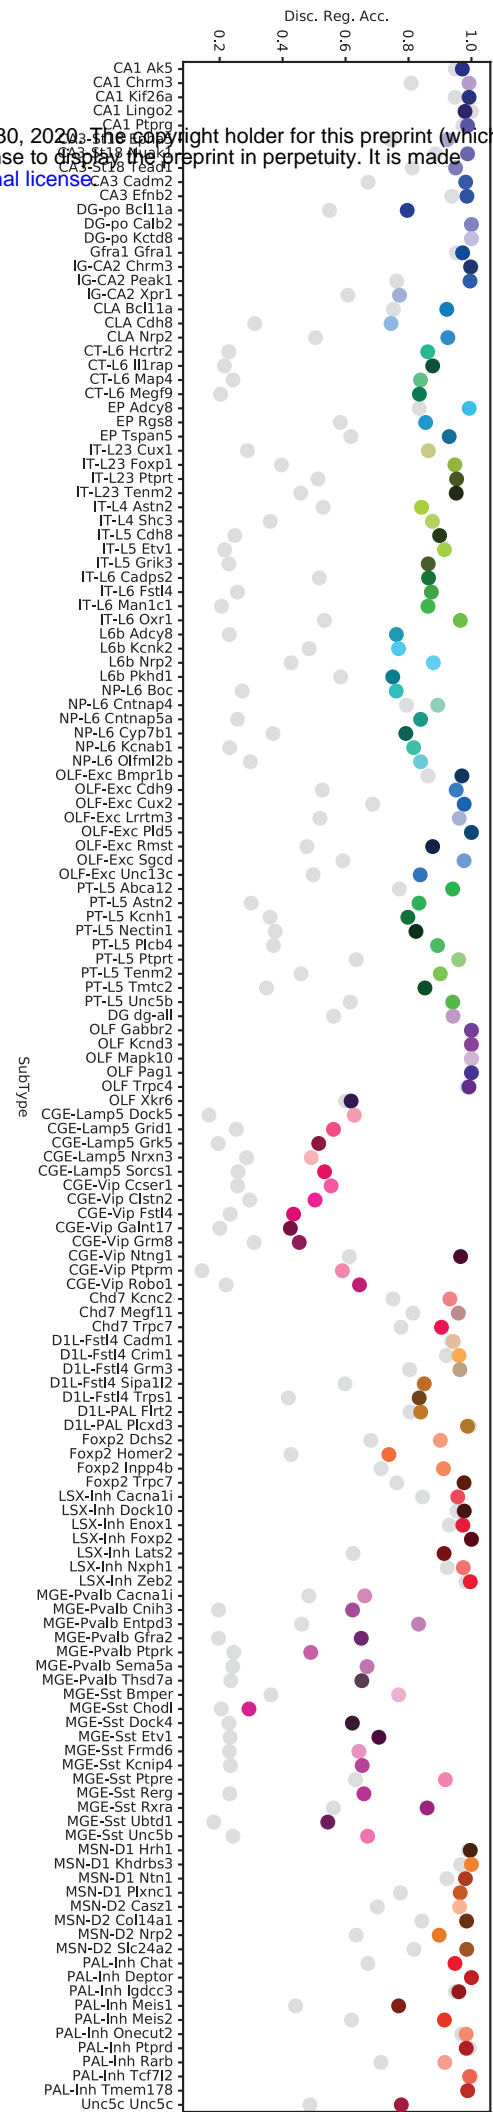

Figure S9

1404 **Extended Data Fig. 9. Evaluation of the predictive model**

1405 **a**, The neighbor relation among the potential overlapping dissection regions. The network is  
1406 constructed based on information of the dissection scheme and the “Potential Overlap” column  
1407 in Supplementary Table 2. **b**, Prediction accuracy of dissection region at cell subtype level. The  
1408 colored points denote the prediction accuracy of the model, while the grey ones denote the  
1409 random guess accuracy when cell subtypes and corresponding spatial distributions are given.
